# Supplementary material
Source: PubMed Central journal article supplement (PMC6344890)
Supplement: NIHMS1001558-supplement-Supplemental.pdf [file NIHMS1001558-supplement-Supplemental.pdf]

# Supplemental Characterization Data

## Furoxans (oxadiazole-4N-oxides) with Attenuated Reactivity are Neuroprotective, Cross the Blood Brain Barrier, and Improve Passive Avoidance Memory

*Austin Horton<sup>†</sup>, Kevin Nash<sup>‡</sup>, Ethel Tackie-Yarboi<sup>†</sup>, Alexander Kostrevski<sup>†</sup>, Adam Novak<sup>†</sup>,  
Aparna Raghavan<sup>†</sup>, Jatin Tulsulkar<sup>†</sup>, Qasim Alhadidi<sup>†</sup>, Nathan Wamer<sup>†</sup>, Bryn Langenderfer<sup>†</sup>,  
Kalee Royster<sup>†</sup>, Maxwell Ducharme<sup>†</sup>, Katelyn Hagood<sup>†</sup>, Megan Post<sup>†</sup>, Zahoor A. Shah<sup>†</sup>, Isaac T.  
Schiefer<sup>†\*</sup>*

<sup>†</sup>Department of Medicinal and Biological Chemistry, College of Pharmacy and Pharmaceutical Sciences, University of Toledo, Toledo, OH, 43614

<sup>‡</sup>Department of Pharmacology and Experimental Therapeutics, College of Pharmacy and Pharmaceutical Sciences, University of Toledo, Toledo, OH 43614

## List of Contents

- S3 Analysis Report ( $^1\text{H}$ ,  $^{13}\text{C}$ , HPLC-UV, HR-MS): **4a**
- S4 Analysis Report ( $^1\text{H}$ ,  $^{13}\text{C}$ , HPLC-UV, HR-MS): **4b**
- S5 Analysis Report ( $^1\text{H}$ ,  $^{13}\text{C}$ , HPLC-UV, HR-MS): **4c**
- S6 Analysis Report ( $^1\text{H}$ ,  $^{13}\text{C}$ , HPLC-UV, HR-MS): **4d**
- S7 Analysis Report ( $^1\text{H}$ ,  $^{13}\text{C}$ , HPLC-UV, HR-MS): **4e**
- S8 Analysis Report ( $^1\text{H}$ ,  $^{13}\text{C}$ , HPLC-UV, HR-MS): **4f**
- S9 Analysis Report ( $^1\text{H}$ ,  $^{13}\text{C}$ , HPLC-UV, HR-MS): **4g**
- S10 Analysis Report ( $^1\text{H}$ ,  $^{13}\text{C}$ , HPLC-UV, HR-MS): **4h**
- S11 Analysis Report ( $^1\text{H}$ ,  $^{13}\text{C}$ , HPLC-UV, HR-MS): **5a**
- S12 Analysis Report ( $^1\text{H}$ ,  $^{13}\text{C}$ , HPLC-UV, HR-MS): **5b**
- S13 Analysis Report ( $^1\text{H}$ ,  $^{13}\text{C}$ , HPLC-UV, HR-MS): **5c**
- S14 Analysis Report ( $^1\text{H}$ ,  $^{13}\text{C}$ , HPLC-UV, HR-MS): **5d**
- S15 Analysis Report ( $^1\text{H}$ ,  $^{13}\text{C}$ , HPLC-UV, HR-MS): **5e**
- S16 Analysis Report ( $^1\text{H}$ ,  $^{13}\text{C}$ , HPLC-UV, HR-MS): **5f**
- S17 Analysis Report ( $^1\text{H}$ ,  $^{13}\text{C}$ , HPLC-UV, HR-MS): **5g**
- S18 Analysis Report ( $^1\text{H}$ ,  $^{13}\text{C}$ , HPLC-UV, HR-MS): **5h**
- S19 Analysis Report ( $^1\text{H}$ ,  $^{13}\text{C}$ , HPLC-UV, HR-MS): **6a**
- S20 Analysis Report ( $^1\text{H}$ ,  $^{13}\text{C}$ , HPLC-UV, HR-MS): **7a**

# Analysis Report

## <sup>1</sup>H NMR

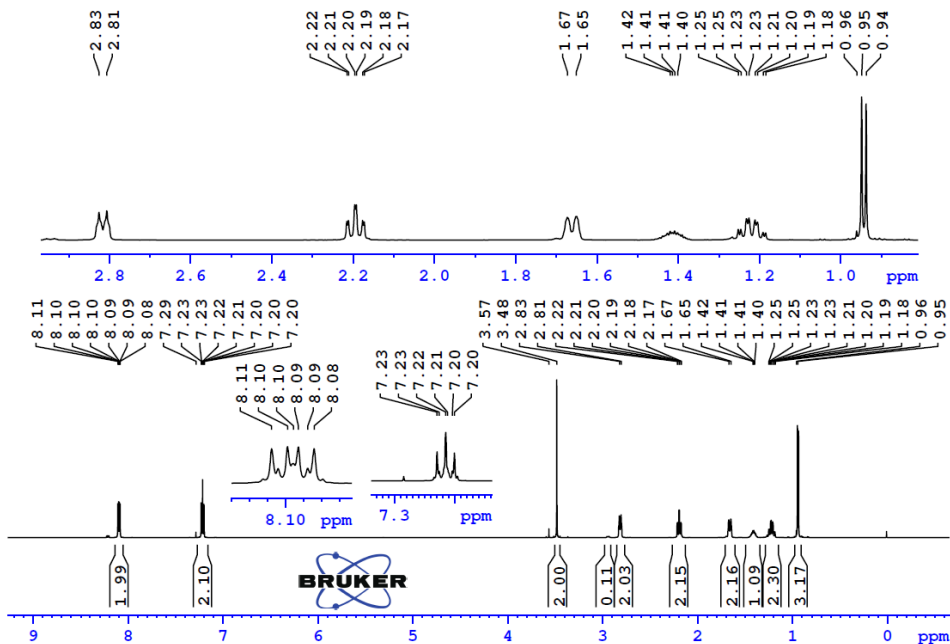

## <sup>13</sup>C NMR

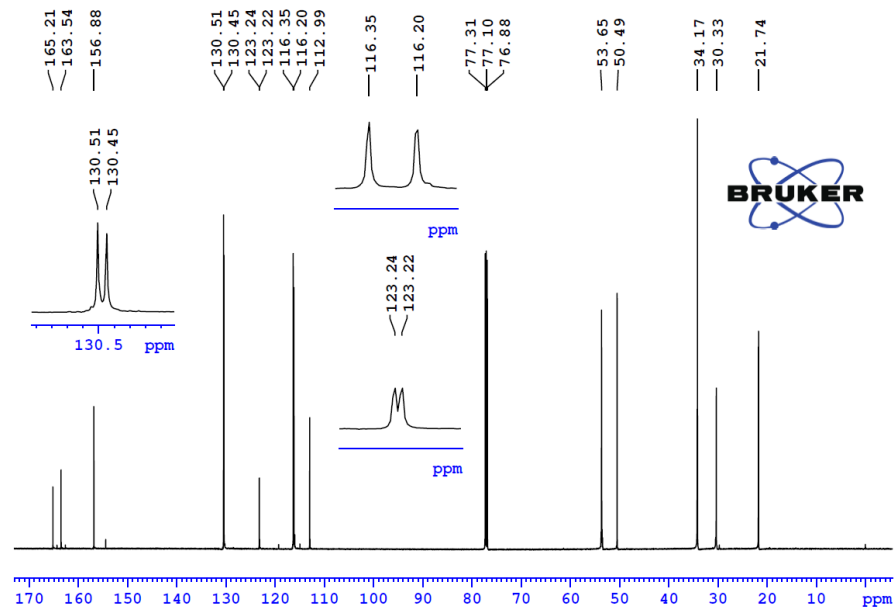

## HPLC purity (2 wavelength)

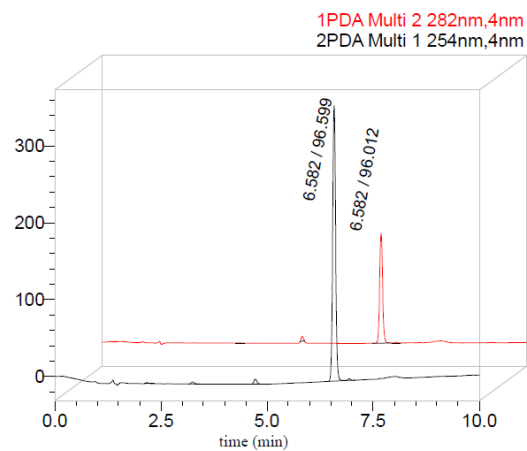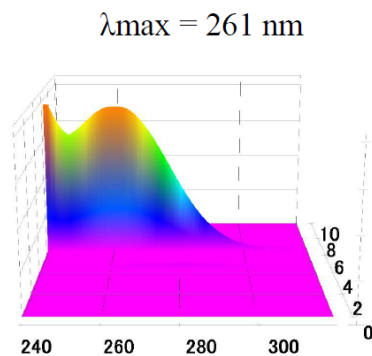

S3

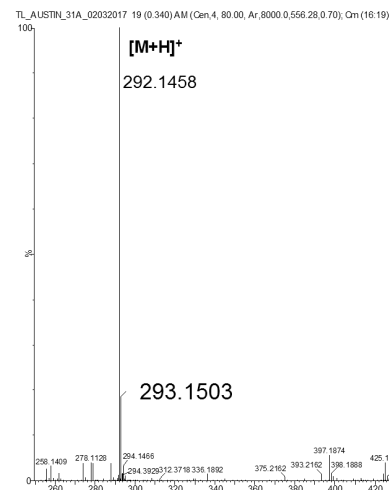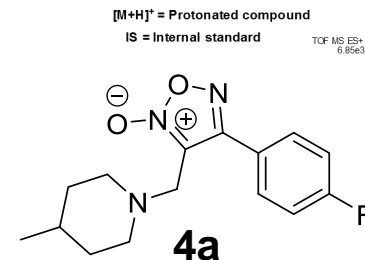

Mass Accuracy = ((292.1458-292.1461)/292.1461) \* 10<sup>6</sup> = -1.0 ppm

# Analysis Report

<sup>1</sup>H NMR

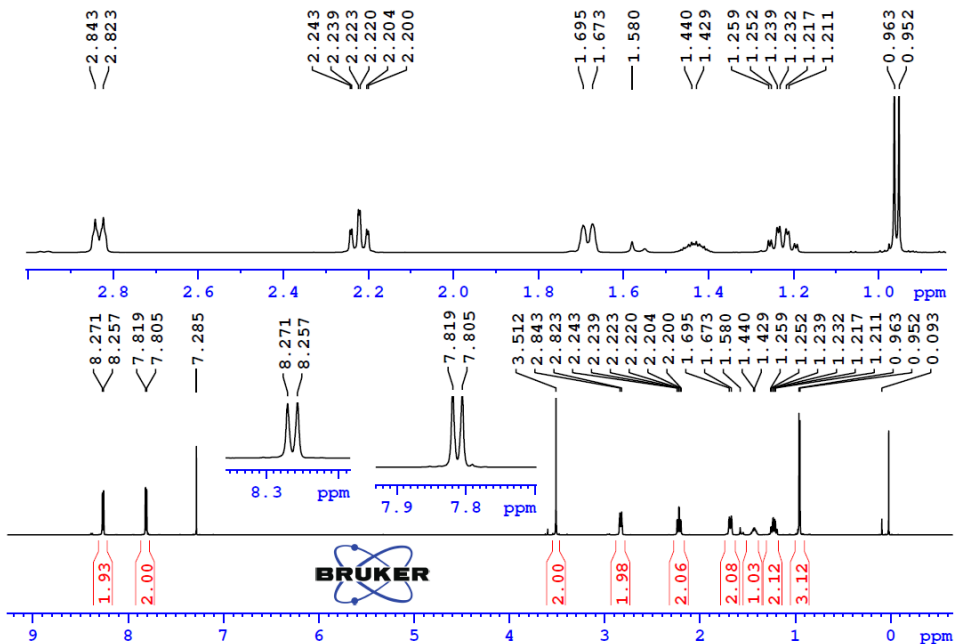

<sup>13</sup>C NMR

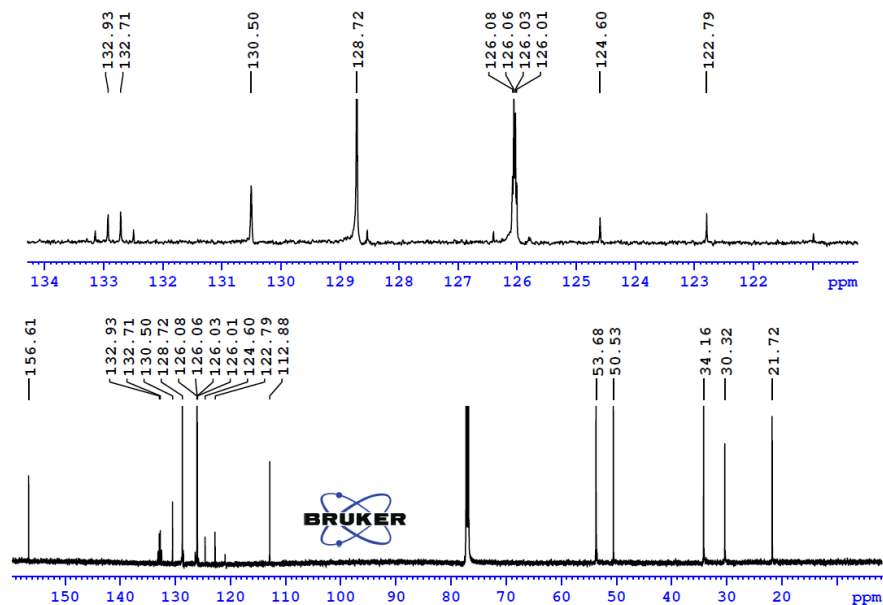

HPLC purity (2 wavelength)

1PDA Multi 2 282nm,4nm  
2PDA Multi 1 254nm,4nm

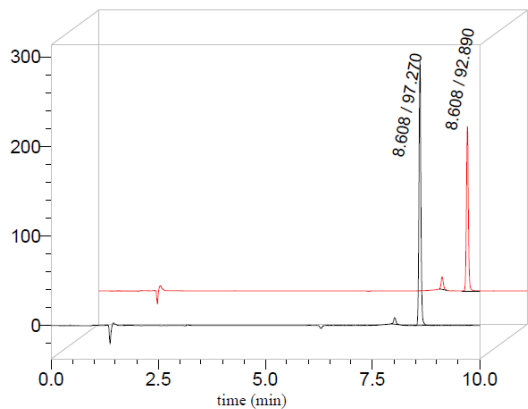

$\lambda_{max} = 263 \text{ nm}$

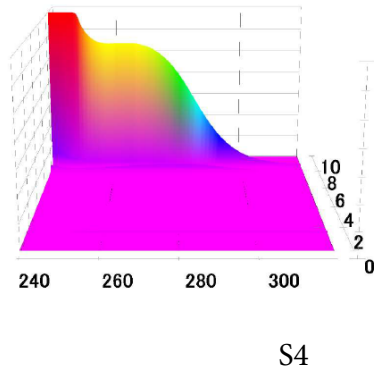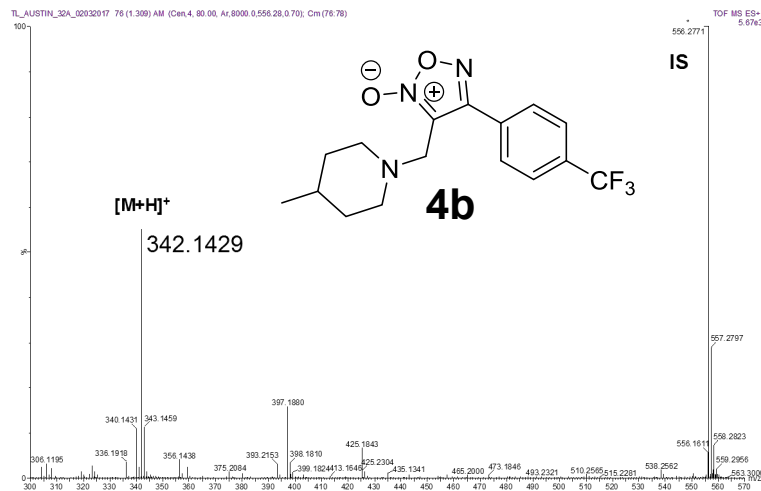

Mass Accuracy =  $((342.1429-342.1429)/342.1429) \times 10^6 = 0 \text{ ppm}$

# Analysis Report

## <sup>1</sup>H NMR

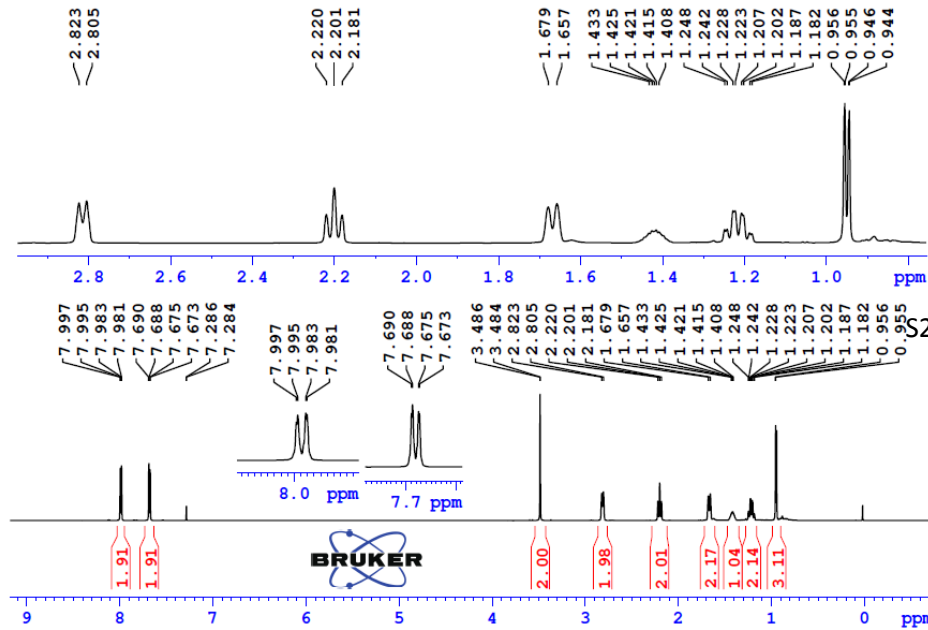

## <sup>13</sup>C NMR

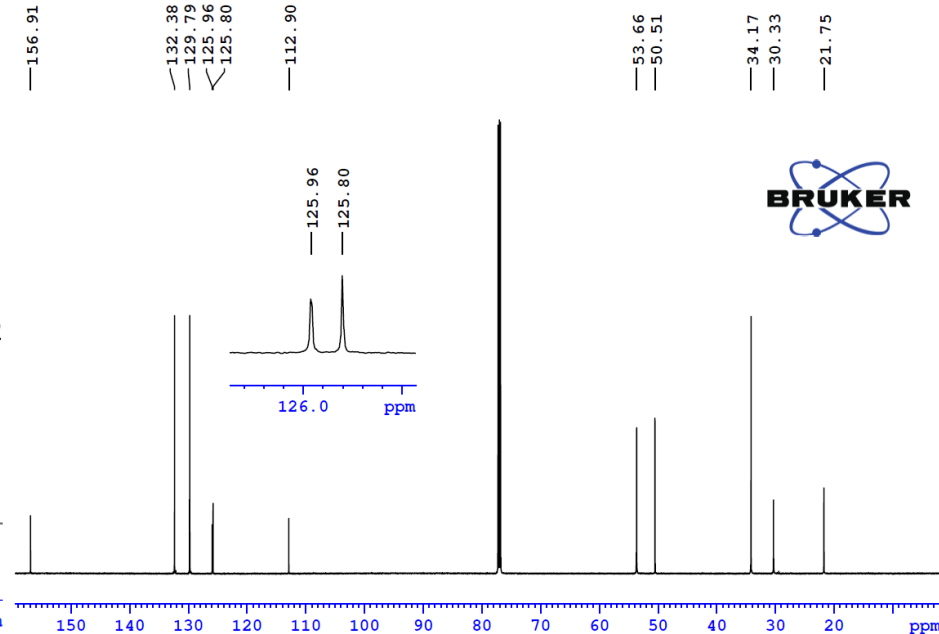

## HPLC purity (2 wavelength)

1PDA Multi 2 282nm,4nm  
2PDA Multi 1 254nm,4nm

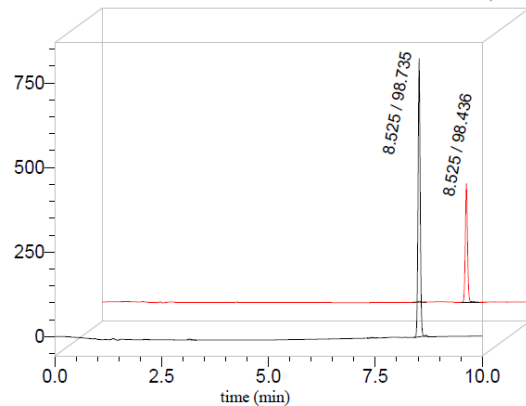

$\lambda_{max} = 233 \text{ nm}$

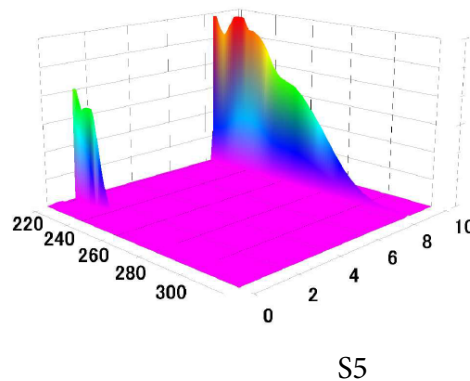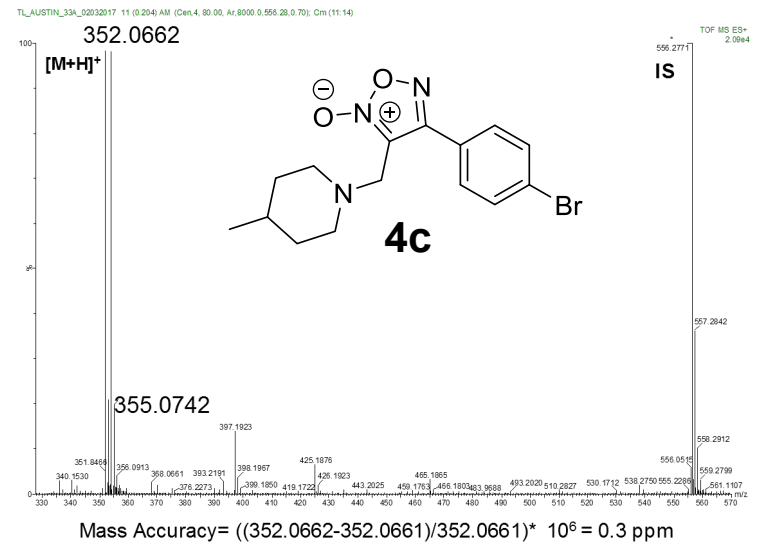

# Analysis Report

## <sup>1</sup>H NMR

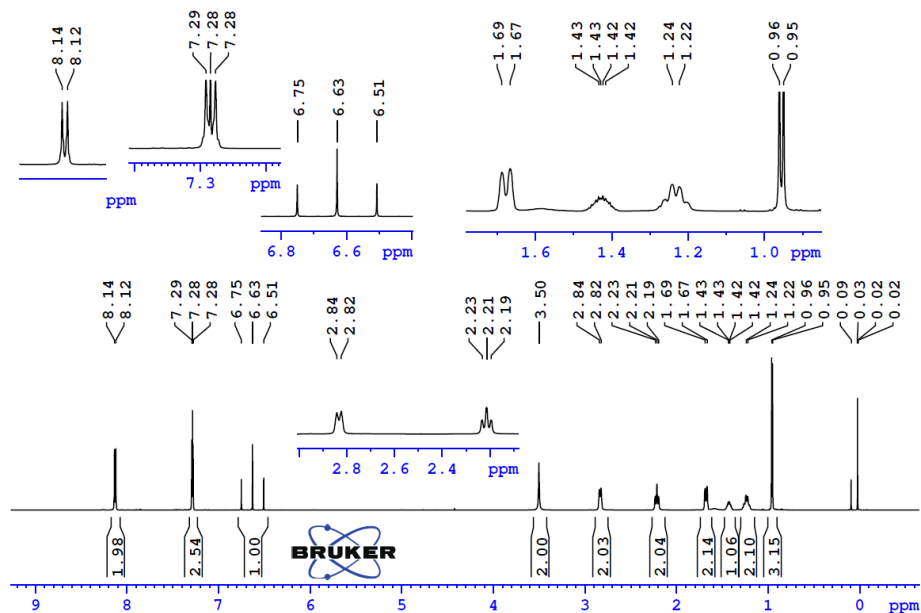

## <sup>13</sup>C NMR

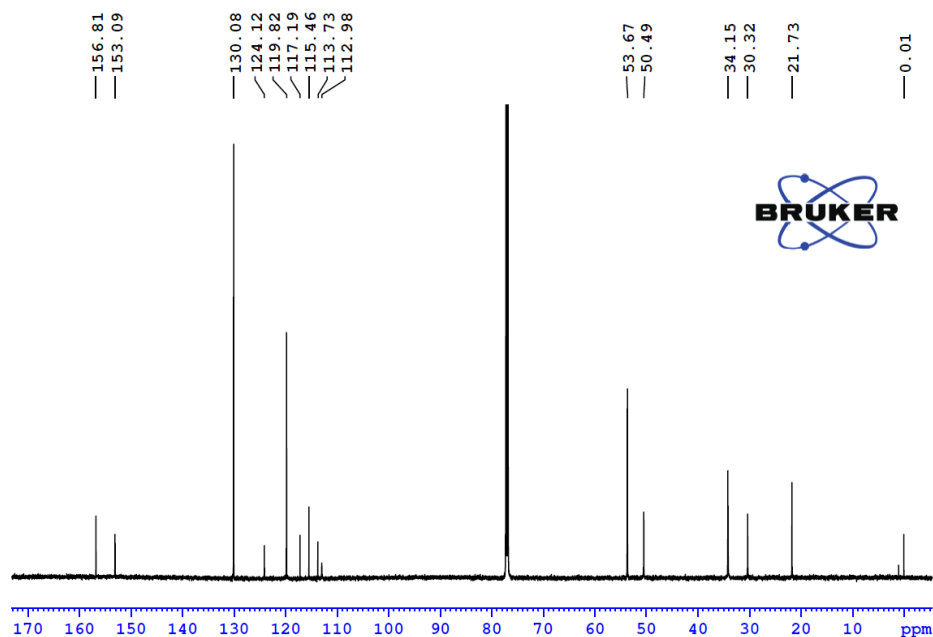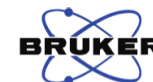

## HPLC purity (2 wavelength)

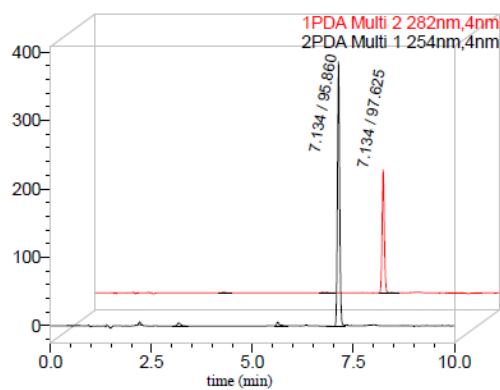

$\lambda_{max} = 261 \text{ nm}$

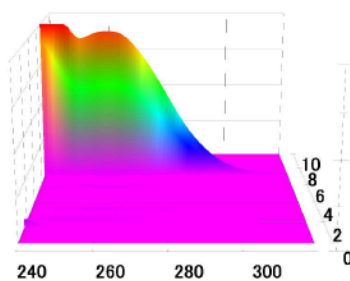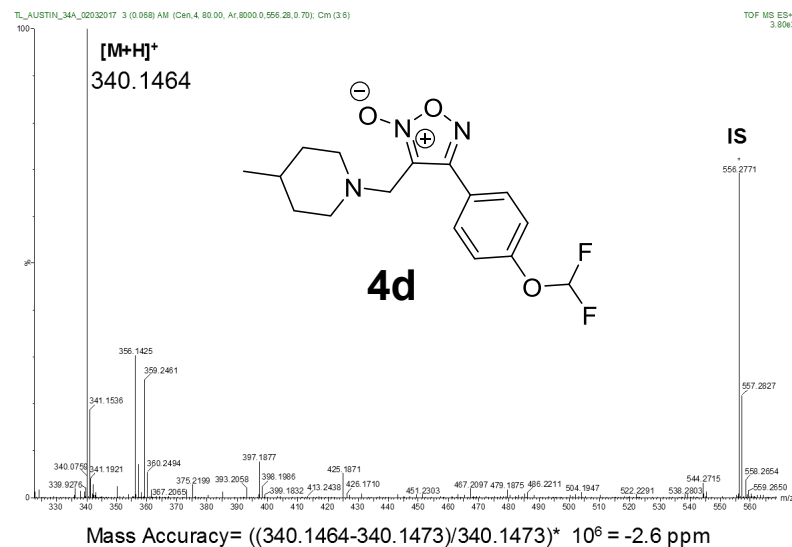

Mass Accuracy =  $\left(\frac{340.1464 - 340.1473}{340.1473}\right) \times 10^6 = -2.6 \text{ ppm}$

# Analysis Report

## <sup>1</sup>H NMR

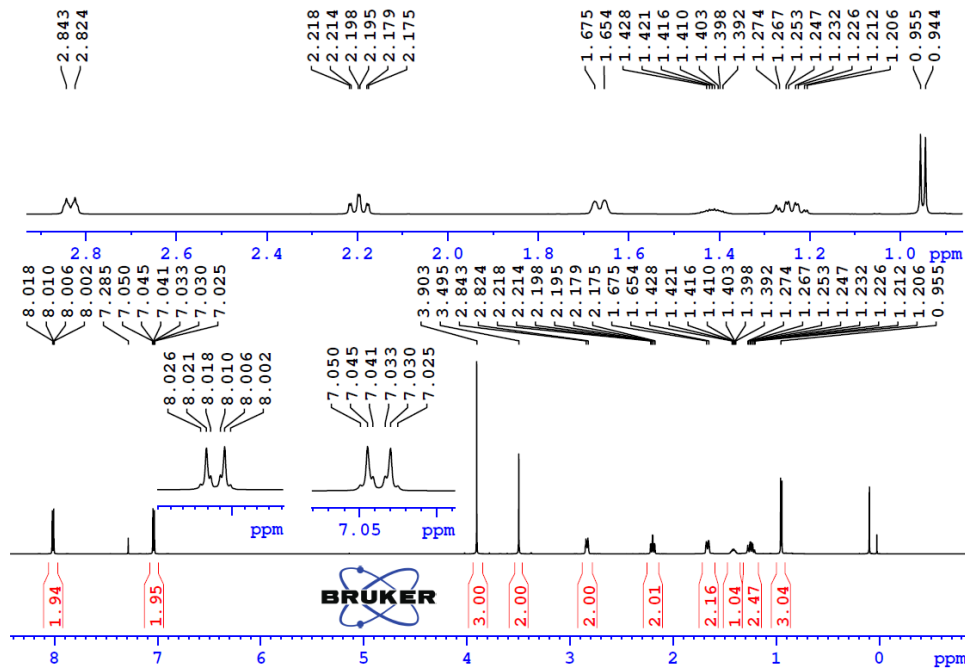

## <sup>13</sup>C NMR

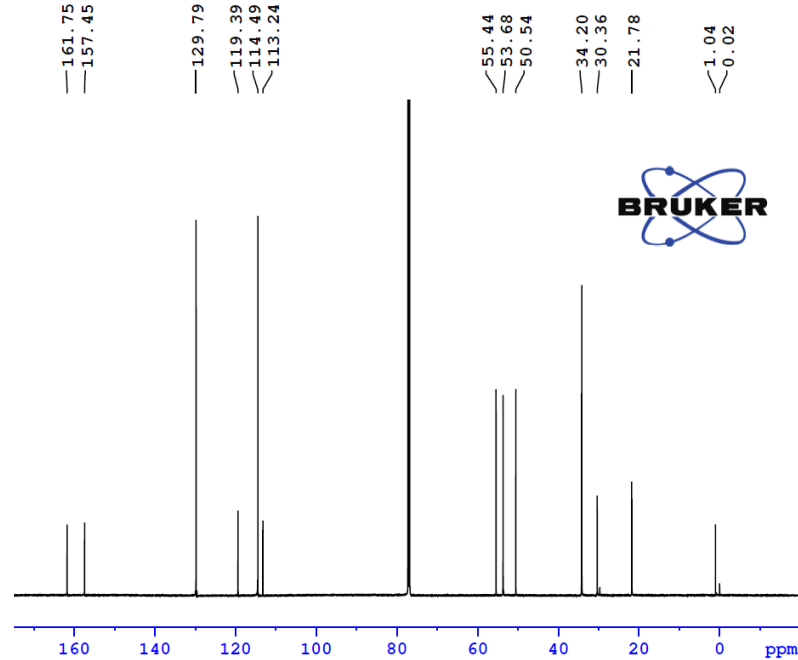

## HPLC purity (2 wavelength)

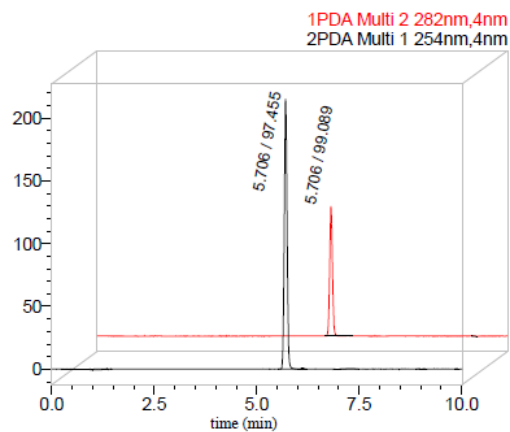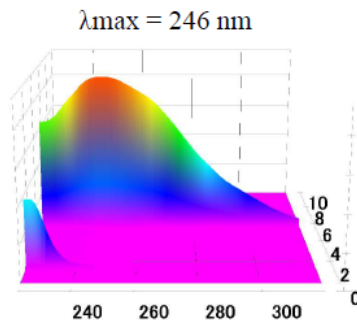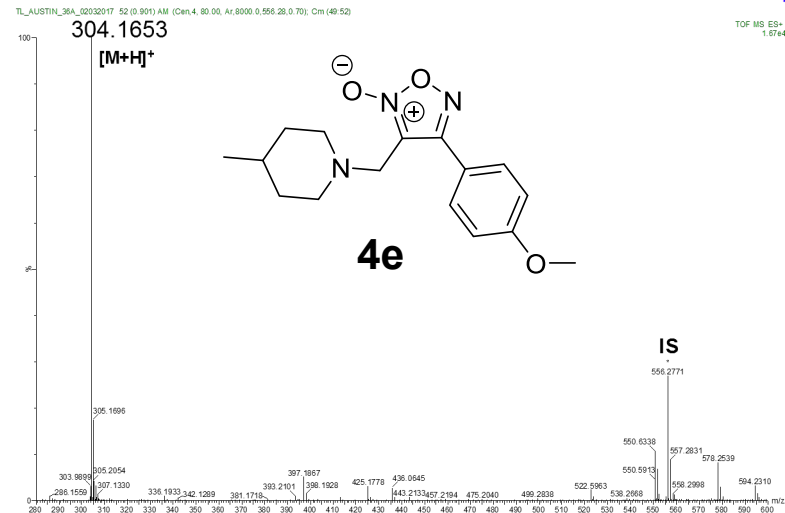

# Analysis Report

## <sup>1</sup>H NMR

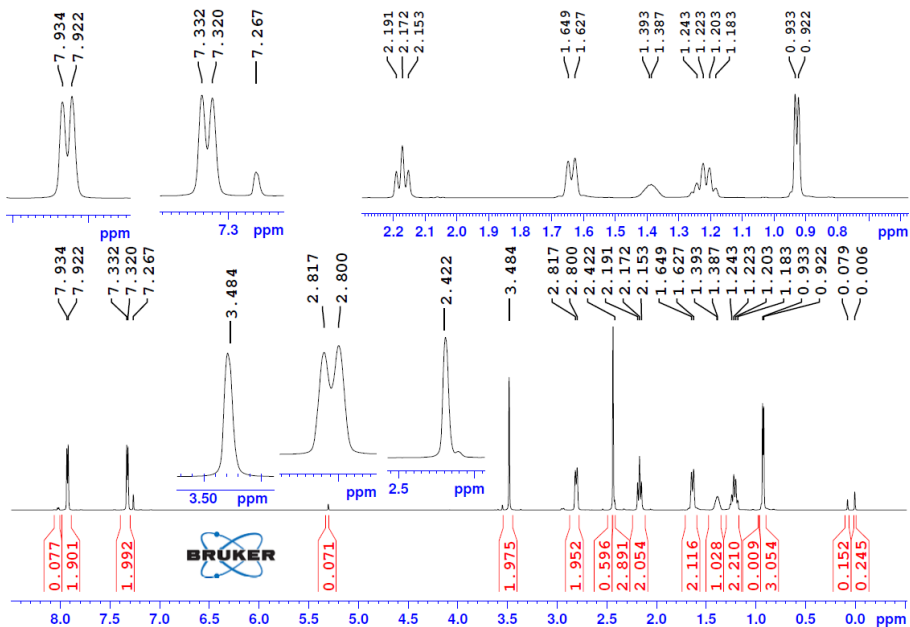

## <sup>13</sup>C NMR

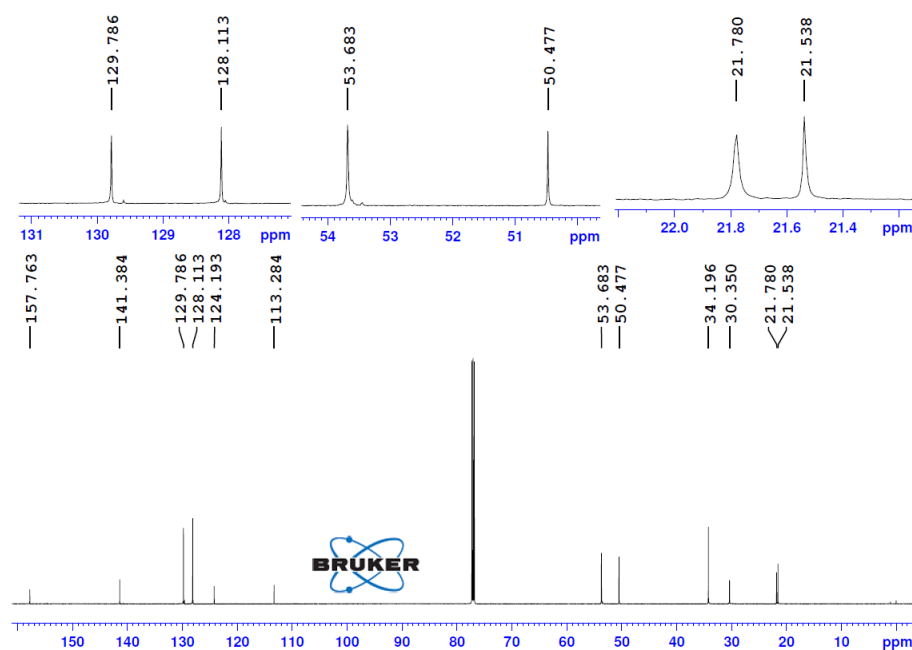

## HPLC purity (2 wavelength)

1PDA Multi 2 282nm,4nm  
1PDA Multi 2 254nm,4nm

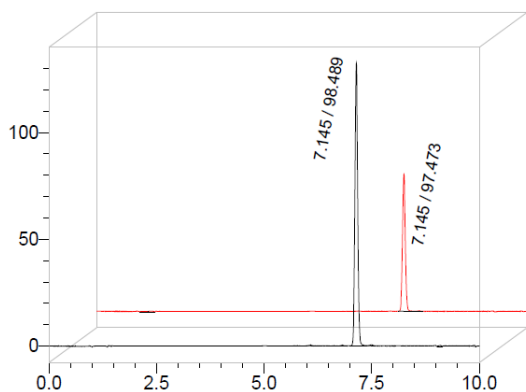

$\lambda_{max} = 233 \text{ nm}$

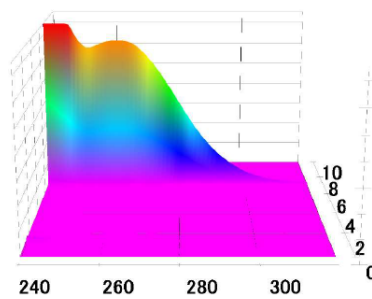

S8

TL\_AUSTIN\_38A\_02032017 39 (0.680) AM (C<sub>16</sub>H<sub>18</sub>N<sub>2</sub>O<sub>2</sub>, Ar: 8000, 0.556, 28.070), Cm (37.40)

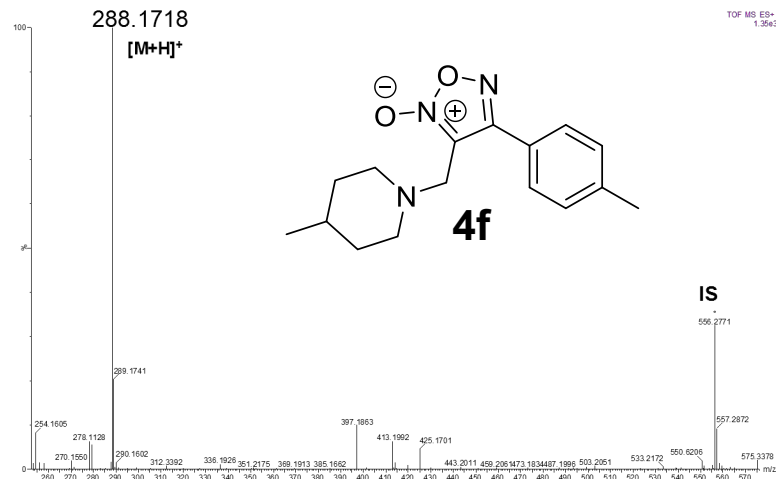



# Analysis Report

## <sup>1</sup>H NMR

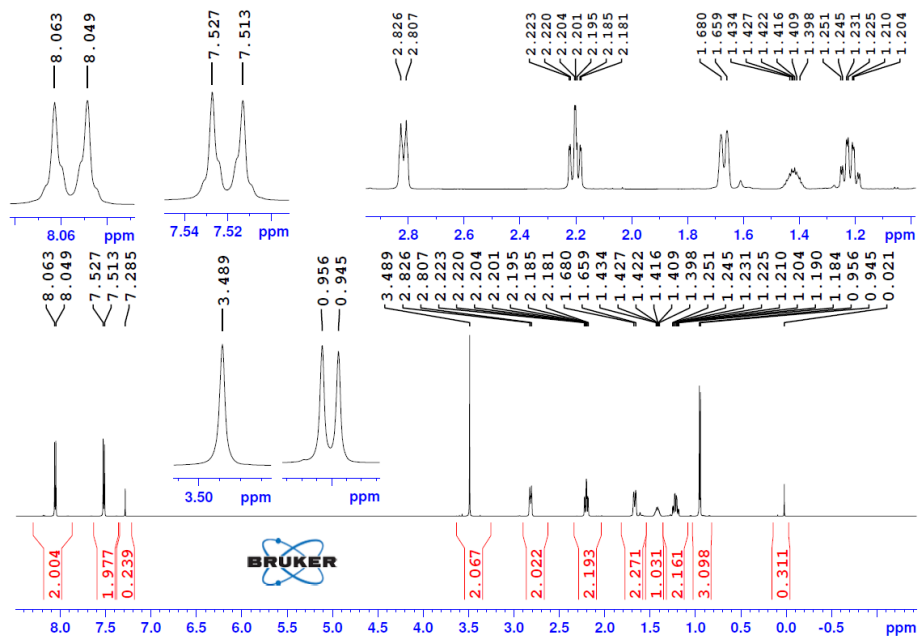

## <sup>13</sup>C NMR

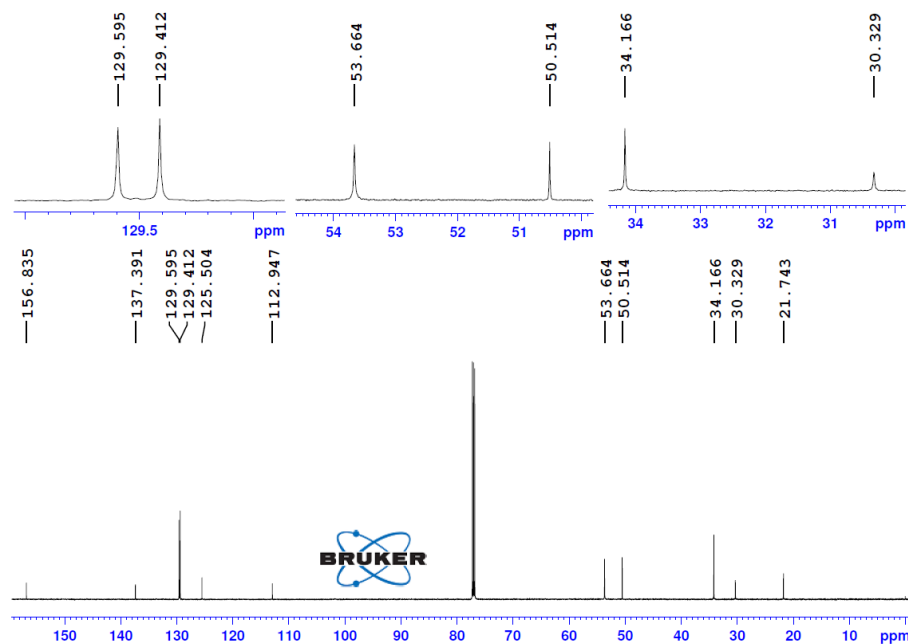

## HPLC purity (2 wavelength)

1PDA Multi 2 282nm,4nm  
2PDA Multi 1 254nm,4nm

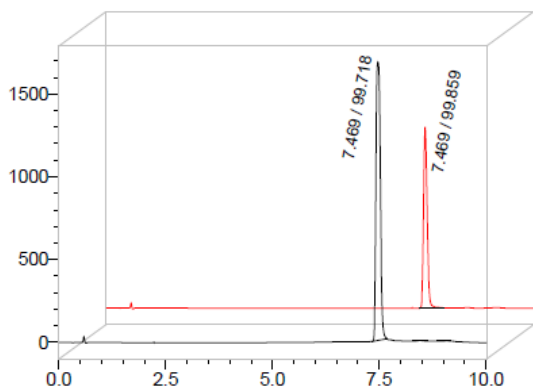

$\lambda_{max} = 256 \text{ nm}$

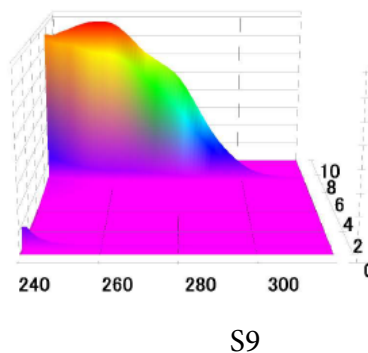

TL\_AUSTIN\_30A\_02032017 18 (0.323)AM (Cm.4, 80.00, Ar,8000,0.556,28.070), Cm (15:18)

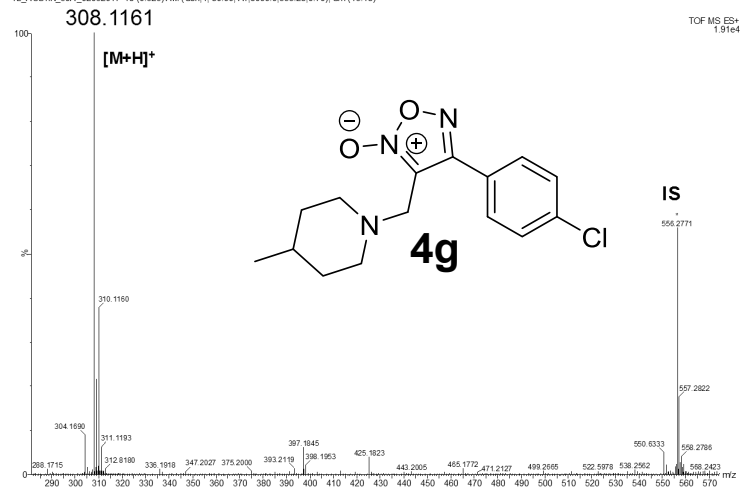

# Analysis Report

## <sup>1</sup>H NMR

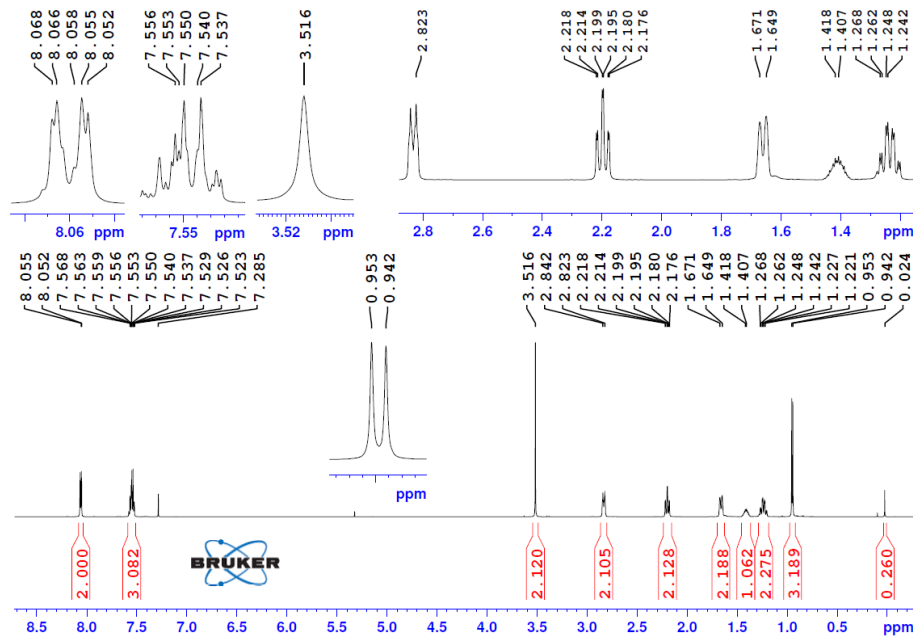

## <sup>13</sup>C NMR

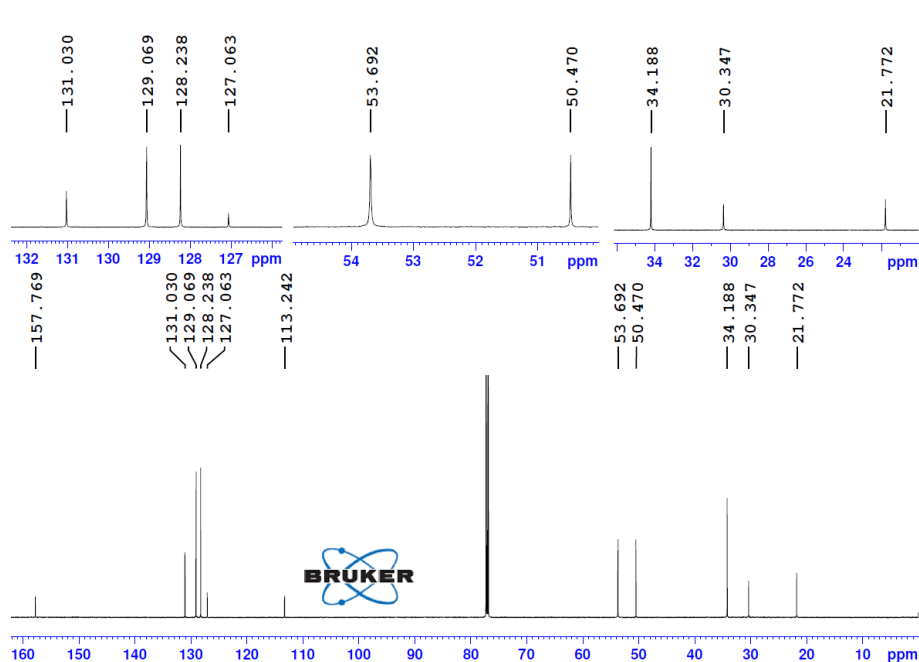

## HPLC purity (2 wavelength)

1PDA Multi 2 282nm,4nm  
2PDA Multi 1 254nm,4nm

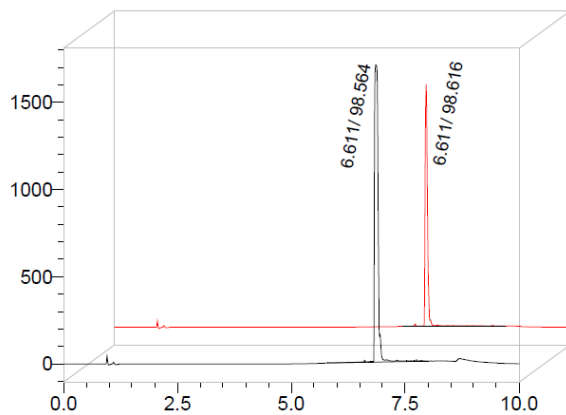

$\lambda_{max} = 257 \text{ nm}$

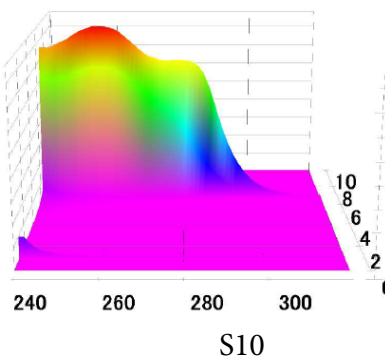

TL\_AUSTIN\_45A\_02032017 3 (0.68) AM (Cen.4, 80.00, Ar:8000.0,566.28,0.70); Cm (2:4)

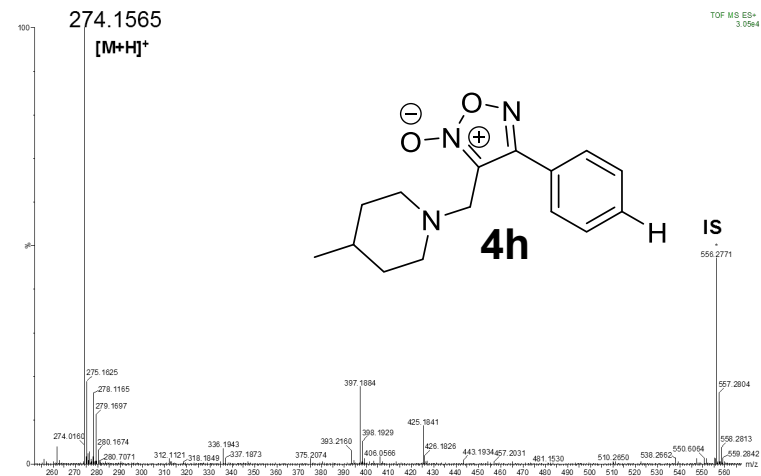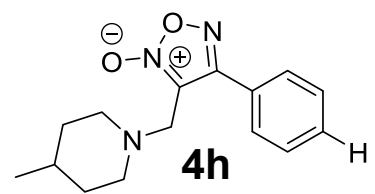

Mass Accuracy =  $\frac{(274.1565 - 274.1556)}{274.1556} \times 10^6 = -3.3 \text{ ppm}$

# Analysis Report

## <sup>1</sup>H NMR

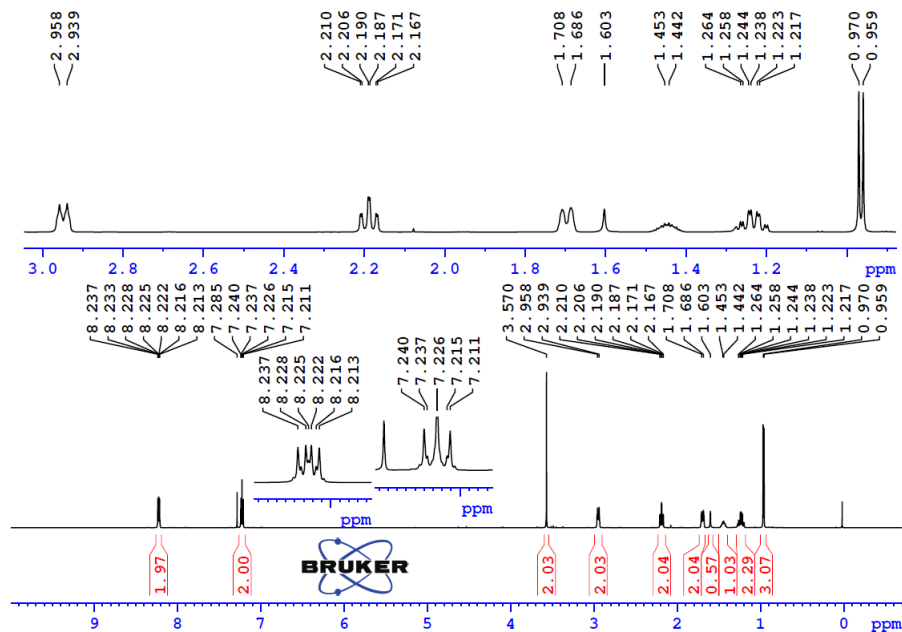

## <sup>13</sup>C NMR

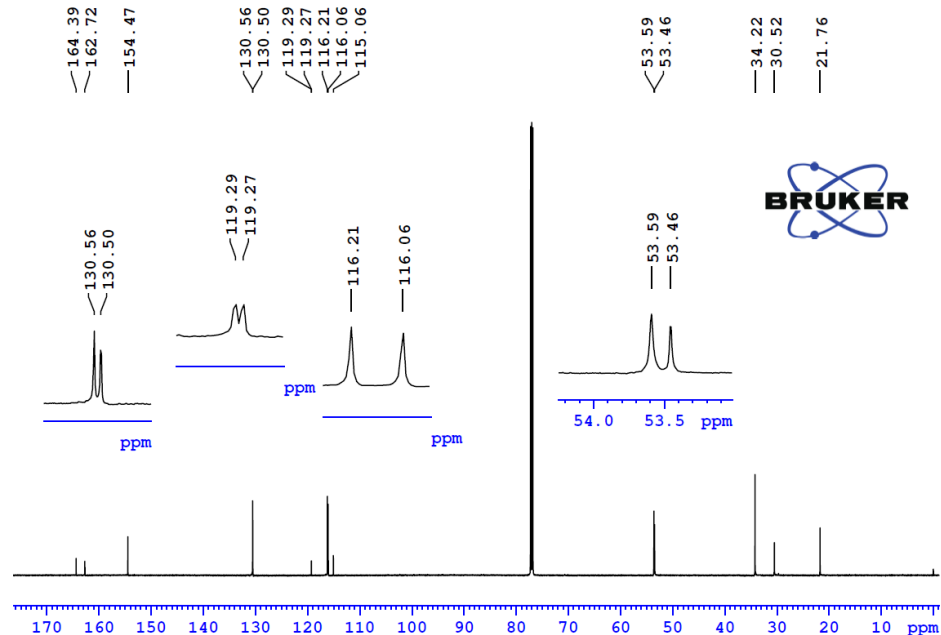

## HPLC purity (2 wavelength)

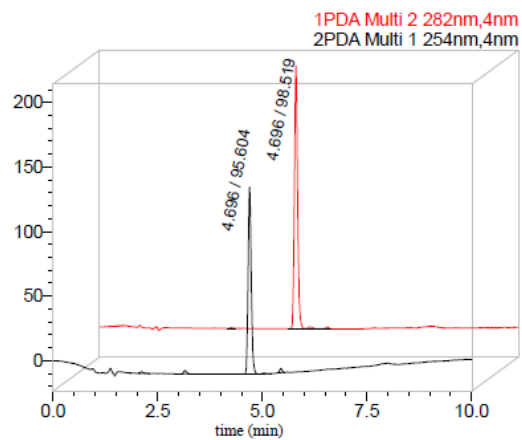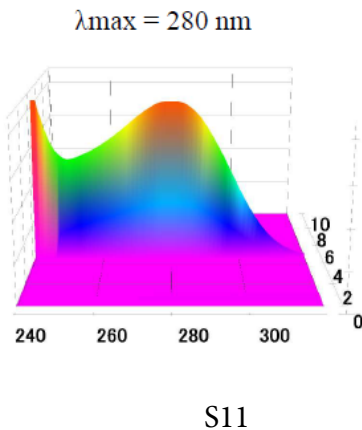

TL\_AUSTIN\_31B\_02032017 1 (0.034) AM (Gen4, 80.00, Ar, 8000.0, 556.28, 0.70), Cm (1.4)

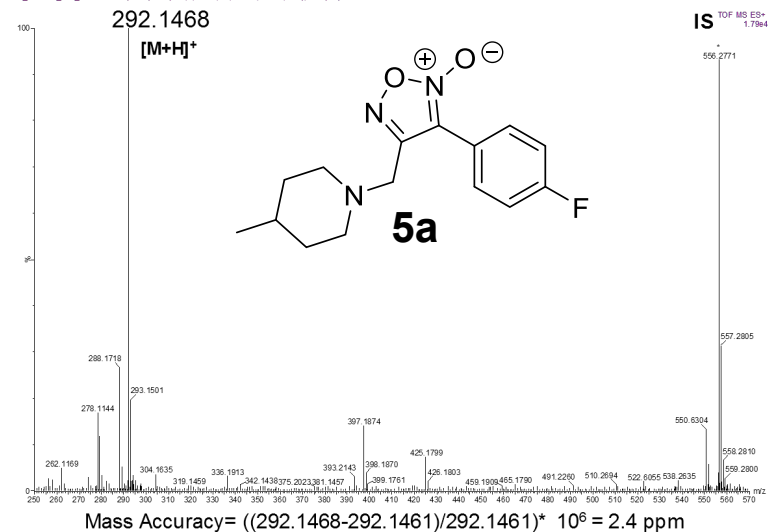



# Analysis Report

## $^1\text{H}$ NMR

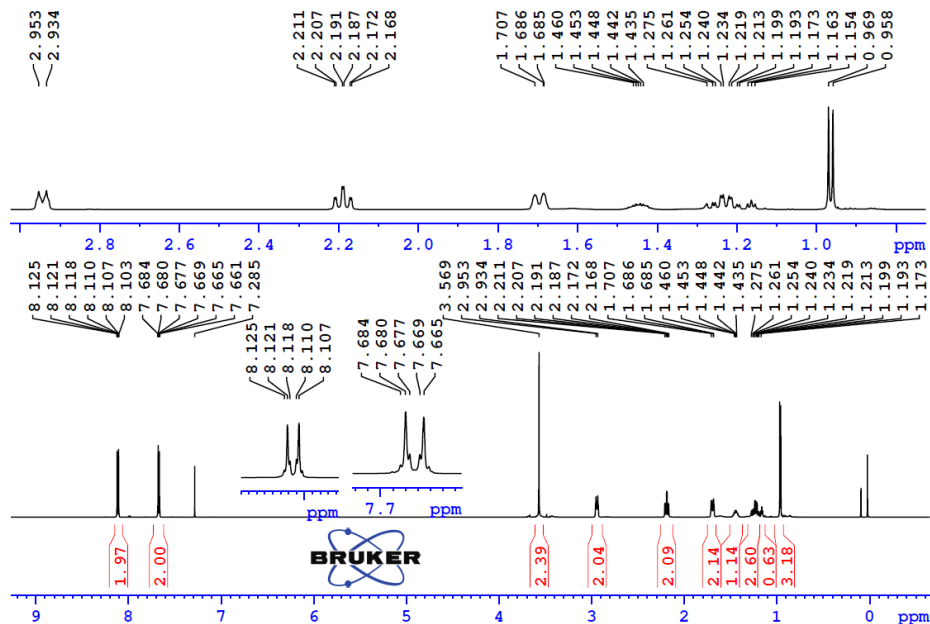

## $^{13}\text{C}$ NMR

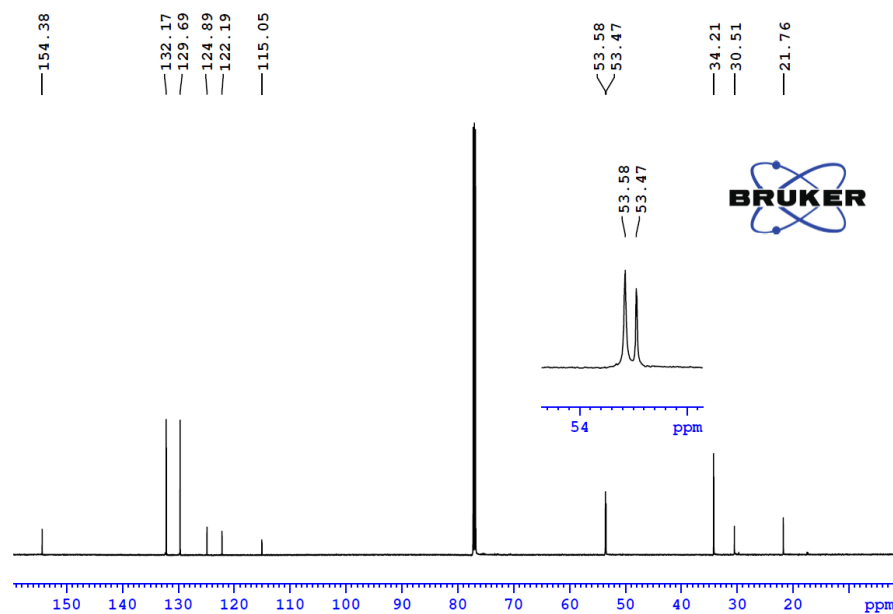

## HPLC purity (2 wavelength)

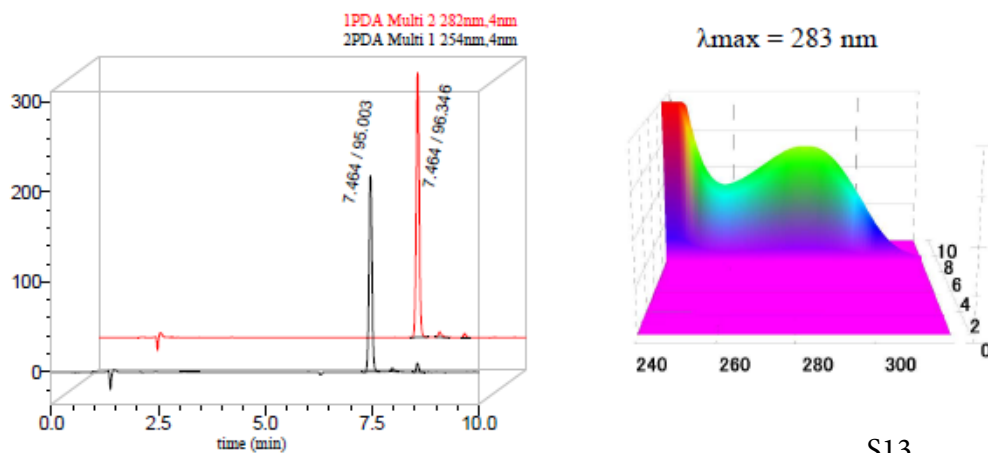

S13

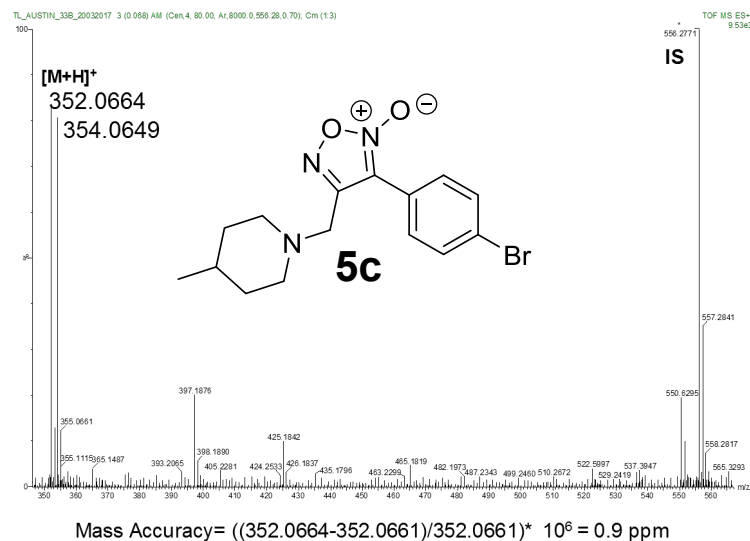

# Analysis Report

## <sup>1</sup>H NMR

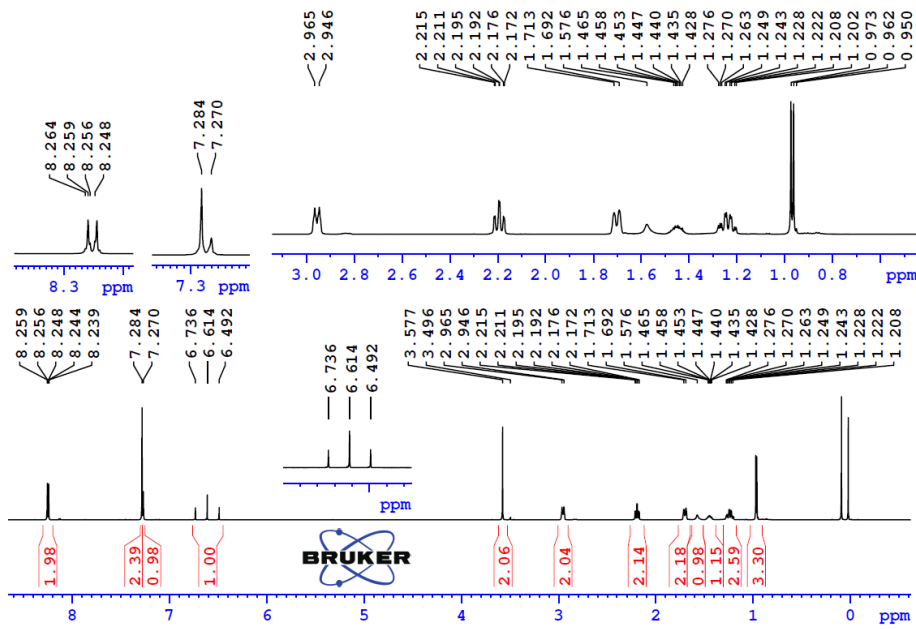

## <sup>13</sup>C NMR

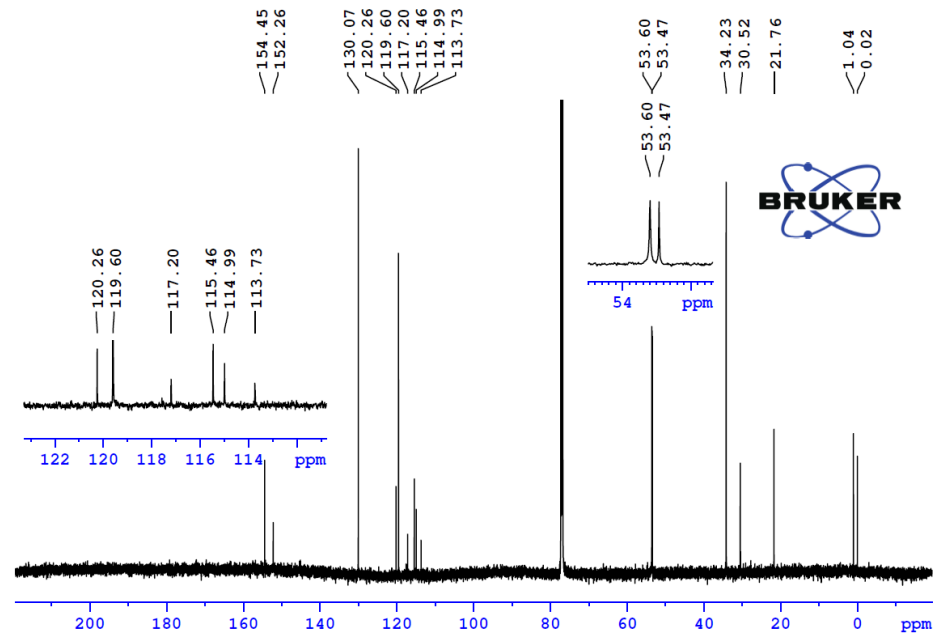

## HPLC purity (2 wavelength)

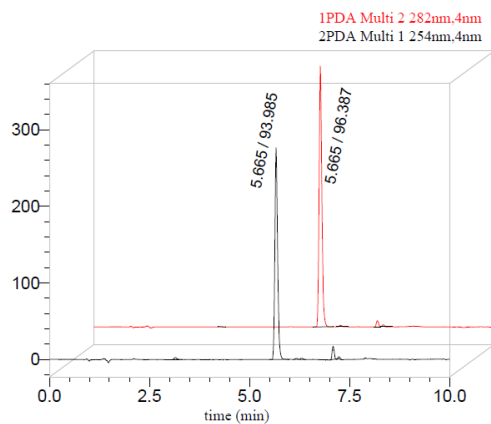

$\lambda_{max} = 281 \text{ nm}$

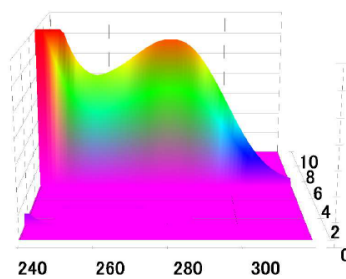

S14

TL\_AUSTIN\_34B\_200202017 1 (0.034 AM) (Cen:4.80.00, Ar:8000.0,556.28,0.70); Cm (1.3)

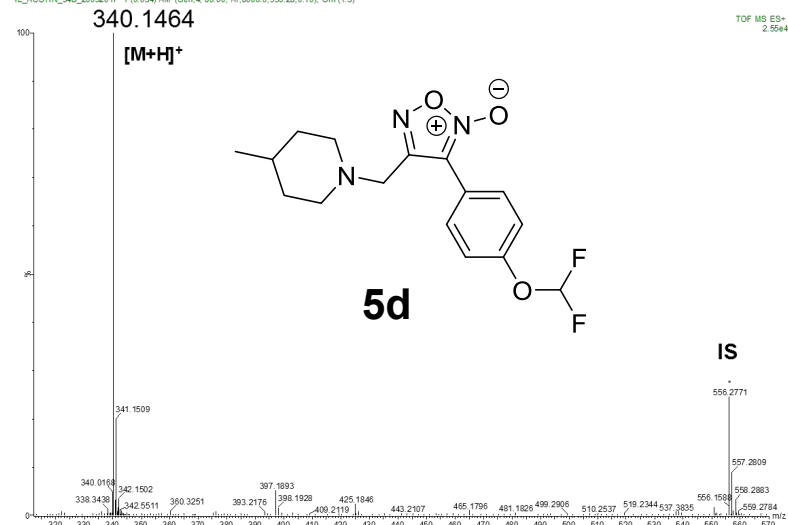

Mass Accuracy =  $\left(\frac{340.1764 - 340.1473}{340.1473}\right) \times 10^6 = -2.6 \text{ ppm}$

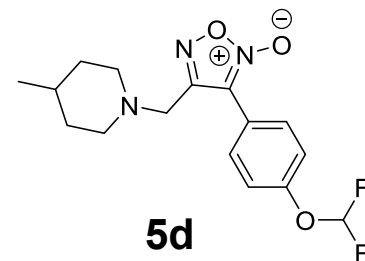

IS

# Analysis Report

## <sup>1</sup>H NMR

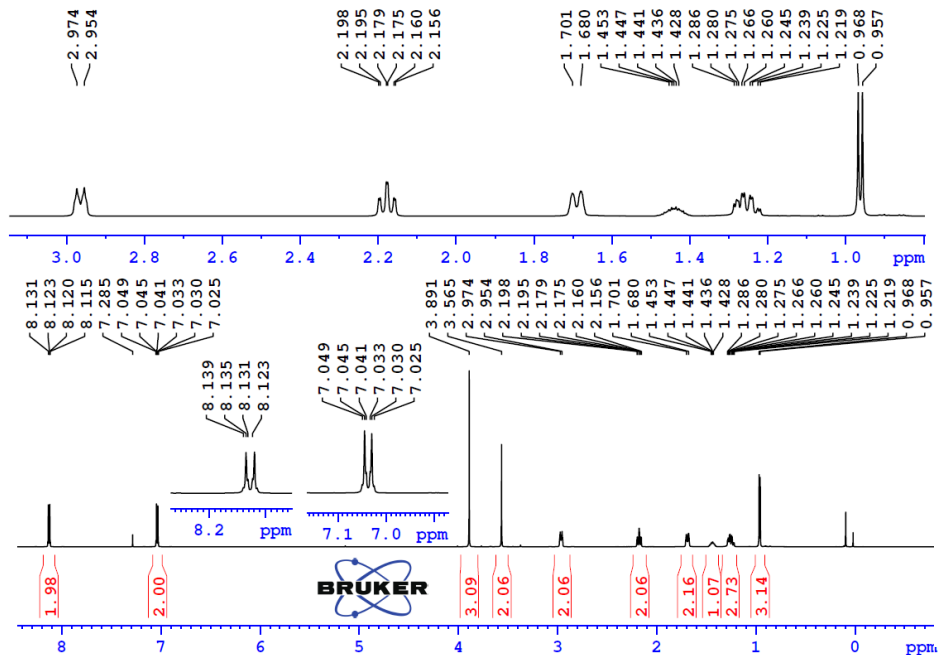

## <sup>13</sup>C NMR

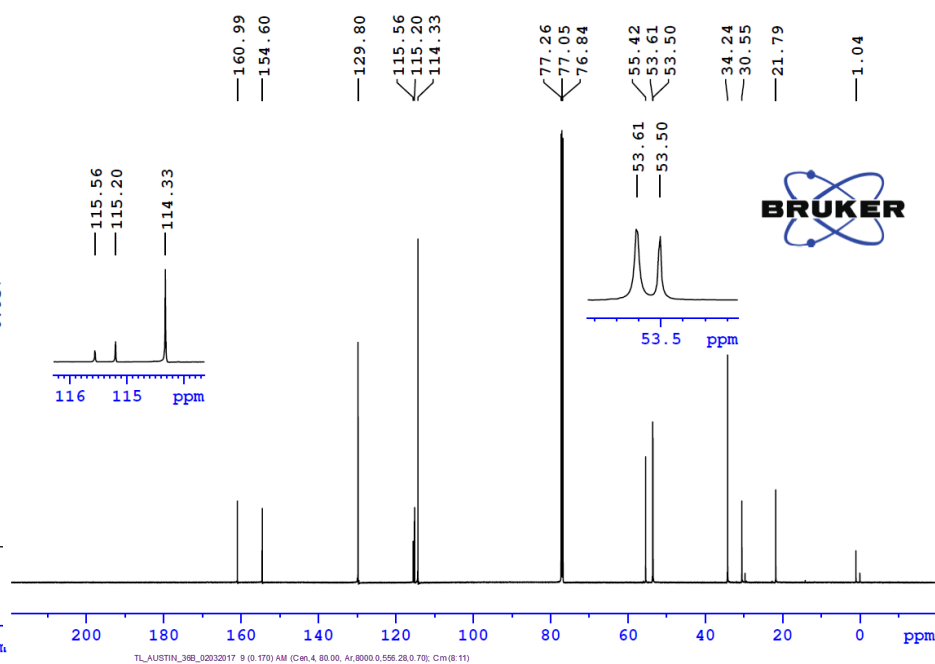

## HPLC purity (2 wavelength)

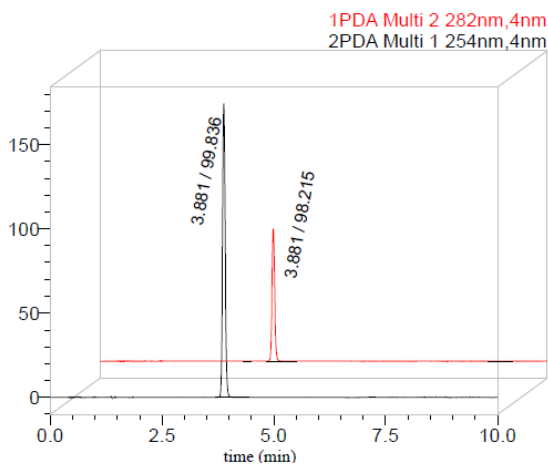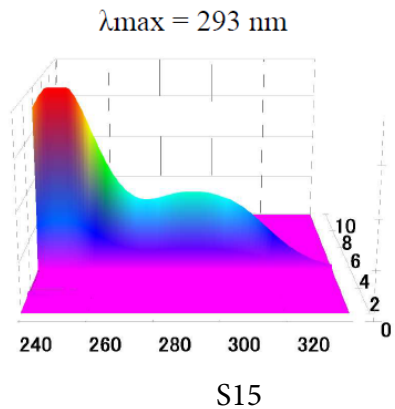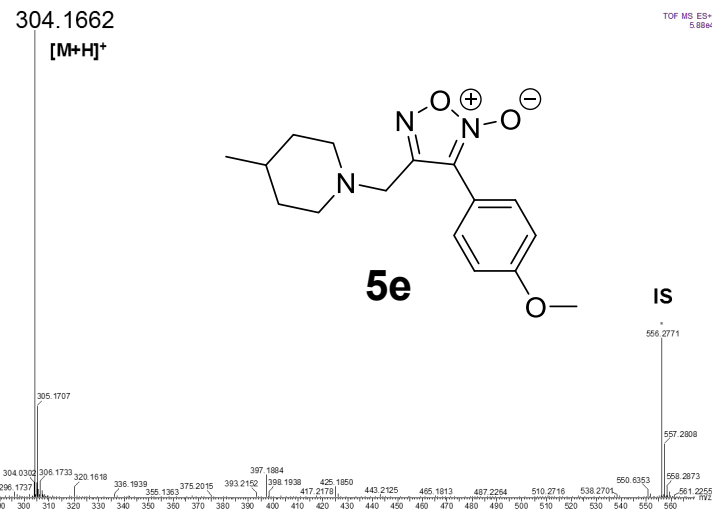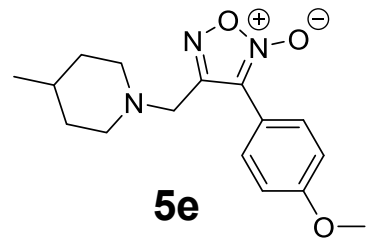

Mass Accuracy = ((304.1662-304.1661)/304.1661) \* 10<sup>6</sup> = 0.3 ppm

# Analysis Report

## <sup>1</sup>H NMR

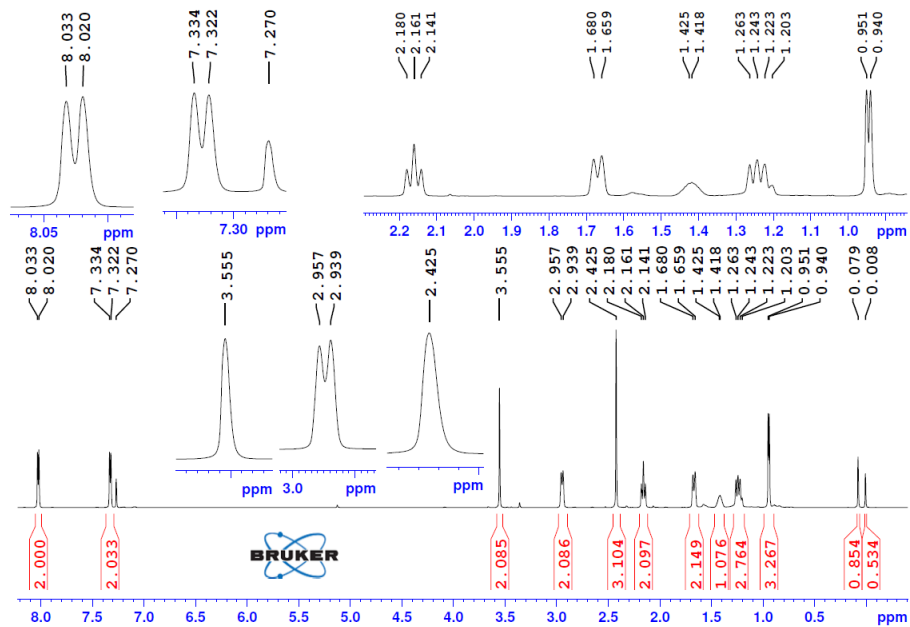

## <sup>13</sup>C NMR

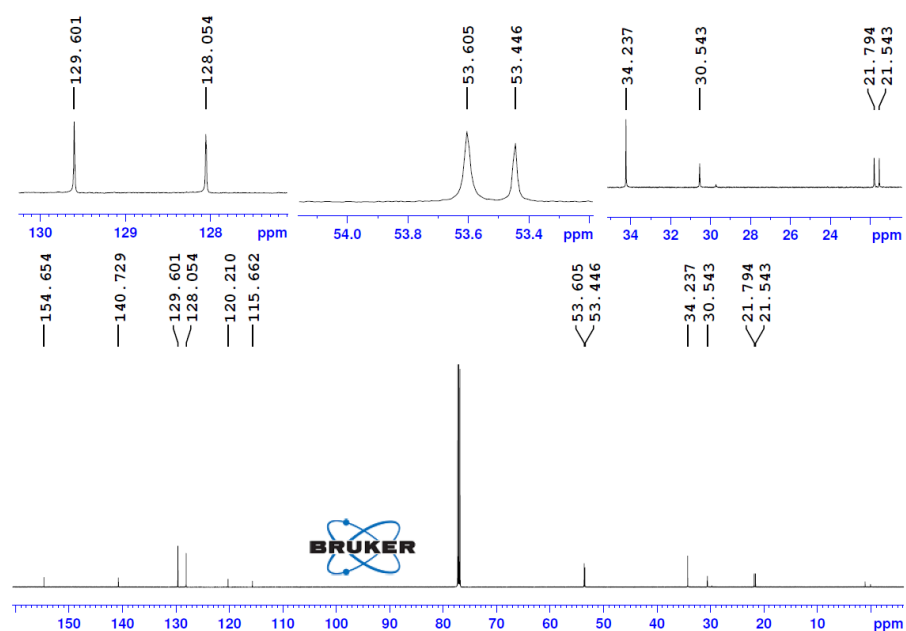

## HPLC purity (2 wavelength)

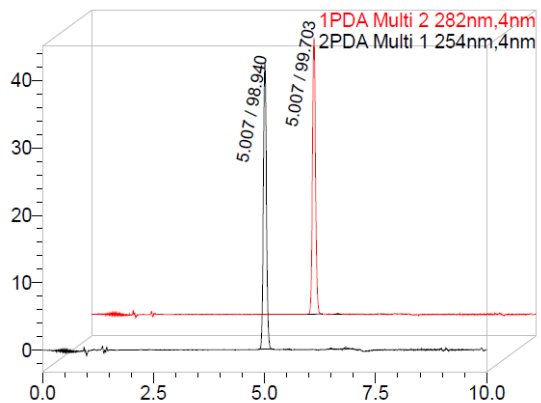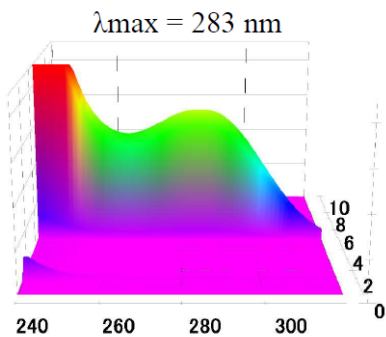

S16

TL\_AUSTIN\_37B\_20032017\_2\_53 (0.918) AM (Cen.4, 80.00, Ar.8000,0.556,28.0,70), Cm (53.54)

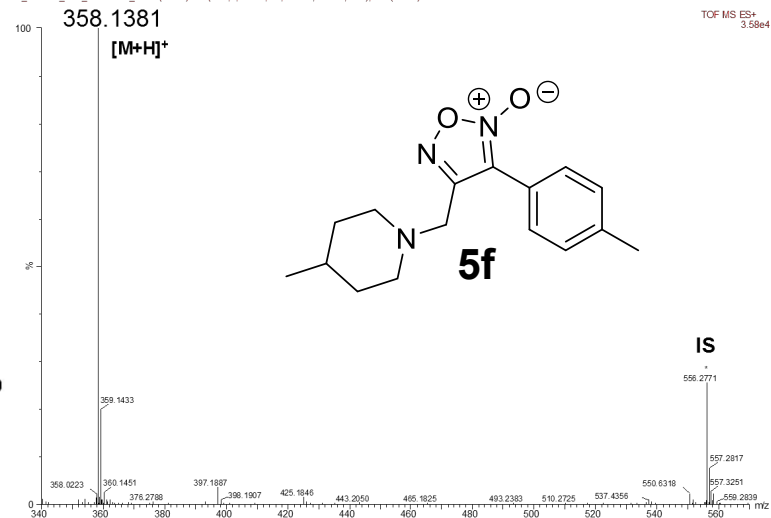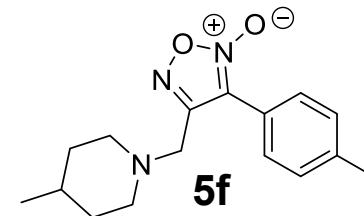

Mass Accuracy =  $\frac{(358.1381 - 358.1379)}{358.1379} \times 10^6 = 0.6 \text{ ppm}$



# Analysis Report

## <sup>1</sup>H NMR

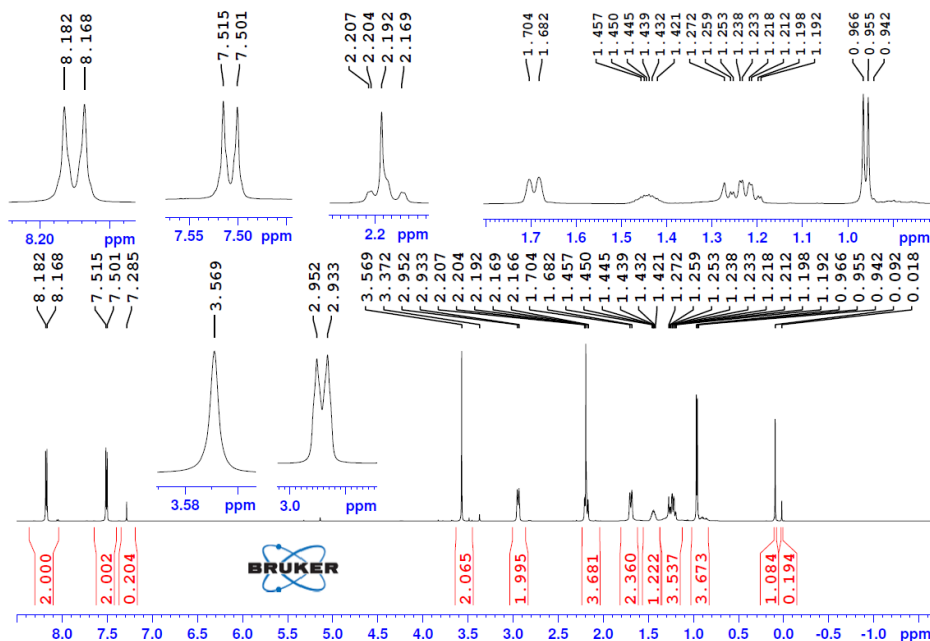

## <sup>13</sup>C NMR

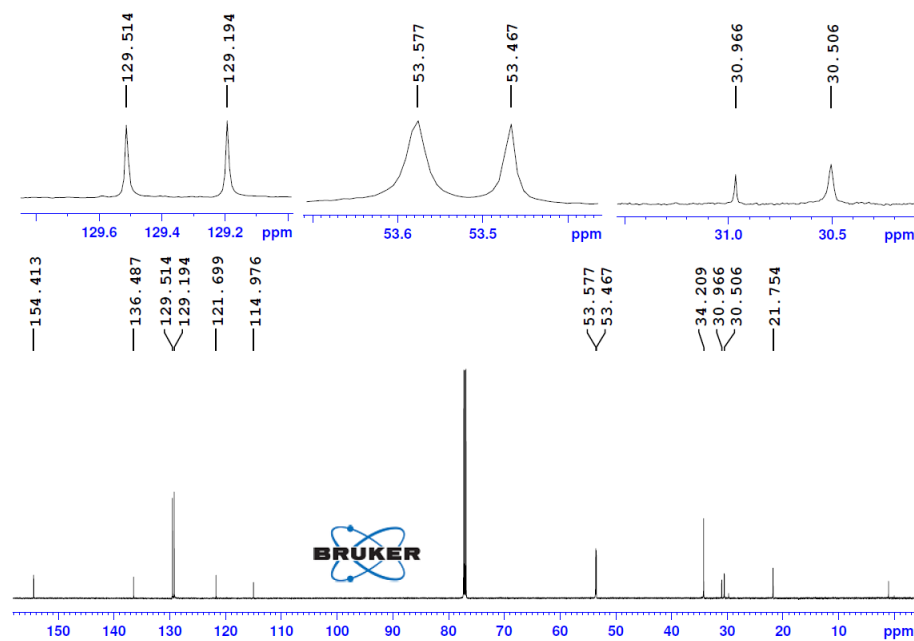

## HPLC purity (2 wavelength)

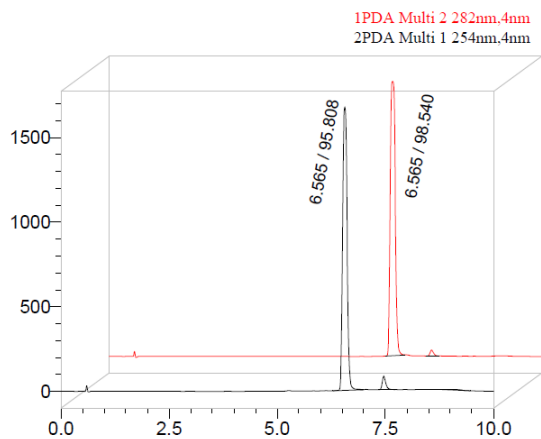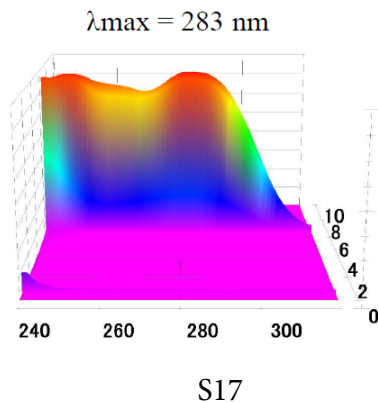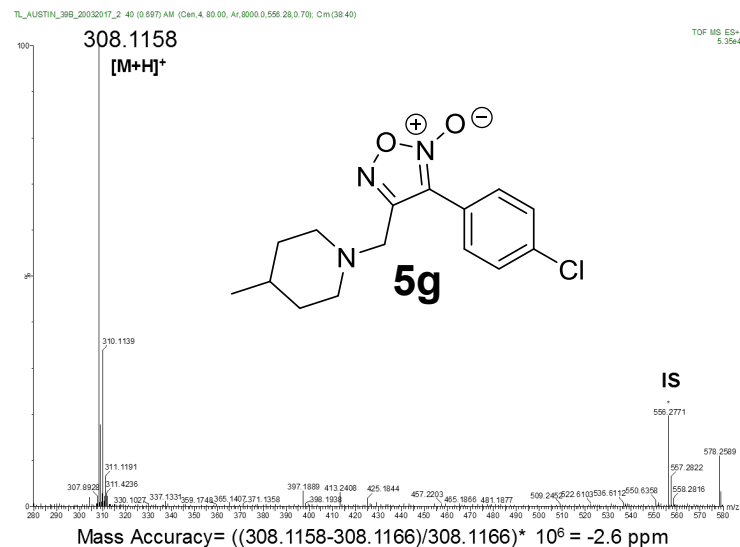

# Analysis Report

## <sup>1</sup>H NMR

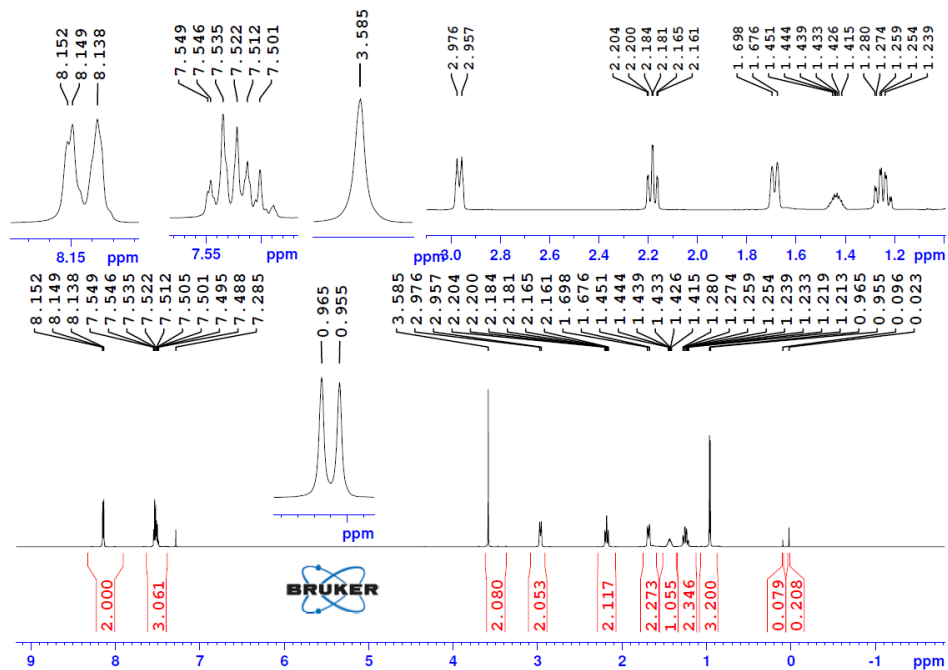

## <sup>13</sup>C NMR

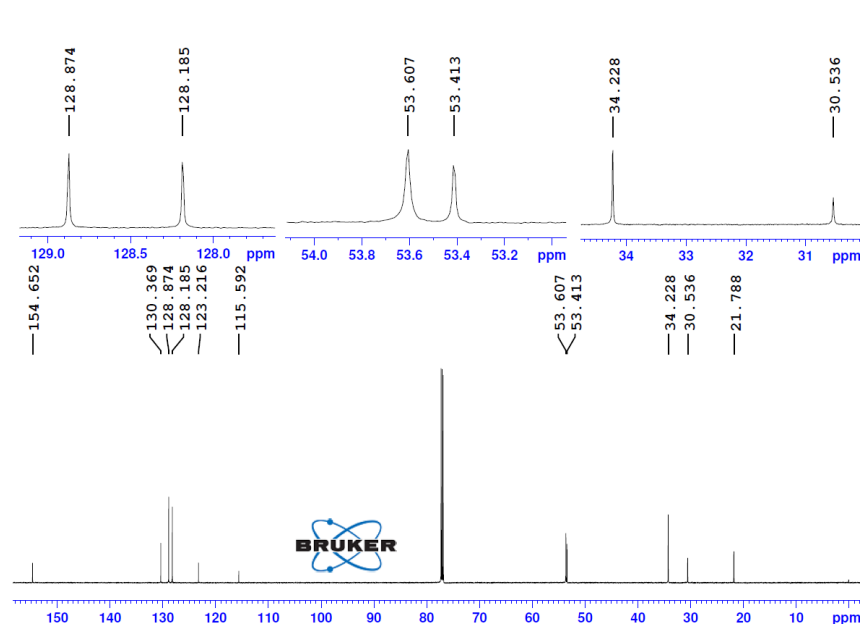

## HPLC purity (2 wavelength)

1PDA Multi 2 282nm,4mm  
2PDA Multi 1 254nm,4mm

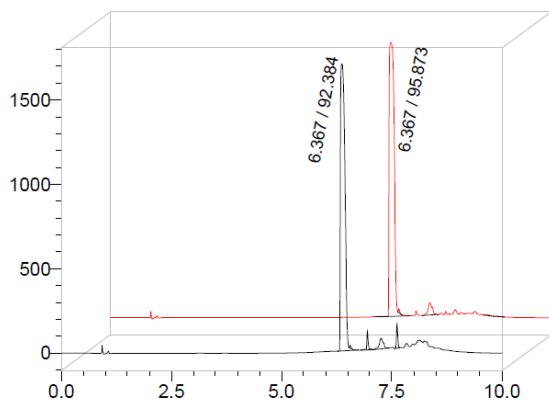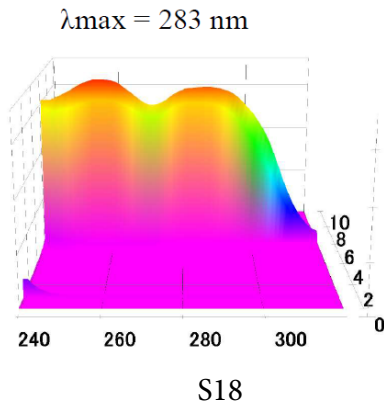

TL\_AUSTIN\_408\_02032017 10 (0.187) AM (C16H4, 80.00, Ar:8000 0.556,28.0,70), Cm(10:12)

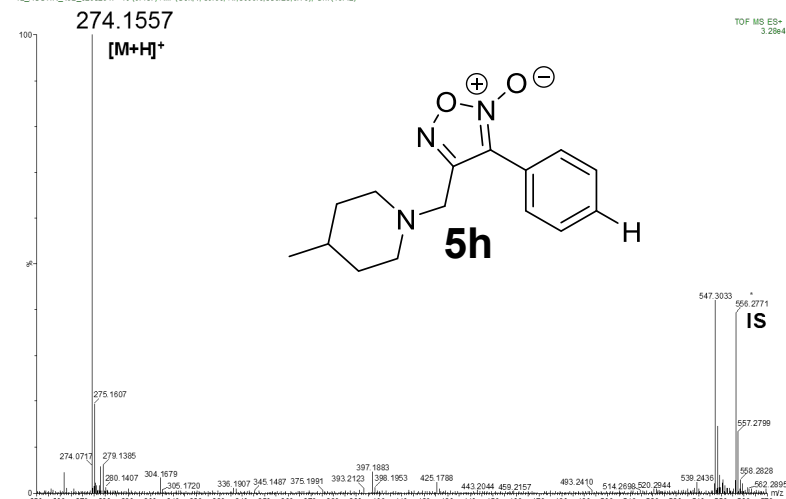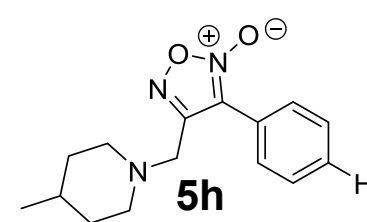

Mass Accuracy = ((274.1557-274.1556)/274.1556) \* 10<sup>6</sup> = 0.4 ppm

# Analysis Report

<sup>1</sup>H NMR

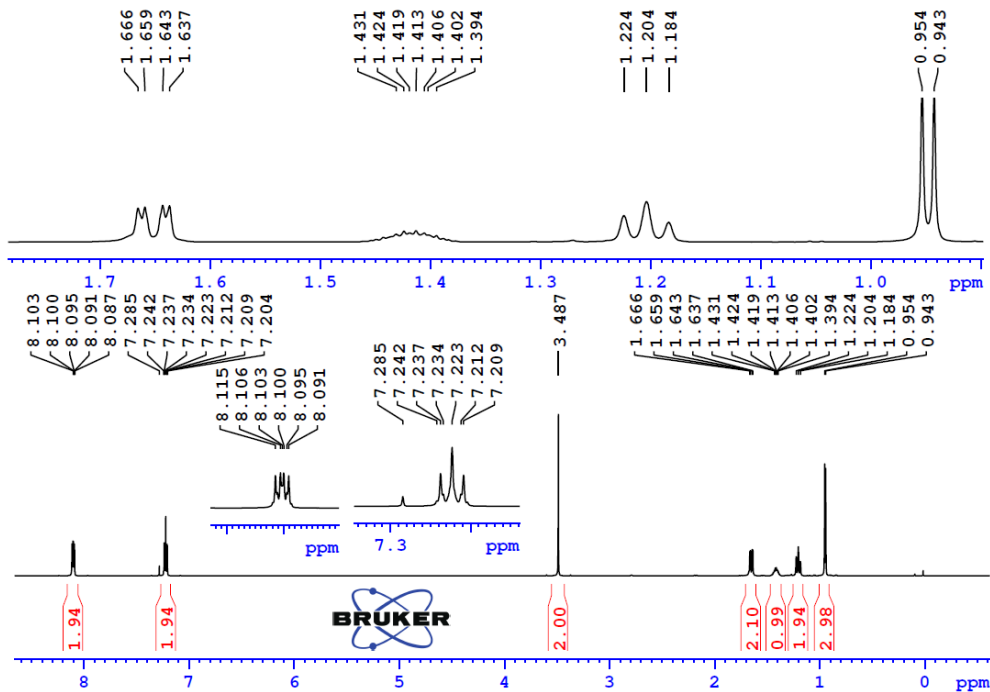

<sup>13</sup>C NMR

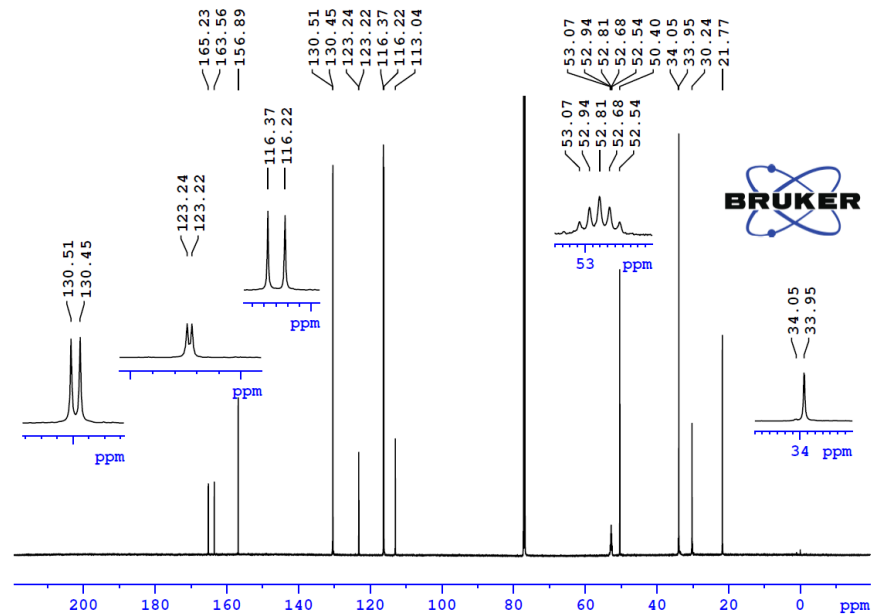

HPLC purity (2 wavelength)

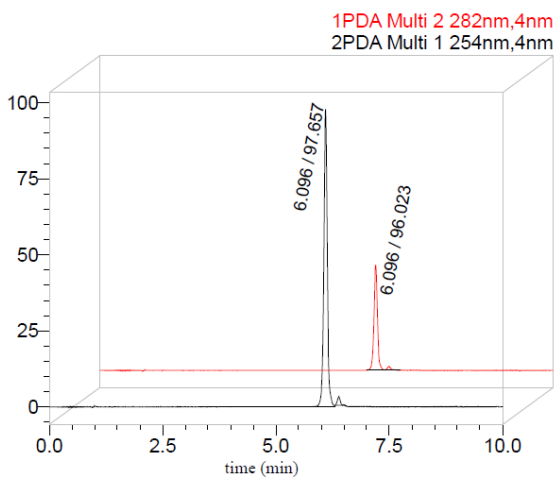

$\lambda_{max} = 260 \text{ nm}$

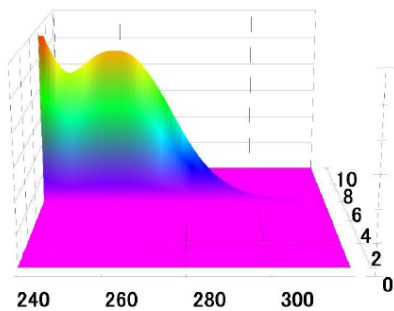

S19

296.1710

[M+H]<sup>+</sup>

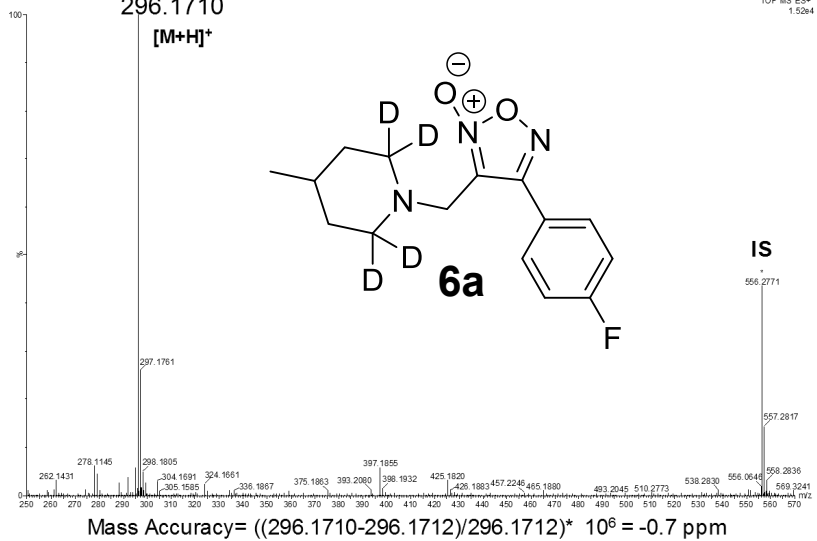

BRUKER

BRUKER

TOF MS ES+  
1.52e4

IS

# Analysis Report

## <sup>1</sup>H NMR

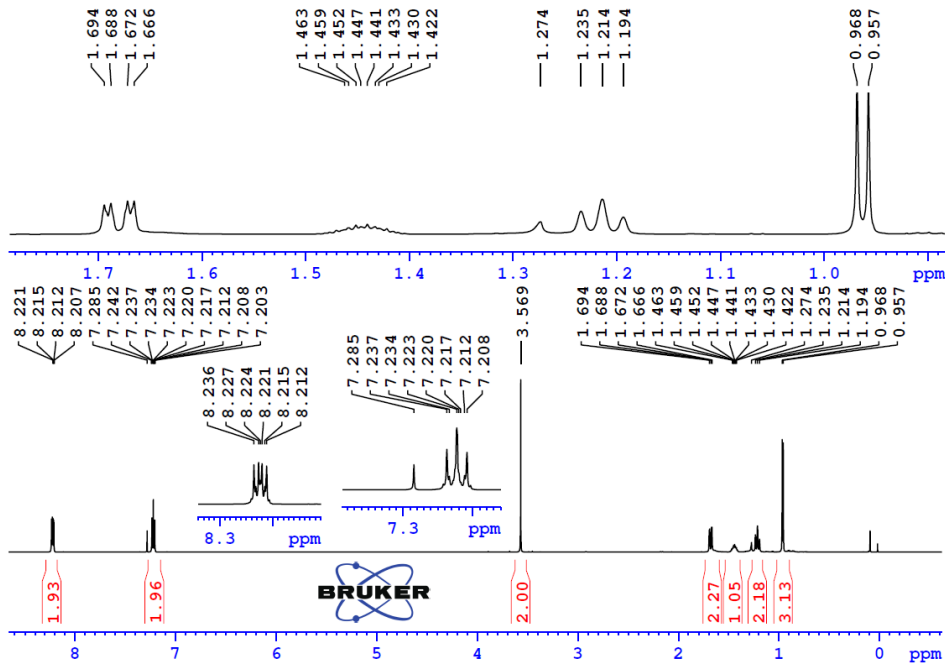

## <sup>13</sup>C NMR

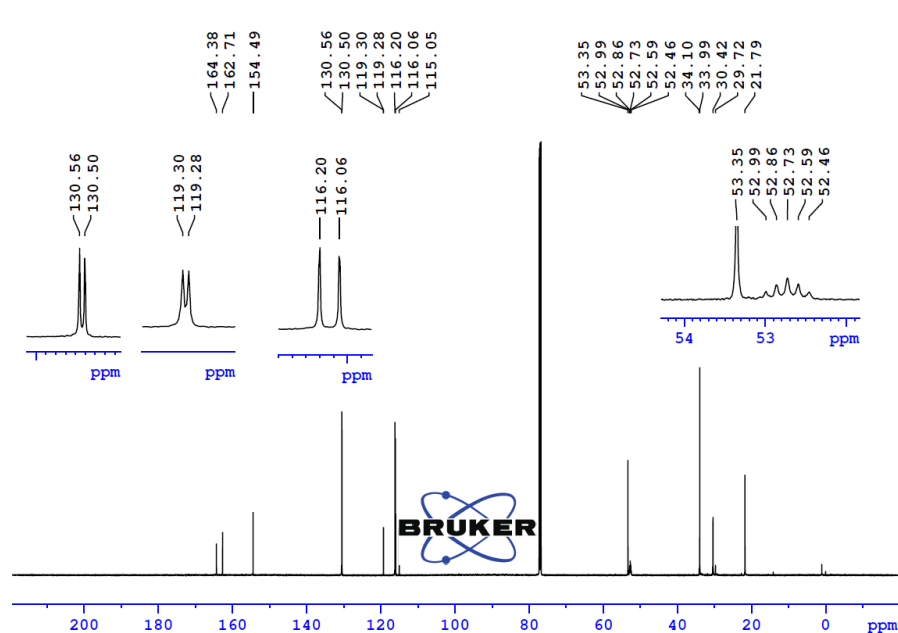

## HPLC purity (2 wavelength)

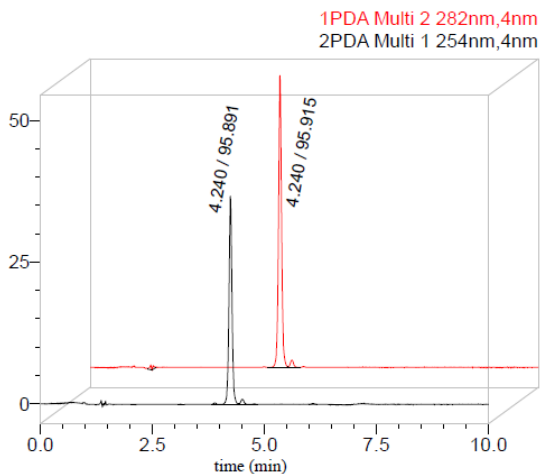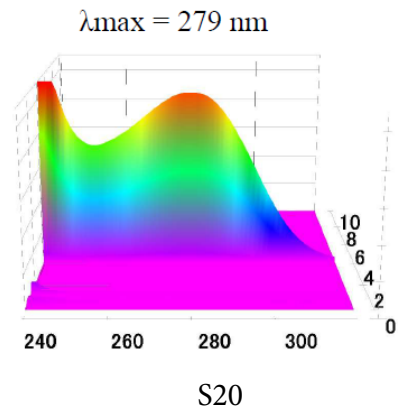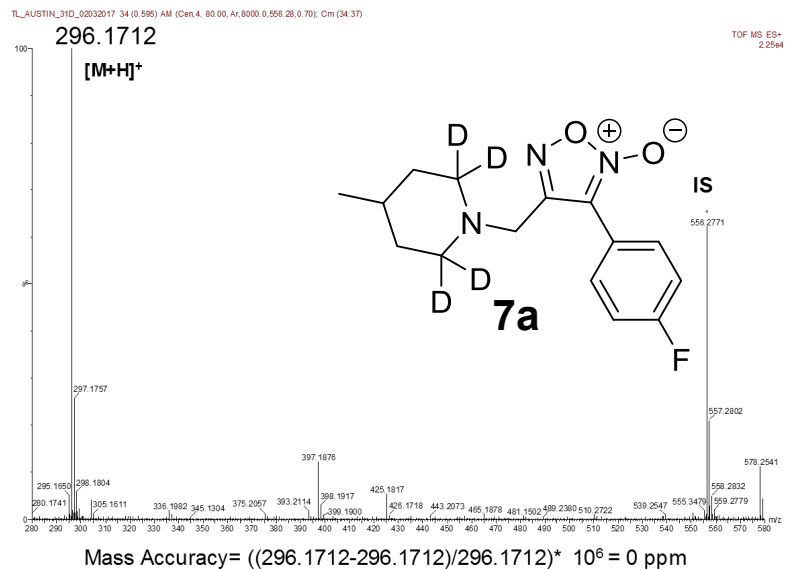

## Supplemental LC-MS/MS Data

# Furoxans (oxadiazole-4N-oxides) with Attenuated Reactivity are Neuroprotective, Cross the Blood Brain Barrier, and Improve Passive Avoidance Memory

*Austin Horton<sup>†</sup>, Kevin Nash<sup>‡</sup>, Ethel Tackie-Yarboi<sup>†</sup>, Alexander Kostrevski<sup>†</sup>, Adam Novak<sup>†</sup>,  
Aparna Raghavan<sup>†</sup>, Jatin Tulsulkar<sup>†</sup>, Qasim Alhadidi<sup>†</sup>, Nathan Wamer<sup>†</sup>, Bryn Langenderfer<sup>†</sup>,  
Kalee Royster<sup>†</sup>, Maxwell Ducharme<sup>†</sup>, Katelyn Hagood<sup>†</sup>, Megan Post<sup>†</sup>, Zahoor A. Shah<sup>†</sup>, Isaac T.  
Schiefer<sup>†\*</sup>*

<sup>†</sup>Department of Medicinal and Biological Chemistry, College of Pharmacy and Pharmaceutical Sciences, University of Toledo, Toledo, OH, 43614

<sup>‡</sup>Department of Pharmacology and Experimental Therapeutics, College of Pharmacy and Pharmaceutical Sciences, University of Toledo, Toledo, OH 43614

## List of Contents

- S3 Data compilation for all data from LC-MS/MS analysis of **5a** in brain and plasma
- S4 Raw data compilation for LC-MS/MS analysis of **5a** in brain, extraction 1
- S5 Raw data compilation for LC-MS/MS analysis of **5a** in brain, extraction 2
- S6 Raw data compilation for LC-MS/MS analysis of **5a** in plasma
- S7-59 MRM chromatograms reported in raw data compilations (S4-S6)

# Data compilation

| Treatment      | 5a (uM)<br>BRAIN EXTRACTION 1 | 5a (uM)<br>BRAIN EXTRACTION 2 | 5a (uM)<br>Average | 5a (uM)<br>PLASMA  | Brain:Plasma ratio | Cohort average |
|----------------|-------------------------------|-------------------------------|--------------------|--------------------|--------------------|----------------|
| 1h A po        | 5.021404692                   | 7.570475142                   | 6.295939917        | 1.152172646        | 6.570608291        | 1.902184       |
| 1h B po        | 0.438005541                   | 0.496247619                   | 0.46712658         | 1.504803625        | 0.329775667        |                |
| 1h C po        | 0.18573551                    | 0.191764773                   | 0.188750141        | 0.746087117        | 0.257027321        |                |
| 1h D po        | 0.304083271                   | 0.375337329                   | 0.3397103          | 0.83163151         | 0.451326489        |                |
| 2h A po        | 0.234814764                   | 0.176872844                   | 0.205843804        | 0.491709233        | 0.359710235        | 2.143243       |
| 2h B po        | 0.319784173                   | 0.343704818                   | 0.331744496        | 0.656694293        | 0.523386333        |                |
| 2h C po        | 3.496903256                   | 5.308982024                   | 4.40294264         | 0.784998351        | 6.763048632        |                |
| 2h D po        | 0.40976202                    | 0.460532135                   | 0.435147078        | 0.496891309        | 0.926826706        |                |
| 12h A po       | 0.203863481                   | 0.195914571                   | 0.199889026        | 0.479731977        | 0.408383389        | 0.428112       |
| 12h B po       | 0.190676356                   | 0.188929416                   | 0.189802886        | 0.50597177         | 0.373399124        |                |
| 12h C po       | 0.283623444                   | 0.262208379                   | 0.272915912        | 0.47450688         | 0.552591311        |                |
| 12h D po       | 0.238651466                   | 0.179023128                   | 0.208837297        | 0.473514035        | 0.378073541        |                |
| 1h A ip        | 0.929929189                   | 1.367733691                   | 1.14883144         | 3.959449899        | 0.345435282        | 0.740835       |
| <b>1h B ip</b> | <b>33.79972295</b>            | <b>66.75282608</b>            | <b>50.27627451</b> | <b>120.4377418</b> | <b>0.554251724</b> |                |
| 1h C ip        | 2.028460029                   | 2.77090799                    | 2.39968401         | 1.793674967        | 1.544821688        |                |
| 1h D ip        | 1.829281108                   | 2.470738824                   | 2.150009966        | 4.762129032        | 0.518830718        |                |
| 2h A ip        | 3.298339546                   | 5.901326053                   | 4.599832799        | 5.201636318        | 1.13451339         | 0.695345       |
| 2h B ip        | 0.746475489                   | 1.113685354                   | 0.930080421        | 1.956476171        | 0.569230216        |                |
| 2h C ip        | 0.619481016                   | 0.875068739                   | 0.747274878        | 2.429136944        | 0.360238537        |                |
| 2h D ip        | 0.62765278                    | 1.064356716                   | 0.846004748        | 1.483635842        | 0.717397549        |                |
| 12h A ip       | 0.456982172                   | 0.516527212                   | 0.486754692        | 0.567720034        | 0.909827345        | 0.665269       |
| 12h B ip       | 0.328336552                   | 0.309402532                   | 0.318869542        | 0.84678724         | 0.365384028        |                |
| 12h C ip       | 0.408506456                   | 0.63185246                    | 0.520179458        | 0.645084262        | 0.979488258        |                |
| 12h D ip       | 0.351659445                   | 0.486566094                   | 0.419112769        | 1.197328758        | 0.406376353        |                |

Removed from interpretation as outlier

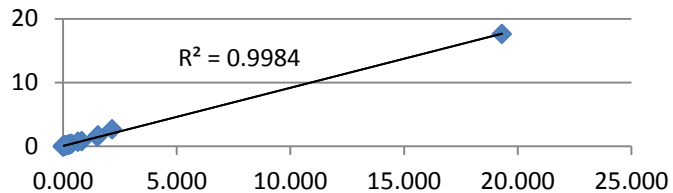

Correlation for brain extraction 1 versus brain extraction 2<sub>S3</sub>

Calculations based on ratio of AUC of **5a:7a** from raw data shown on subsequent pages.

# Forebrain Extraction 1

|          | 5a TIC<br>Extraction 1<br>Forebrain<br>Run 1 | 7a TIC<br>Extraction 2<br>Forebrain<br>Run 1 | 5a TIC<br>Extraction 2<br>Forebrain<br>Run 2 | 7a TIC<br>Extraction 2<br>Forebrain<br>Run 2 | 5a:7a<br>Forebrain<br>Run 1 | 5a:7a<br>Forebrain<br>Run 2 | 31b:41b<br>Average | Concentration<br>in 100 uL load<br>solvent | Forebrain<br>Weight | 5a (µM) in<br>Forebrain | Cohort Average Brain<br>(µM) |
|----------|----------------------------------------------|----------------------------------------------|----------------------------------------------|----------------------------------------------|-----------------------------|-----------------------------|--------------------|--------------------------------------------|---------------------|-------------------------|------------------------------|
| 1h A po  | 779347                                       | 4701470                                      | 1416954                                      | 4101943                                      | 0.166                       | 0.345434834                 | 0.256              | 0.308736491                                | 0.332               | 0.929929189             | 9.646848318                  |
| 1h B po  | 28833485                                     | 3617342                                      | 61522339                                     | 4626808                                      | 7.971                       | 13.29692933                 | 10.634             | 10.98490996                                | 0.325               | 33.79972295             |                              |
| 1h C po  | 3335096                                      | 6711663                                      | 2583986                                      | 4985591                                      | 0.497                       | 0.51829081                  | 0.508              | 0.567968808                                | 0.28                | 2.028460029             |                              |
| 1h D po  | 2906672                                      | 6743284                                      | 2172793                                      | 4857855                                      | 0.431                       | 0.447274157                 | 0.439              | 0.497564461                                | 0.272               | 1.829281108             |                              |
| 2h A po  | 6704560                                      | 6518573                                      | 5309932                                      | 4996548                                      | 1.029                       | 1.062720102                 | 1.046              | 1.121435446                                | 0.34                | 3.298339546             | 1.322987208                  |
| 2h B po  | 825194                                       | 4253708                                      | 862977                                       | 4956202                                      | 0.194                       | 0.174120627                 | 0.184              | 0.235139779                                | 0.315               | 0.746475489             |                              |
| 2h C po  | 637230                                       | 4658609                                      | 468954                                       | 3430703                                      | 0.137                       | 0.136693267                 | 0.137              | 0.186463786                                | 0.301               | 0.619481016             |                              |
| 2h D po  | 793817                                       | 5997856                                      | 640887                                       | 4749837                                      | 0.132                       | 0.134928209                 | 0.134              | 0.183274612                                | 0.292               | 0.62765278              |                              |
| 12h A po | 402876                                       | 5210222                                      | 326855                                       | 4240963                                      | 0.077                       | 0.077070939                 | 0.077              | 0.125213115                                | 0.274               | 0.456982172             | 0.386371156                  |
| 12h B po | 242646                                       | 5797943                                      | 183557                                       | 4427289                                      | 0.042                       | 0.041460361                 | 0.042              | 0.088650869                                | 0.27                | 0.328336552             |                              |
| 12h C po | 420880                                       | 5658467                                      | 337511                                       | 4282496                                      | 0.074                       | 0.078811749                 | 0.077              | 0.124594469                                | 0.305               | 0.408506456             |                              |
| 12h D po | 412869                                       | 6176968                                      | 337853                                       | 4797744                                      | 0.067                       | 0.070419139                 | 0.069              | 0.116399276                                | 0.331               | 0.351659445             |                              |
| 1h A ip  | 7272318                                      | 4782264                                      | 6063018                                      | 3878786                                      | 1.521                       | 1.563122585                 | 1.542              | 1.631956525                                | 0.325               | 5.021404692             | 1.487307254                  |
| 1h B ip  | 341196                                       | 4637403                                      | 286498                                       | 3577714                                      | 0.074                       | 0.080078508                 | 0.077              | 0.124831579                                | 0.285               | 0.438005541             |                              |
| 1h C ip  | 80231                                        | 6564810                                      | 66415                                        | 5170861                                      | 0.012                       | 0.012844089                 | 0.013              | 0.058692421                                | 0.316               | 0.18573551              |                              |
| 1h D ip  | 212498                                       | 5246856                                      | 178873                                       | 4040679                                      | 0.041                       | 0.044268055                 | 0.042              | 0.089400482                                | 0.294               | 0.304083271             |                              |
| 2h A ip  | 103651                                       | 4987592                                      | 86691                                        | 3841547                                      | 0.021                       | 0.02256669                  | 0.022              | 0.068096281                                | 0.29                | 0.234814764             | 1.115316053                  |
| 2h B ip  | 256979                                       | 4994341                                      | 212791                                       | 4025713                                      | 0.051                       | 0.052857966                 | 0.052              | 0.099452878                                | 0.311               | 0.319784173             |                              |
| 2h C ip  | 3349998                                      | 3291223                                      | 2701203                                      | 2464891                                      | 1.018                       | 1.095871176                 | 1.057              | 1.132996655                                | 0.324               | 3.496903256             |                              |
| 2h D ip  | 355031                                       | 4948924                                      | 271467                                       | 3737264                                      | 0.072                       | 0.072637898                 | 0.072              | 0.120060272                                | 0.293               | 0.40976202              |                              |
| 12h A ip | 69549                                        | 4498797                                      | 52679                                        | 3215395                                      | 0.015                       | 0.016383368                 | 0.016              | 0.062178362                                | 0.305               | 0.203863481             | 0.229203687                  |
| 12h B ip | 79150                                        | 5221270                                      | 60415                                        | 4188312                                      | 0.015                       | 0.014424666                 | 0.015              | 0.061016434                                | 0.32                | 0.190676356             |                              |
| 12h C ip | 143336                                       | 5438582                                      | 102936                                       | 3911626                                      | 0.026                       | 0.026315399                 | 0.026              | 0.072891225                                | 0.257               | 0.283623444             |                              |
| 12h D ip | 114567                                       | 4187649                                      | 138709                                       | 4812100                                      | 0.027                       | 0.028825045                 | 0.028              | 0.074697909                                | 0.313               | 0.238651466             |                              |

Assuming tissue density = 1



# Forebrain Extraction 2

|          | 5a TIC<br>Extraction 1<br>Forebrain<br>Run 1 | 7a TIC<br>Extraction 2<br>Forebrain<br>Run 1 | 5a TIC<br>Extraction 2<br>Forebrain<br>Run 2 | 7a TIC<br>Extraction 2<br>Forebrain<br>Run 2 | 5a:7a<br>Forebrain<br>Run 1 | 5a:7a<br>Forebrain<br>Run 2 | 31b:41b<br>Average | Concentration in<br>100 uL load<br>solvent | Forebrain<br>Weight | 5a (µM) in Forebrain | Cohort Average<br>Brain (µM) |
|----------|----------------------------------------------|----------------------------------------------|----------------------------------------------|----------------------------------------------|-----------------------------|-----------------------------|--------------------|--------------------------------------------|---------------------|----------------------|------------------------------|
| 1h A po  | 5977020                                      | 2759730                                      | 6141928                                      | 2333818                                      | 2.166                       | 2.631708214                 | 2.399              | 2.513397747                                | 0.332               | 7.570475142          | 2.158456216                  |
| 1h B po  | 292507                                       | 2668536                                      | 272899                                       | 2375017                                      | 0.110                       | 0.11490402                  | 0.112              | 0.161280476                                | 0.325               | 0.496247619          |                              |
| 1h C po  | 25436                                        | 2933832                                      | 17519                                        | 2623429                                      | 0.009                       | 0.006677901                 | 0.008              | 0.053694136                                | 0.28                | 0.191764773          |                              |
| 1h D po  | 152439                                       | 2730977                                      | 148097                                       | 2761766                                      | 0.056                       | 0.053624022                 | 0.055              | 0.102091754                                | 0.272               | 0.375337329          |                              |
| 2h A po  | 36528                                        | 2712517                                      | 35960                                        | 2495991                                      | 0.013                       | 0.014407103                 | 0.014              | 0.060136767                                | 0.34                | 0.176872844          | 1.572522955                  |
| 2h B po  | 159645                                       | 2683537                                      | 156009                                       | 2517982                                      | 0.059                       | 0.061957949                 | 0.061              | 0.108267018                                | 0.315               | 0.343704818          |                              |
| 2h C po  | 4185007                                      | 2755530                                      | 3748330                                      | 2500504                                      | 1.519                       | 1.499029796                 | 1.509              | 1.598003589                                | 0.301               | 5.308982024          |                              |
| 2h D po  | 199599                                       | 2474028                                      | 224150                                       | 2443716                                      | 0.081                       | 0.091725061                 | 0.086              | 0.134475383                                | 0.292               | 0.460532135          |                              |
| 12h A po | 12881                                        | 1744456                                      | 19722                                        | 2484663                                      | 0.007                       | 0.007937495                 | 0.008              | 0.053680592                                | 0.274               | 0.195914571          | 0.206518873                  |
| 12h B po | 13743                                        | 2713069                                      | 12945                                        | 2555452                                      | 0.005                       | 0.00506564                  | 0.005              | 0.051010942                                | 0.27                | 0.188929416          |                              |
| 12h C po | 77824                                        | 2426256                                      | 77919                                        | 2267426                                      | 0.032                       | 0.034364517                 | 0.033              | 0.079973556                                | 0.305               | 0.262208379          |                              |
| 12h D po | 28540                                        | 2298942                                      | 32820                                        | 2387249                                      | 0.012                       | 0.013748042                 | 0.013              | 0.059256655                                | 0.331               | 0.179023128          |                              |
| 1h A ip  | 945282                                       | 2496297                                      | 963363                                       | 2429633                                      | 0.379                       | 0.396505563                 | 0.388              | 0.444513449                                | 0.325               | 1.367733691          | 2.203126835                  |
| 1h B ip  | 44142396                                     | 2286375                                      | 44884226                                     | 2551428                                      | 19.307                      | 17.59180584                 | 18.449             | 19.02455543                                | 0.285               | 66.75282608          |                              |
| 1h C ip  | 1927865                                      | 2325073                                      | 1817727                                      | 2318090                                      | 0.829                       | 0.784148588                 | 0.807              | 0.875606925                                | 0.316               | 2.77090799           |                              |
| 1h D ip  | 1255381                                      | 1904408                                      | 1648445                                      | 2482521                                      | 0.659                       | 0.664020566                 | 0.662              | 0.726397214                                | 0.294               | 2.470738824          |                              |
| 2h A ip  | 3769513                                      | 2443467                                      | 4040845                                      | 2383218                                      | 1.543                       | 1.695541491                 | 1.619              | 1.711384555                                | 0.29                | 5.901326053          | 2.238609215                  |
| 2h B ip  | 572336                                       | 2029841                                      | 625088                                       | 2067222                                      | 0.282                       | 0.302380683                 | 0.292              | 0.346356145                                | 0.311               | 1.113685354          |                              |
| 2h C ip  | 511351                                       | 2198383                                      | 533855                                       | 2325388                                      | 0.233                       | 0.229576742                 | 0.231              | 0.283522272                                | 0.324               | 0.875068739          |                              |
| 2h D ip  | 603096                                       | 2213597                                      | 370398                                       | 1512960                                      | 0.272                       | 0.244816783                 | 0.259              | 0.311856518                                | 0.293               | 1.064356716          |                              |
| 12h A ip | 253486                                       | 2251485                                      | 254211                                       | 2428911                                      | 0.113                       | 0.104660484                 | 0.109              | 0.1575408                                  | 0.305               | 0.516527212          | 0.486087075                  |
| 12h B ip | 94468                                        | 1928442                                      | 129539                                       | 2378523                                      | 0.049                       | 0.05446195                  | 0.052              | 0.09900881                                 | 0.32                | 0.309402532          |                              |
| 12h C ip | 253352                                       | 2215015                                      | 262466                                       | 2337447                                      | 0.114                       | 0.112287466                 | 0.113              | 0.162386082                                | 0.257               | 0.63185246           |                              |
| 12h D ip | 233487                                       | 2196476                                      | 248146                                       | 2463052                                      | 0.106                       | 0.100747365                 | 0.104              | 0.152295187                                | 0.313               | 0.486566094          |                              |

Assuming tissue density = 1

# Plasma Extraction

|          | 5a TIC<br>Extraction<br>Plasma<br>Run 1 | 7a TIC<br>Extraction<br>Plasma<br>Run 1 | 5a TIC<br>Extraction<br>Plasma<br>Run 2 | 7a TIC<br>Extraction<br>Plasma<br>Run 2 | 5a:7a<br>Plasma<br>Run 1 | 5a:7a<br>Plasma<br>Run 2 | 5a:7a<br>Average | Concentration<br>in 100 uL load<br>solvent | Plasma volume<br>(ml) | 5a (µM) in Plasma | Cohort Average<br>Plasma (µM) |
|----------|-----------------------------------------|-----------------------------------------|-----------------------------------------|-----------------------------------------|--------------------------|--------------------------|------------------|--------------------------------------------|-----------------------|-------------------|-------------------------------|
| 1h A po  | 47339                                   | 1602760                                 | 52848                                   | 1718260                                 | 0.030                    | 0.030756696              | 0.030            | 0.07681151                                 | 0.1                   | 1.152172646       | 1.058673725                   |
| 1h B po  | 54222                                   | 996223                                  | 59588                                   | 1155461                                 | 0.054                    | 0.051570758              | 0.053            | 0.100320242                                | 0.1                   | 1.504803625       |                               |
| 1h C po  | 5309                                    | 1415864                                 | 6167                                    | 1577710                                 | 0.004                    | 0.00390883               | 0.004            | 0.049739141                                | 0.1                   | 0.746087117       |                               |
| 1h D po  | 93448                                   | 2514127                                 | 105524                                  | 2974826                                 | 0.037                    | 0.035472327              | 0.036            | 0.083163151                                | 0.1                   | 0.83163151        |                               |
| 2h A po  | 7829                                    | 1860480                                 | 5257                                    | 2241122                                 | 0.004                    | 0.0023457                | 0.003            | 0.049170923                                | 0.1                   | 0.491709233       | 0.607573297                   |
| 2h B po  | 39748                                   | 2039735                                 | 47444                                   | 2478357                                 | 0.019                    | 0.019143328              | 0.019            | 0.065669429                                | 0.1                   | 0.656694293       |                               |
| 2h C po  | 89652                                   | 2700075                                 | 101756                                  | 3350373                                 | 0.033                    | 0.030371544              | 0.032            | 0.078499835                                | 0.1                   | 0.784998351       |                               |
| 2h D po  | 10090                                   | 2366111                                 | 9453                                    | 2867263                                 | 0.004                    | 0.003296872              | 0.004            | 0.049689131                                | 0.1                   | 0.496891309       |                               |
| 12h A po | 5158                                    | 2055674                                 | 5970                                    | 3479059                                 | 0.003                    | 0.001715981              | 0.002            | 0.047973198                                | 0.1                   | 0.479731977       | 0.483431165                   |
| 12h B po | 11477                                   | 2763038                                 | 17700                                   | 3421667                                 | 0.004                    | 0.005172917              | 0.005            | 0.050597177                                | 0.1                   | 0.50597177        |                               |
| 12h C po | 4403                                    | 2511109                                 | 4686                                    | 3218713                                 | 0.002                    | 0.001455861              | 0.002            | 0.047450688                                | 0.1                   | 0.47450688        |                               |
| 12h D po | 3690                                    | 1966545                                 | 3079                                    | 2701224                                 | 0.002                    | 0.001139854              | 0.002            | 0.047351404                                | 0.1                   | 0.473514035       |                               |
| 1h A ip  | 911119                                  | 2647505                                 | 1159548                                 | 3444783                                 | 0.344                    | 0.336609882              | 0.340            | 0.39594499                                 | 0.1                   | 3.959449899       | 3.505084632                   |
| 1h B ip  | 31977557                                | 2689738                                 | 41393319                                | 3619008                                 | 11.889                   | 11.43775283              | 11.663           | 12.04377418                                | 0.1                   | 120.4377418       |                               |
| 1h C ip  | 356622                                  | 2638480                                 | 433347                                  | 3480134                                 | 0.135                    | 0.124520205              | 0.130            | 0.179367497                                | 0.1                   | 1.793674967       |                               |
| 1h D ip  | 1244440                                 | 2847130                                 | 1407472                                 | 3521113                                 | 0.437                    | 0.39972361               | 0.418            | 0.476212903                                | 0.1                   | 4.762129032       |                               |
| 2h A ip  | 558145                                  | 1171861                                 | 934405                                  | 2095224                                 | 0.476                    | 0.445969023              | 0.461            | 0.520163632                                | 0.1                   | 5.201636318       | 2.767721319                   |
| 2h B ip  | 449711                                  | 2997634                                 | 533305                                  | 3773955                                 | 0.150                    | 0.141311966              | 0.146            | 0.195647617                                | 0.1                   | 1.956476171       |                               |
| 2h C ip  | 456163                                  | 2221701                                 | 584815                                  | 3287191                                 | 0.205                    | 0.177907216              | 0.192            | 0.242913694                                | 0.1                   | 2.429136944       |                               |
| 2h D ip  | 290795                                  | 2782072                                 | 353790                                  | 3728829                                 | 0.105                    | 0.094879653              | 0.100            | 0.148363584                                | 0.1                   | 1.483635842       |                               |
| 12h A ip | 37150                                   | 2925522                                 | 30010                                   | 3476117                                 | 0.013                    | 0.008633196              | 0.011            | 0.056772003                                | 0.1                   | 0.567720034       | 0.814230074                   |
| 12h B ip | 105672                                  | 2701833                                 | 130864                                  | 3587591                                 | 0.039                    | 0.036476845              | 0.038            | 0.084678724                                | 0.1                   | 0.84678724        |                               |
| 12h C ip | 40048                                   | 2133356                                 | 52906                                   | 3005912                                 | 0.019                    | 0.017600648              | 0.018            | 0.064508426                                | 0.1                   | 0.645084262       |                               |
| 12h D ip | 240618                                  | 3214133                                 | 304325                                  | 4418325                                 | 0.075                    | 0.068877912              | 0.072            | 0.119732876                                | 0.1                   | 1.197328758       |                               |

Date Acquired : 3/30/2016 5:22:20 PM  
 Sample ID : 1h ipA Brain  
 Injection Volume : 10  
 Data File : 1.lcd  
 Method File : V1.lcm

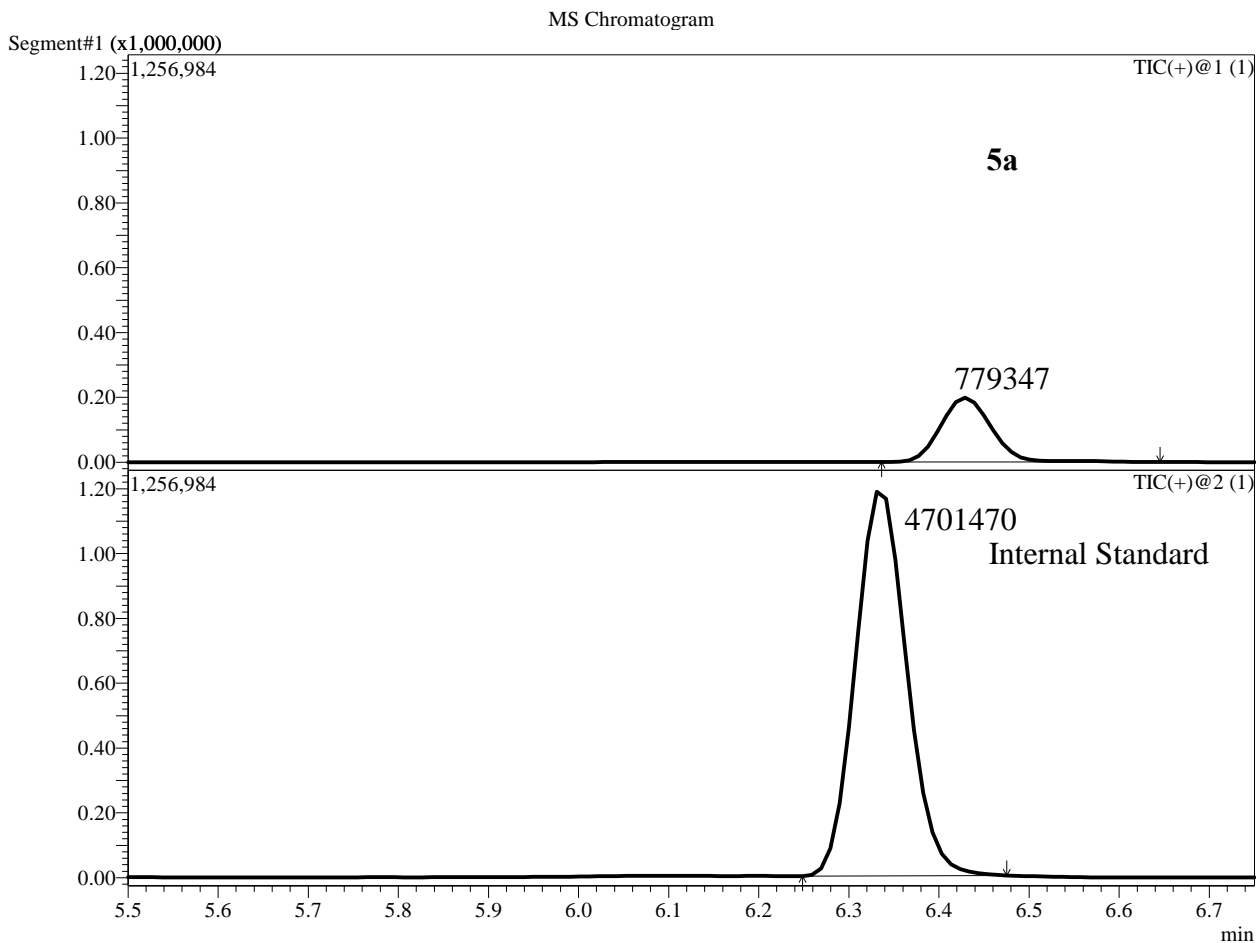

MASS Peak Table TIC

| Peak# | Ret. Time | m/z | Area    | Compound Name | Event# |
|-------|-----------|-----|---------|---------------|--------|
| 1     | 6.429     | TIC | 779347  |               | 1-1    |
| 2     | 6.335     | TIC | 4701470 |               | 1-2    |

Date Acquired : 3/31/2016 9:31:19 AM  
 Sample ID : 1h ipA Plasma  
 Injection Volume : 25.lcd  
 Data File : V1.lcm  
 Method File :

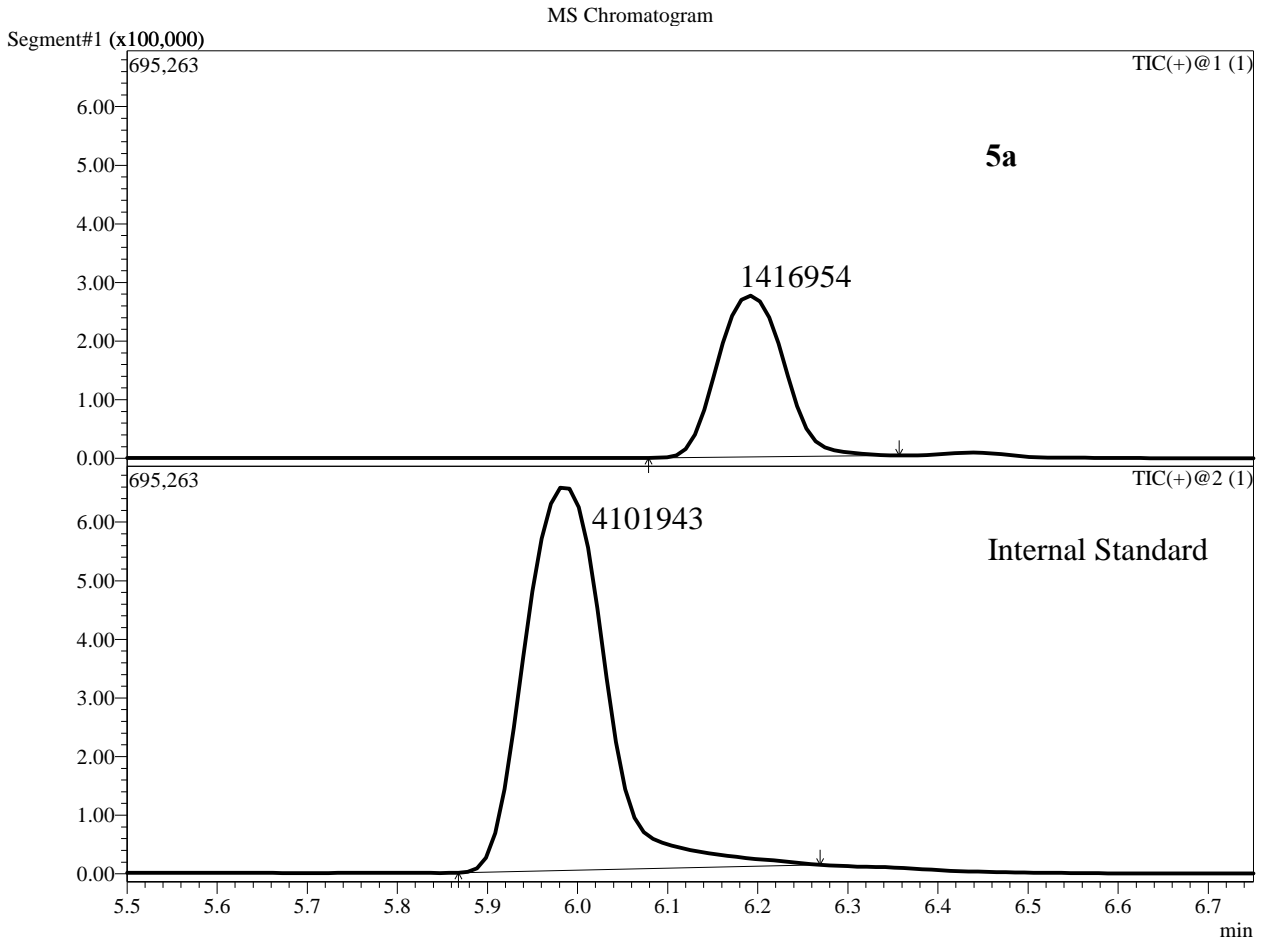

MASS Peak Table TIC

| Peak# | Ret. Time | m/z | Area    | Compound Name | Event# |
|-------|-----------|-----|---------|---------------|--------|
| 1     | 6.191     | TIC | 1416954 |               | 1-1    |
| 2     | 5.986     | TIC | 4101943 |               | 1-2    |

Sample Information

Date Acquired : 3/30/2016 5:32:50 PM  
 Sample ID : 1h ipB Brain  
 Injection Volume : 10  
 Data File : 2.lcd  
 Method File : V1.lcm

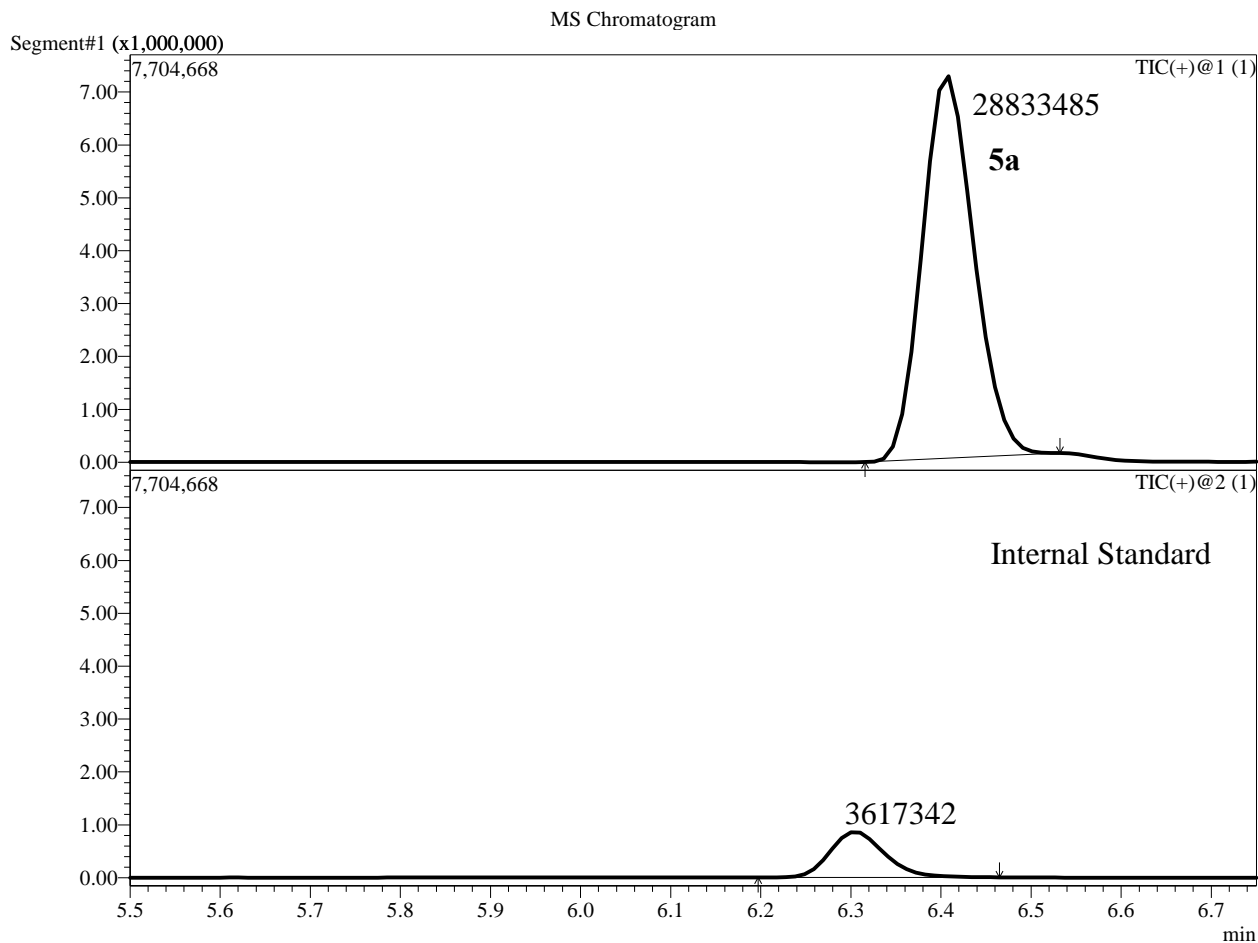

MASS Peak Table TIC

| Peak# | Ret. Time | m/z | Area     | Compound Name | Event# |
|-------|-----------|-----|----------|---------------|--------|
| 1     | 6.406     | TIC | 28833485 |               | 1-1    |
| 2     | 6.305     | TIC | 3617342  |               | 1-2    |

Date Acquired : 3/31/2016 9:41:51 AM  
 Sample ID : 1h ipB Plasma  
 Injection Volume : 10  
 Data File : 26.lcd  
 Method File : V1.lcm

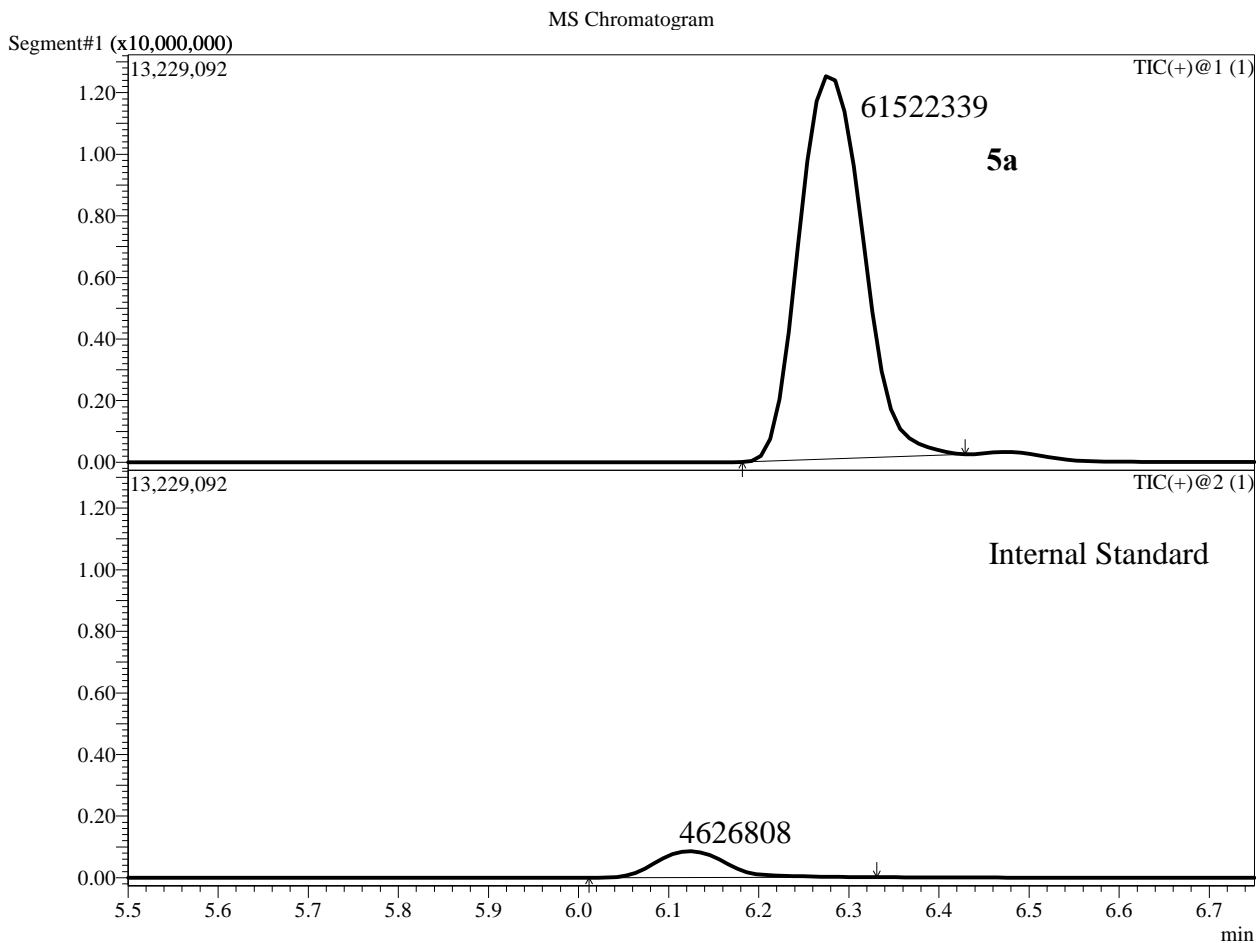

MASS Peak Table TIC

| Peak# | Ret. Time | m/z | Area     | Compound Name | Event# |
|-------|-----------|-----|----------|---------------|--------|
| 1     | 6.278     | TIC | 61522339 |               | 1-1    |
| 2     | 6.124     | TIC | 4626808  |               | 1-2    |

Date Acquired : 3/30/2016 5:43:20 PM  
 Sample ID : 1h ipC Brain  
 Injection Volume : 10  
 Data File : 3.lcd  
 Method File : V1.lcm

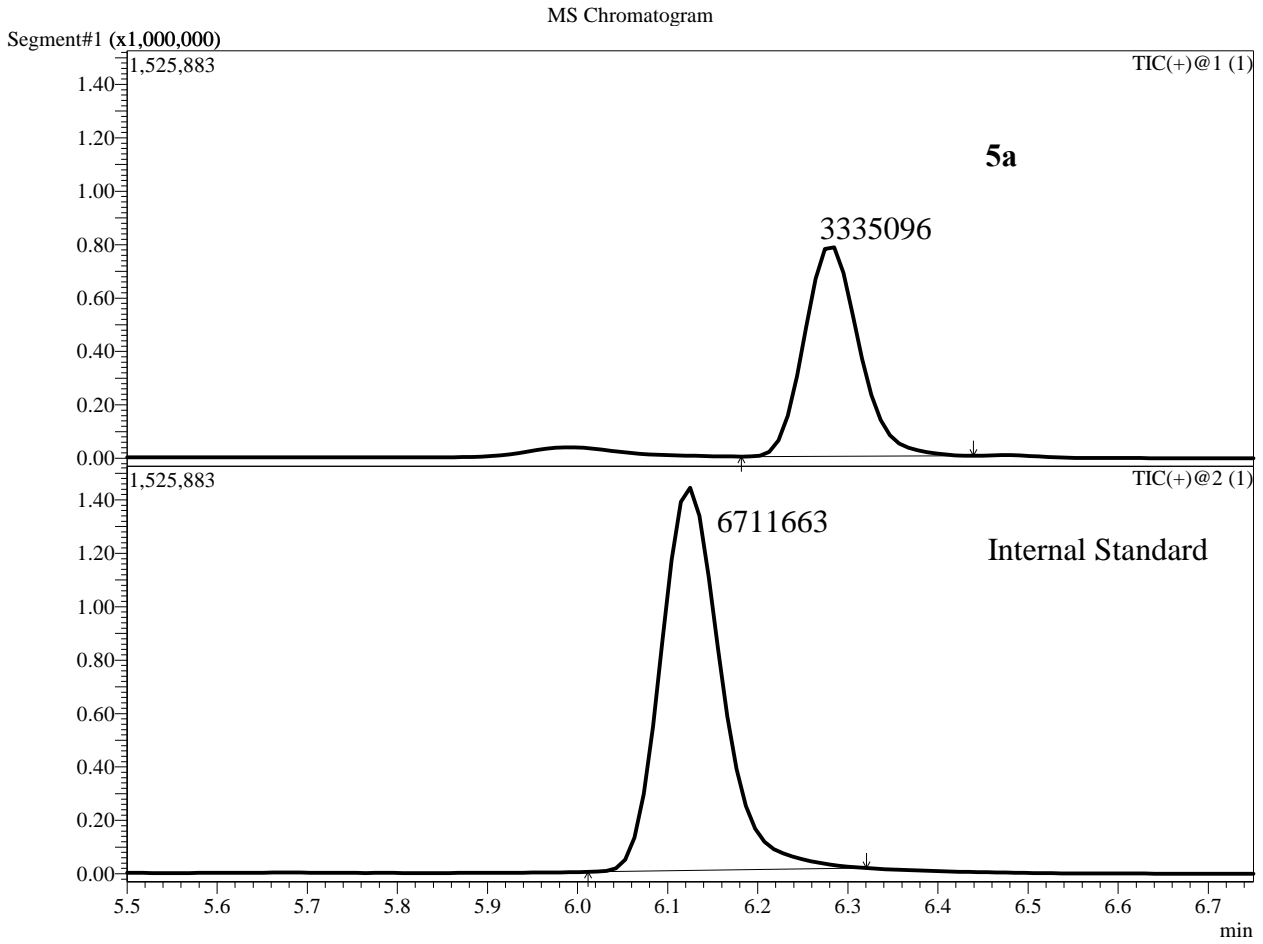

MASS Peak Table TIC

| Peak# | Ret. Time | m/z | Area    | Compound Name | Event# |
|-------|-----------|-----|---------|---------------|--------|
| 1     | 6.280     | TIC | 3335096 |               | 1-1    |
| 2     | 6.123     | TIC | 6711663 |               | 1-2    |

Date Acquired : 3/31/2016 9:52:21 AM  
 Sample ID : 1h ipC Plasma  
 Injection Volume : 10  
 Data File : 27.lcd  
 Method File : V1.lcm

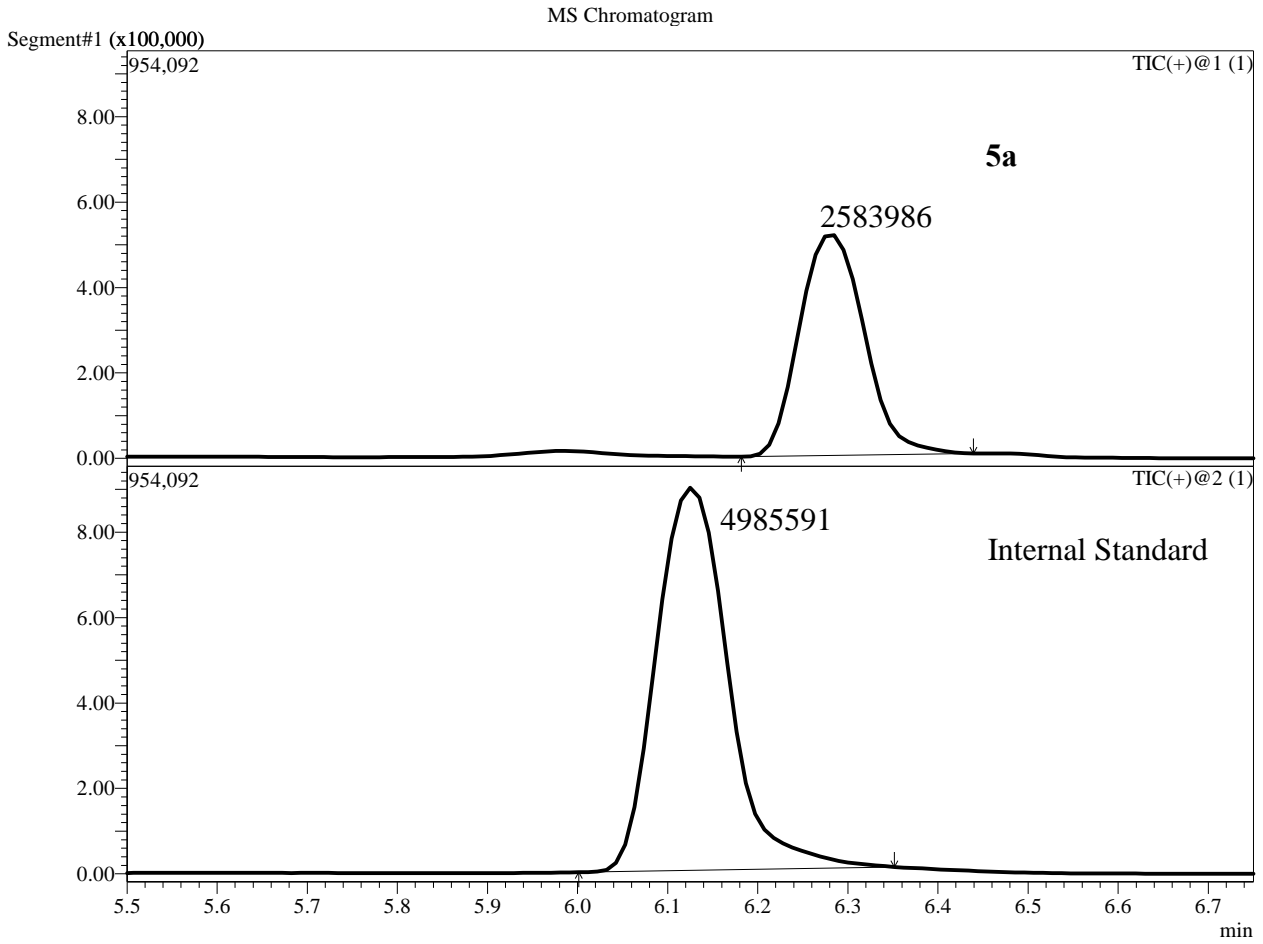

MASS Peak Table TIC

| Peak# | Ret. Time | m/z | Area    | Compound Name | Event# |
|-------|-----------|-----|---------|---------------|--------|
| 1     | 6.280     | TIC | 2583986 |               | 1-1    |
| 2     | 6.126     | TIC | 4985591 |               | 1-2    |



Date Acquired : 3/30/2016 5:53:50 PM  
 Sample ID : 1h ipD Brain  
 Injection Volume : 10  
 Data File : 4.lcd  
 Method File : V1.lcm

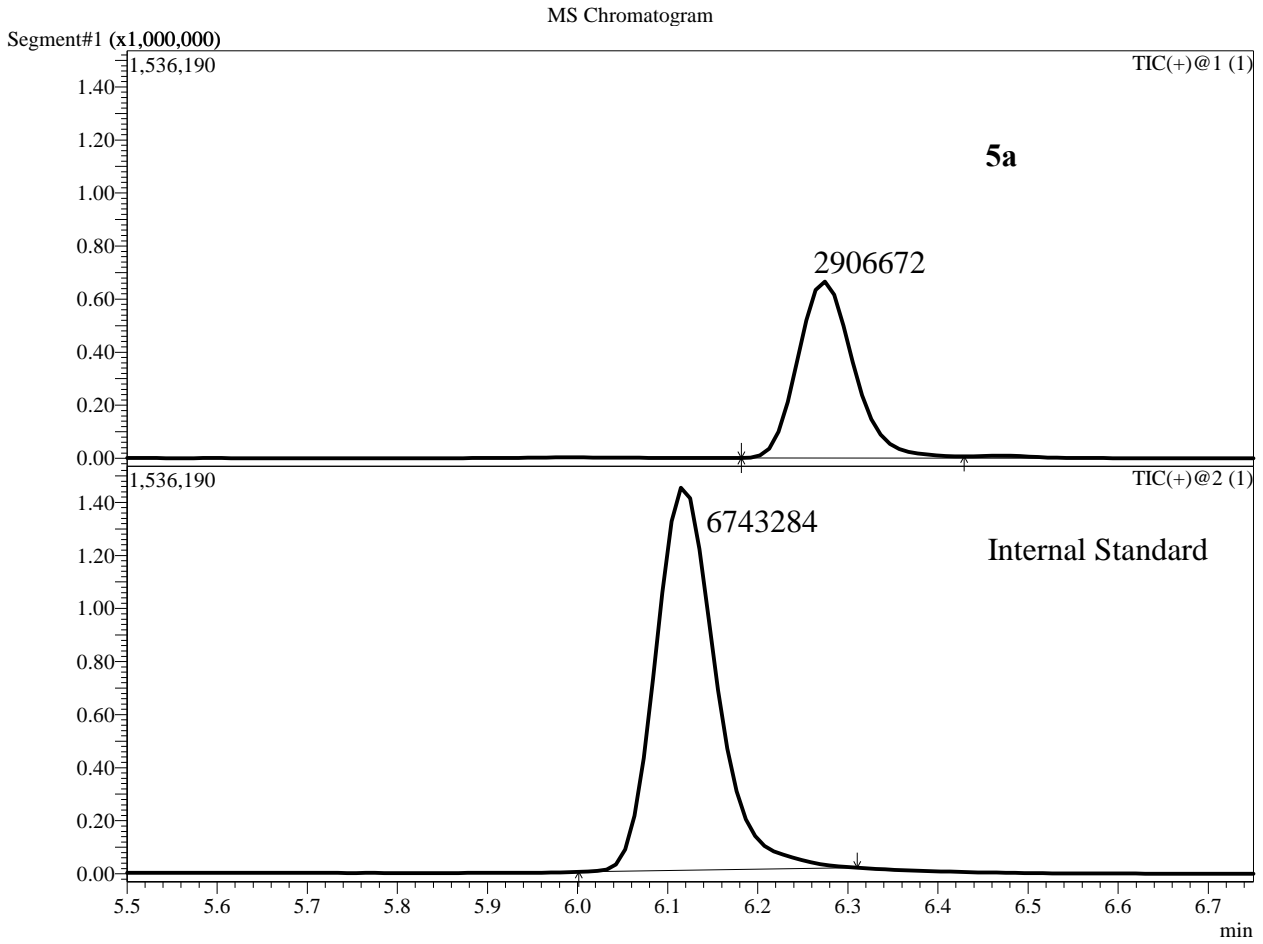

MASS Peak Table TIC

| Peak# | Ret. Time | m/z | Area    | Compound Name | Event# |
|-------|-----------|-----|---------|---------------|--------|
| 1     | 6.273     | TIC | 2906672 |               | 1-1    |
| 2     | 6.118     | TIC | 6743284 |               | 1-2    |

Date Acquired : 3/31/2016 10:02:51 AM  
 Sample ID : 1h ipD Plasma  
 Injection Volume : 10  
 Data File : 28.lcd  
 Method File : V1.lcm

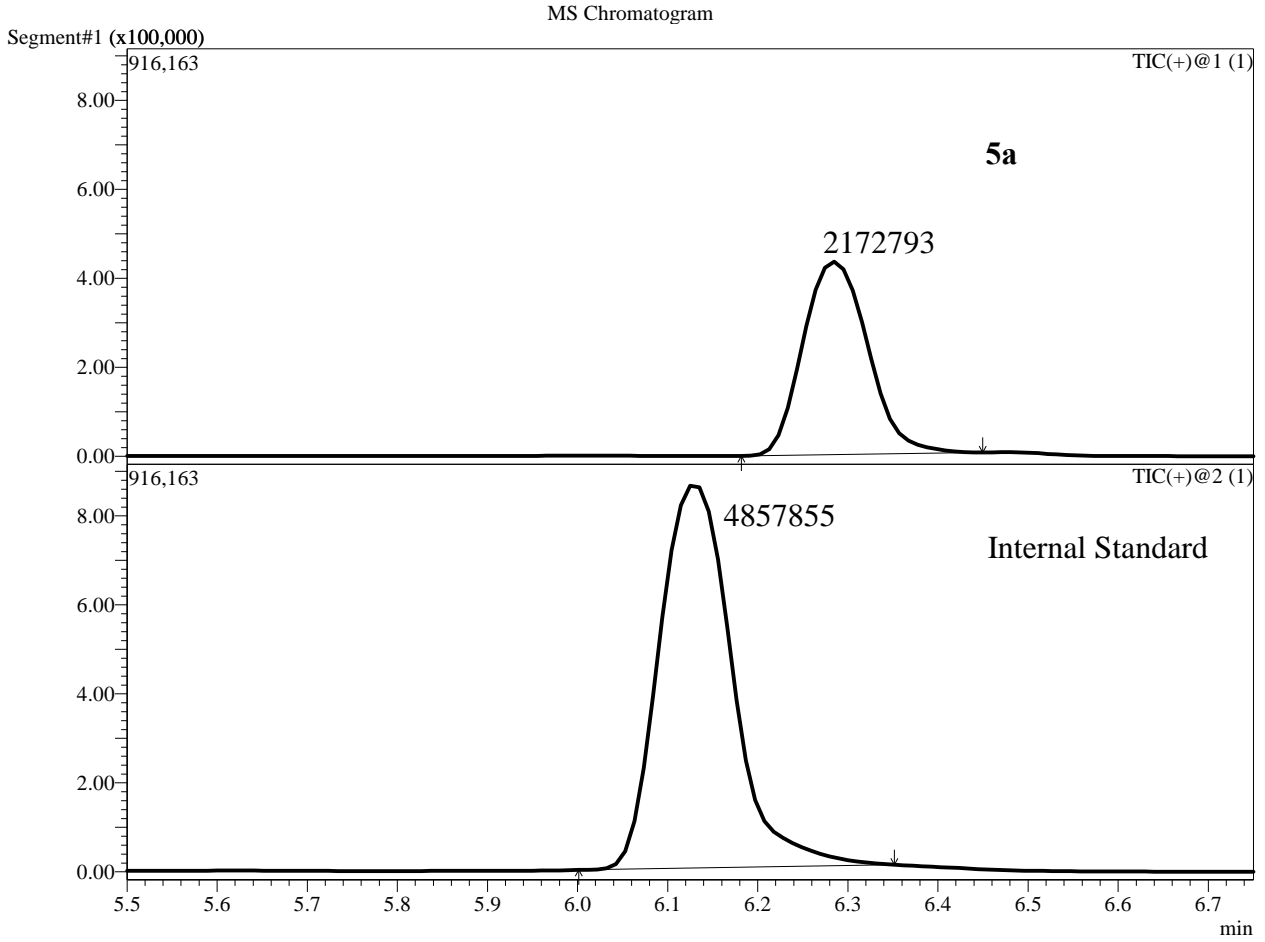

MASS Peak Table TIC

| Peak# | Ret. Time | m/z | Area    | Compound Name | Event# |
|-------|-----------|-----|---------|---------------|--------|
| 1     | 6.284     | TIC | 2172793 |               | 1-1    |
| 2     | 6.129     | TIC | 4857855 |               | 1-2    |

Date Acquired : 3/30/2016 6:04:20 PM  
 Sample ID : 2h ipA Brain: 10  
 Injection Volume : 5.lcd  
 Data File : V1.lcm  
 Method File :

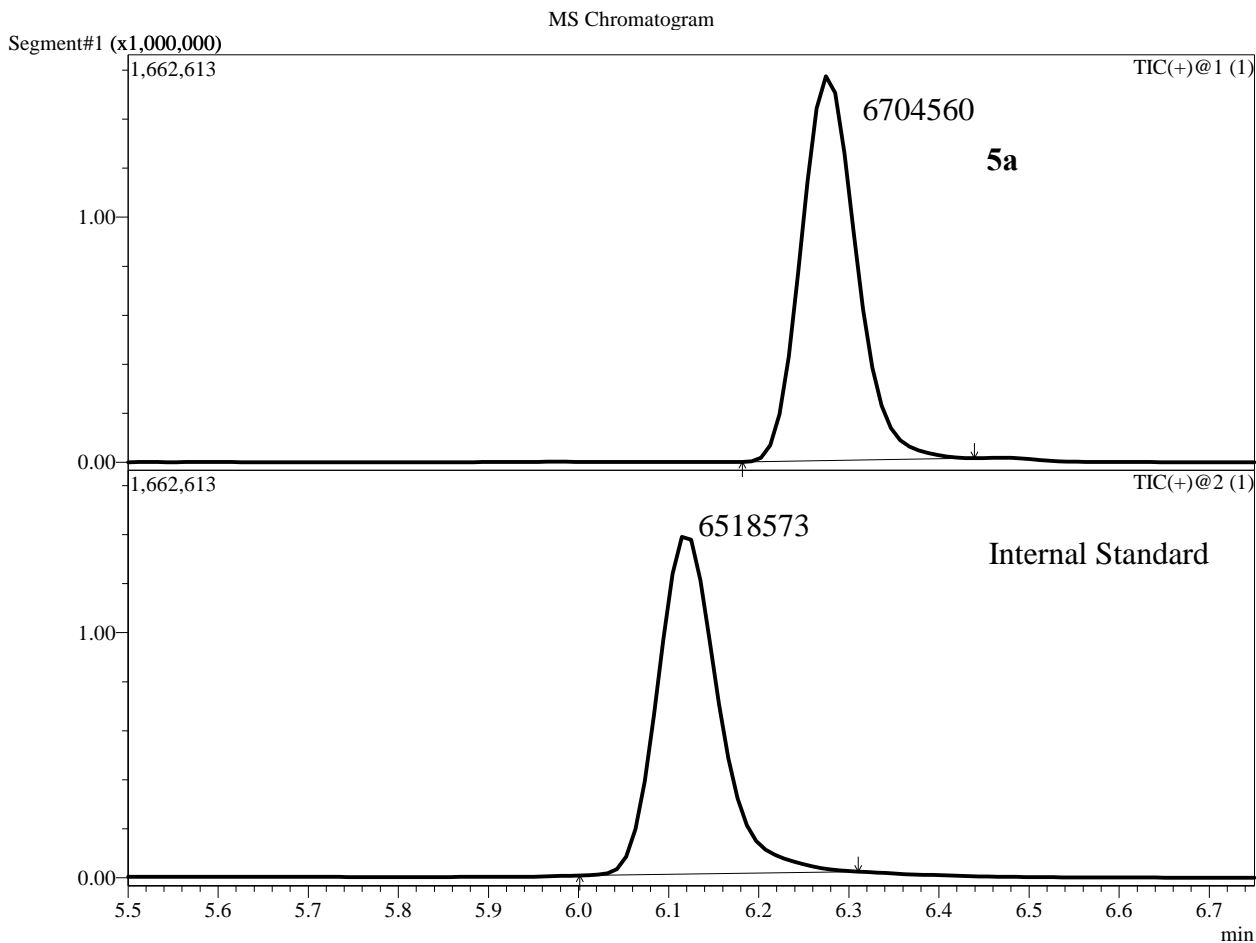

MASS Peak Table TIC

| Peak# | Ret. Time | m/z | Area    | Compound Name | Event# |
|-------|-----------|-----|---------|---------------|--------|
| 1     | 6.276     | TIC | 6704560 |               | 1-1    |
| 2     | 6.119     | TIC | 6518573 |               | 1-2    |

Date Acquired : 3/31/2016 10:13:20 AM :  
 Sample ID : 2h ipA Plasma  
 Injection Volume : 10  
 Data File : 29.lcd  
 Method File : V1.lcm

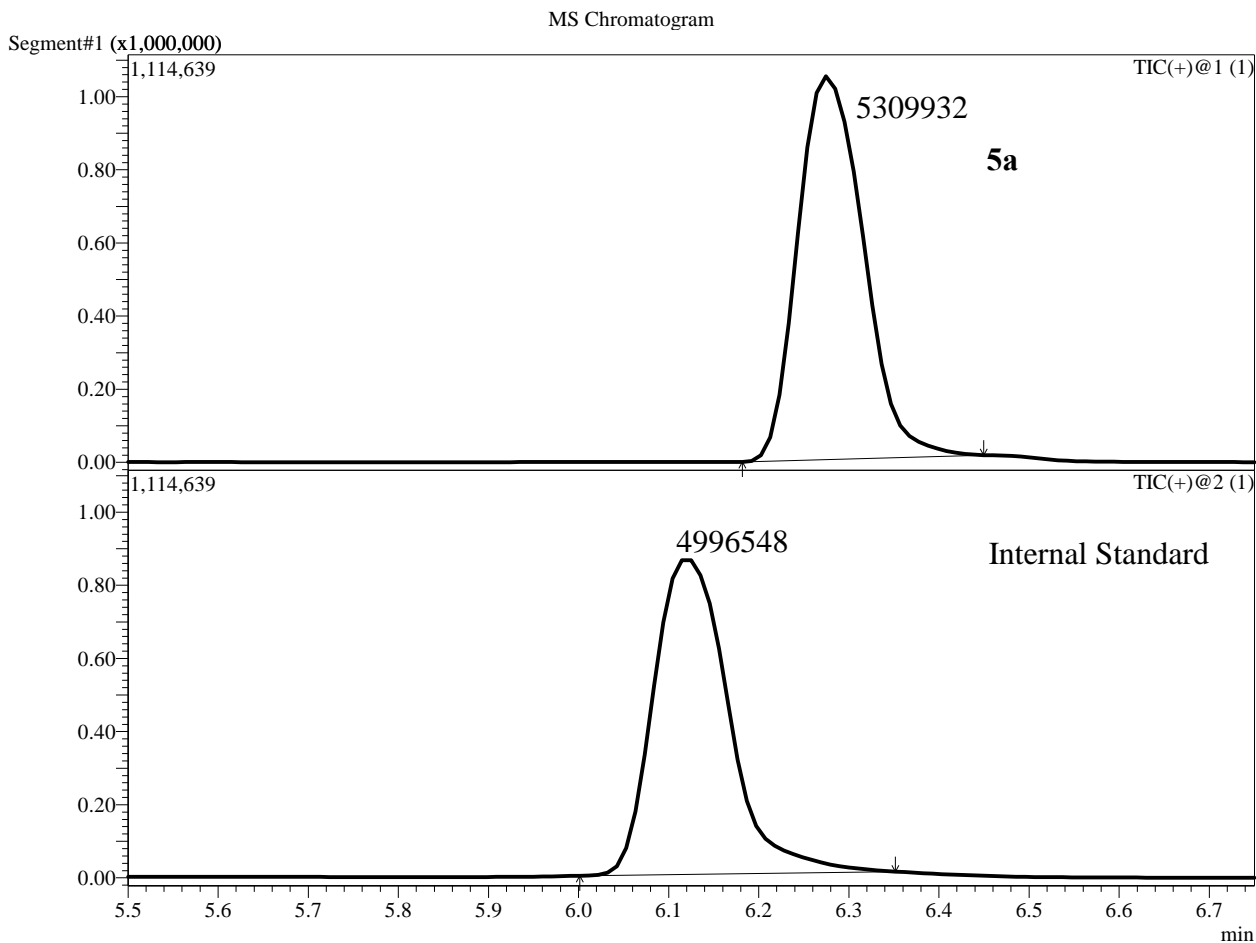

MASS Peak Table TIC

| Peak# | Ret. Time | m/z | Area    | Compound Name | Event# |
|-------|-----------|-----|---------|---------------|--------|
| 1     | 6.275     | TIC | 5309932 |               | 1-1    |
| 2     | 6.120     | TIC | 4996548 |               | 1-2    |

Date Acquired : 3/30/2016 6:14:50 PM  
 Sample ID : 2h ipB Brain  
 Injection Volume : 10  
 Data File : 6.lcd  
 Method File : V1.lcm

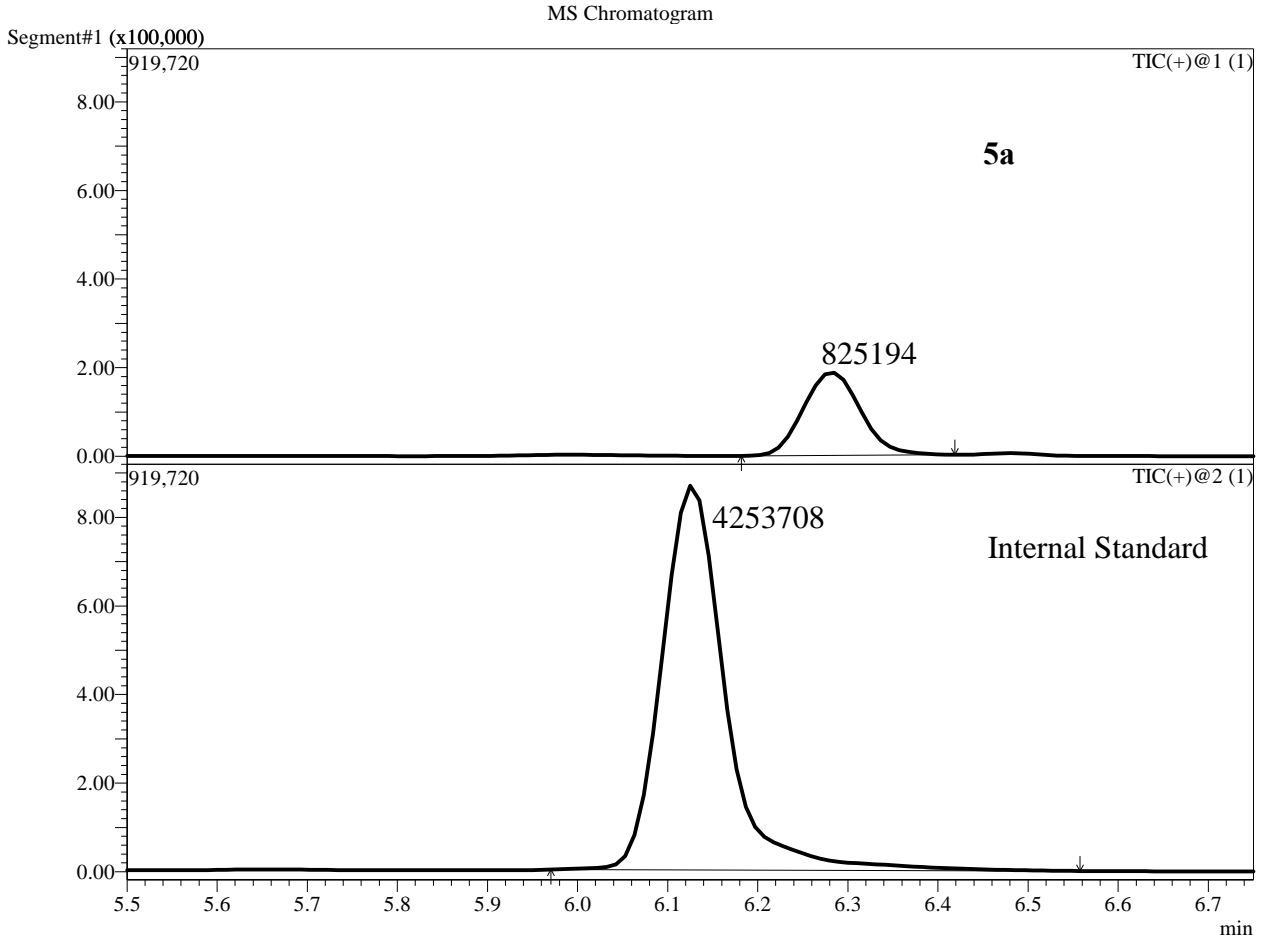

MASS Peak Table TIC

| Peak# | Ret. Time | m/z | Area    | Compound Name | Event# |
|-------|-----------|-----|---------|---------------|--------|
| 1     | 6.282     | TIC | 825194  |               | 1-1    |
| 2     | 6.127     | TIC | 4253708 |               | 1-2    |

Date Acquired : 3/31/2016 10:23:50 AM  
 Sample ID : 2h ipB Plasma  
 Injection Volume : 10  
 Data File : 30.lcd  
 Method File : V1.lcm

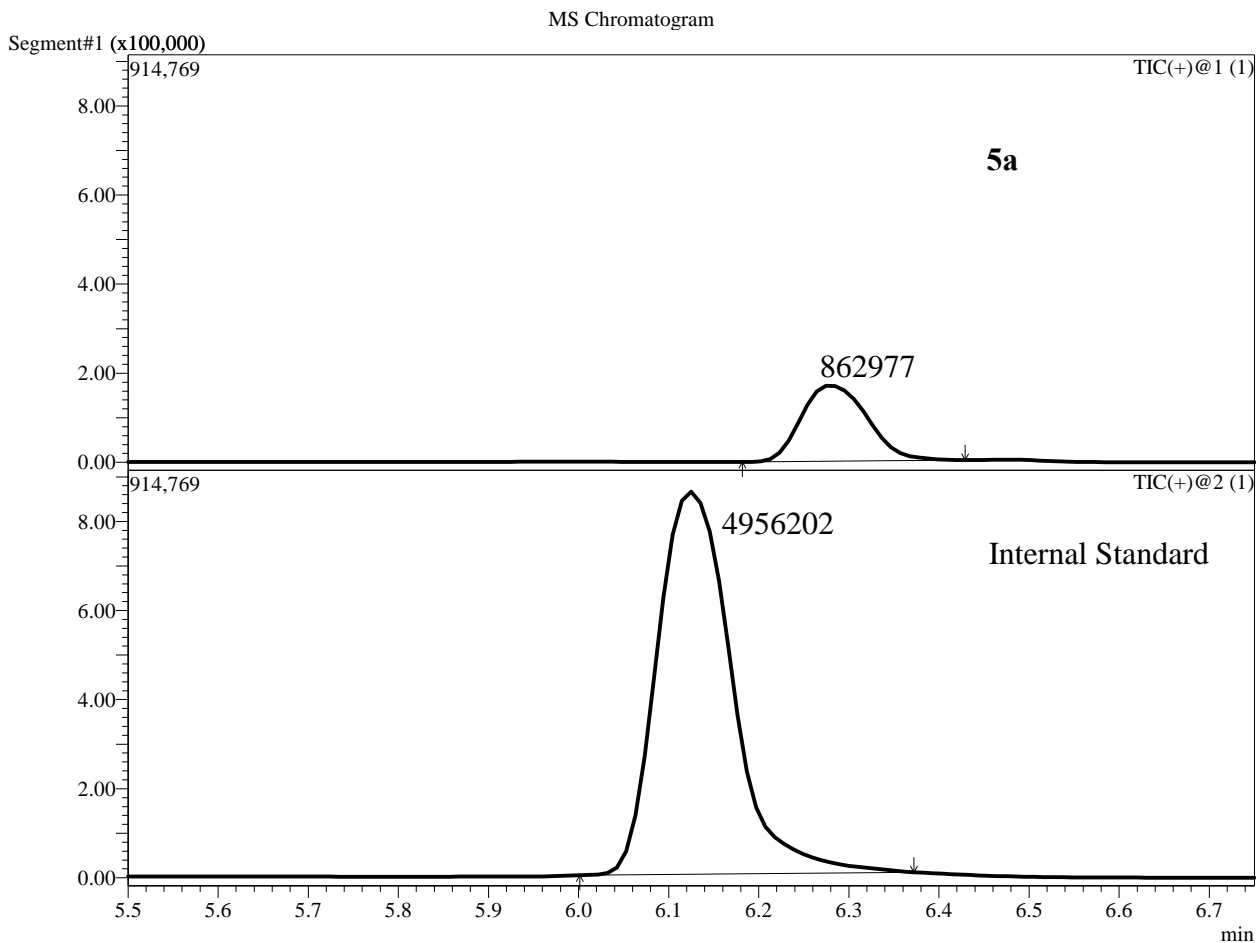

MASS Peak Table TIC

| Peak# | Ret. Time | m/z | Area    | Compound Name | Event# |
|-------|-----------|-----|---------|---------------|--------|
| 1     | 6.279     | TIC | 862977  |               | 1-1    |
| 2     | 6.125     | TIC | 4956202 |               | 1-2    |

Sample Information

Date Acquired : 3/30/2016 6:25:21 PM  
 Sample ID : 2h ipC Brain  
 Injection Volume : 10  
 Data File : 7.lcd  
 Method File : V1.lcm

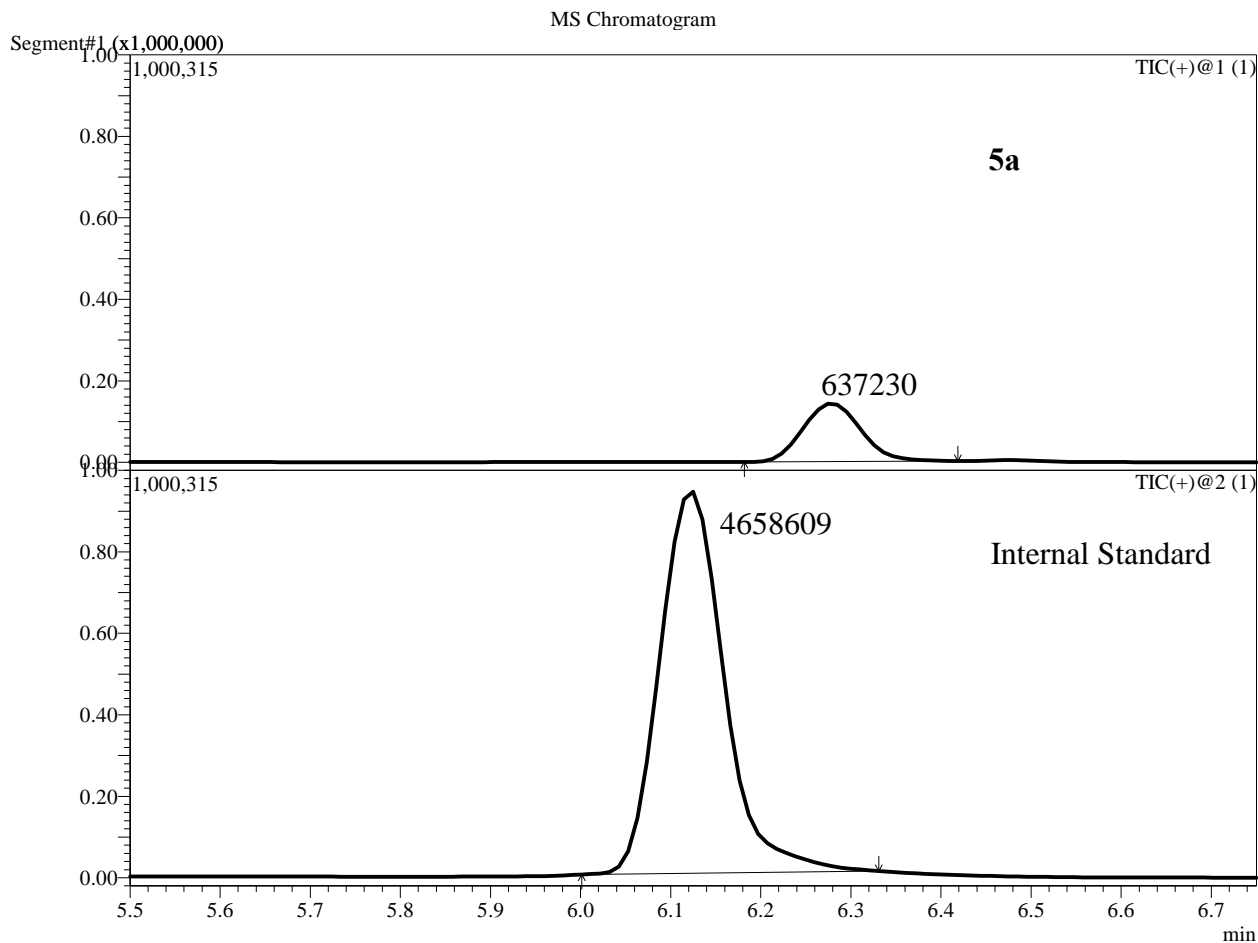

MASS Peak Table TIC

| Peak# | Ret. Time | m/z | Area    | Compound Name | Event# |
|-------|-----------|-----|---------|---------------|--------|
| 1     | 6.278     | TIC | 637230  |               | 1-1    |
| 2     | 6.122     | TIC | 4658609 |               | 1-2    |

Date Acquired : 3/31/2016 10:34:20 AM  
 Sample ID : 2h ipC Plasma  
 Injection Volume : 10  
 Data File : 31.lcd  
 Method File : V1.lcm

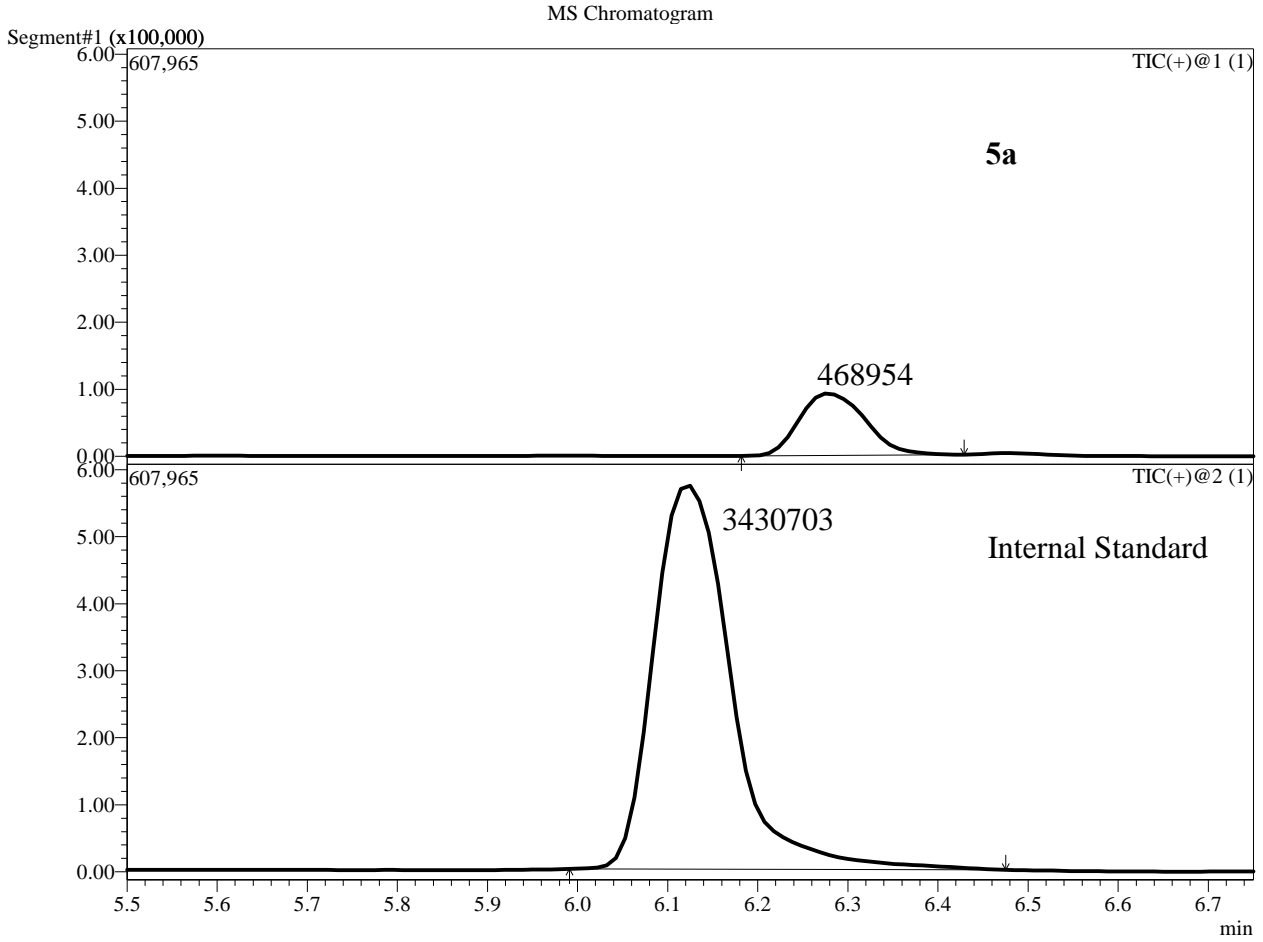

MASS Peak Table TIC

| Peak# | Ret. Time | m/z | Area    | Compound Name | Event# |
|-------|-----------|-----|---------|---------------|--------|
| 1     | 6.278     | TIC | 468954  |               | 1-1    |
| 2     | 6.122     | TIC | 3430703 |               | 1-2    |



Date Acquired : 3/30/2016 6:35:52 PM  
 Sample ID : 2h ipD Brain  
 Injection Volume : 10  
 Data File : 8.lcd  
 Method File : V1.lcm

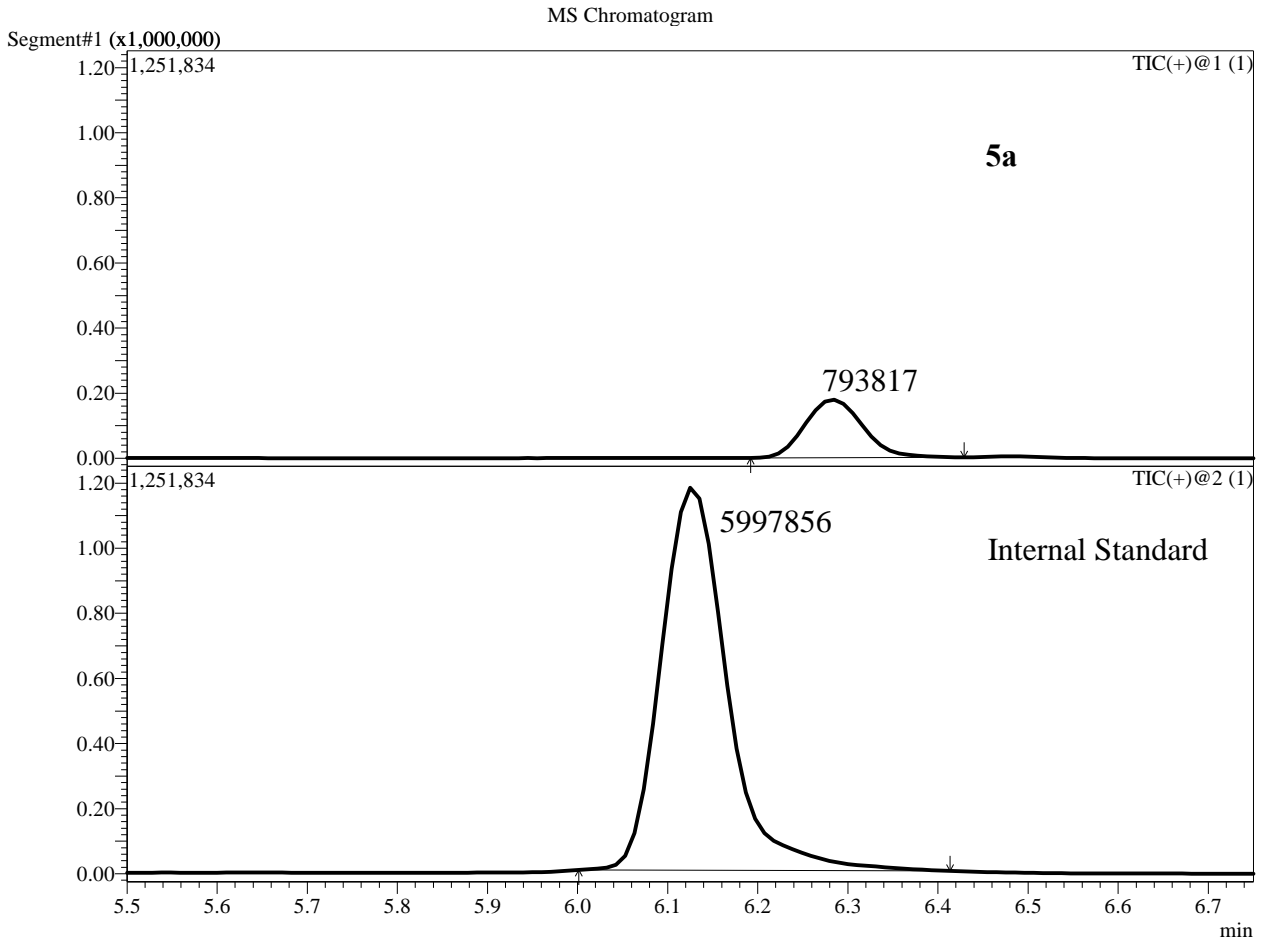

MASS Peak Table TIC

| Peak# | Ret. Time | m/z | Area    | Compound Name | Event# |
|-------|-----------|-----|---------|---------------|--------|
| 1     | 6.283     | TIC | 793817  |               | 1-1    |
| 2     | 6.127     | TIC | 5997856 |               | 1-2    |

Date Acquired : 3/31/2016 10:44:51 AM  
 Sample ID : 2h ipD Plasma  
 Injection Volume : 10  
 Data File : 32.lcd  
 Method File : V1.lcm

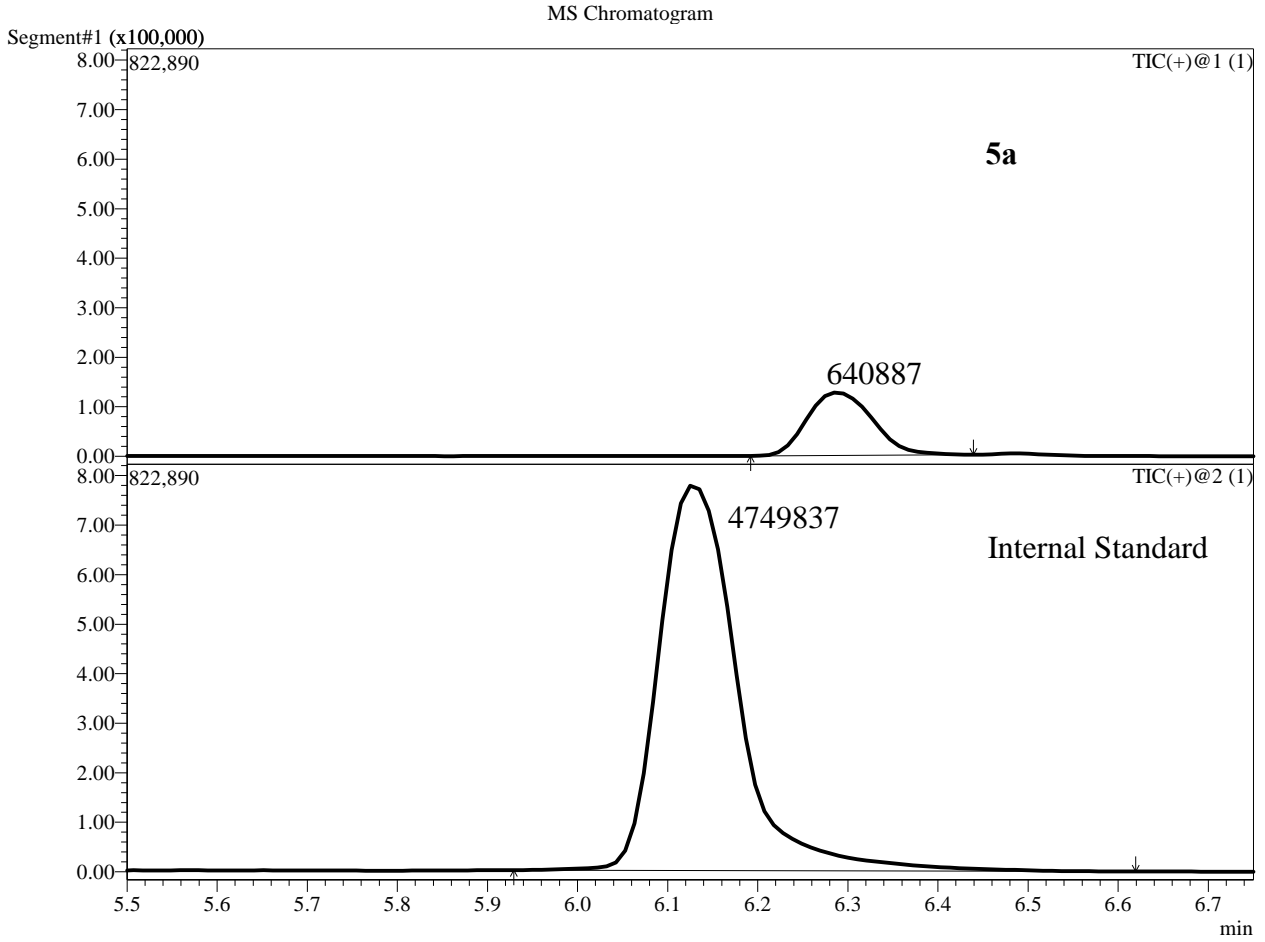

MASS Peak Table TIC

| Peak# | Ret. Time | m/z | Area    | Compound Name | Event# |
|-------|-----------|-----|---------|---------------|--------|
| 1     | 6.288     | TIC | 640887  |               | 1-1    |
| 2     | 6.129     | TIC | 4749837 |               | 1-2    |

Date Acquired : 3/30/2016 6:46:23 PM  
 Sample ID : 12h ipA Brain  
 Injection Volume : 10  
 Data File : 9.lcd  
 Method File : V1.lcm

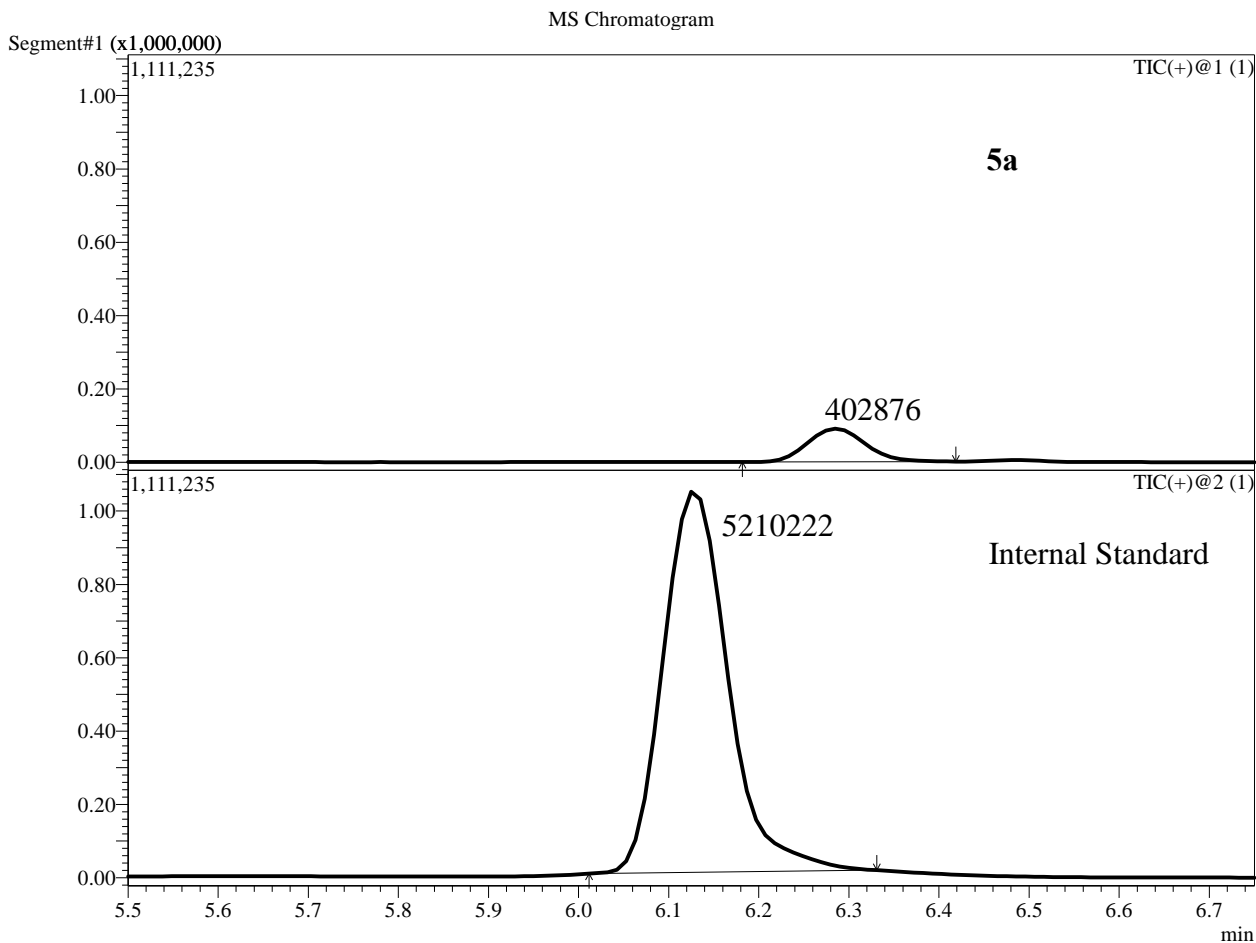

MASS Peak Table TIC

| Peak# | Ret. Time | m/z | Area    | Compound Name | Event# |
|-------|-----------|-----|---------|---------------|--------|
| 1     | 6.285     | TIC | 402876  |               | 1-1    |
| 2     | 6.128     | TIC | 5210222 |               | 1-2    |

Date Acquired : 3/31/2016 10:55:21 AM  
 Sample ID : 12h ipA Plasma  
 Injection Volume : 10  
 Data File : 33.lcd  
 Method File : V1.lcm

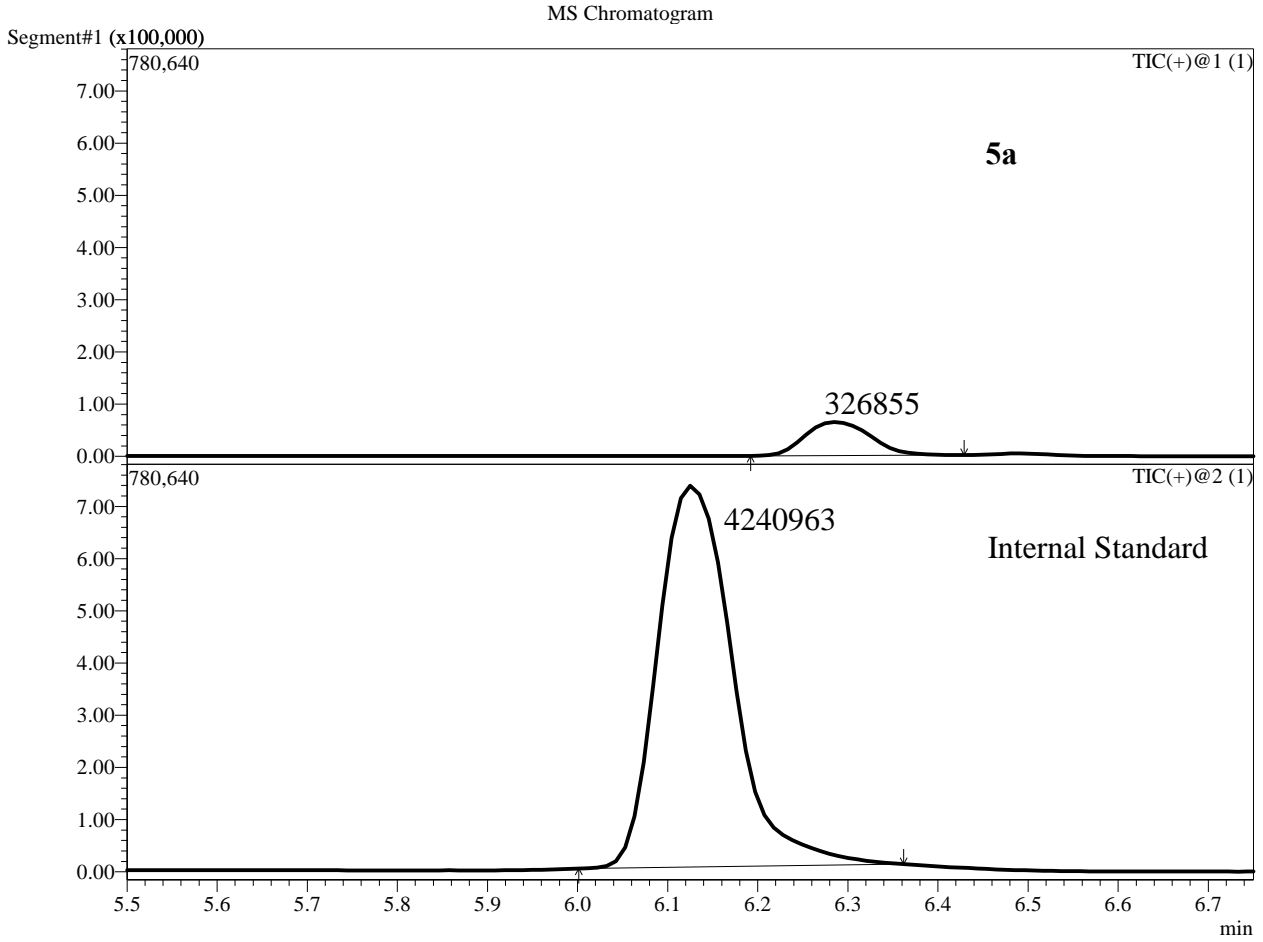

MASS Peak Table TIC

| Peak# | Ret. Time | m/z | Area    | Compound Name | Event# |
|-------|-----------|-----|---------|---------------|--------|
| 1     | 6.285     | TIC | 326855  |               | 1-1    |
| 2     | 6.126     | TIC | 4240963 |               | 1-2    |

Date Acquired : 3/30/2016 6:56:53 PM  
 Sample ID : 12h ipB Brain  
 Injection Volume : 10  
 Data File : 10.lcd  
 Method File : V1.lcm

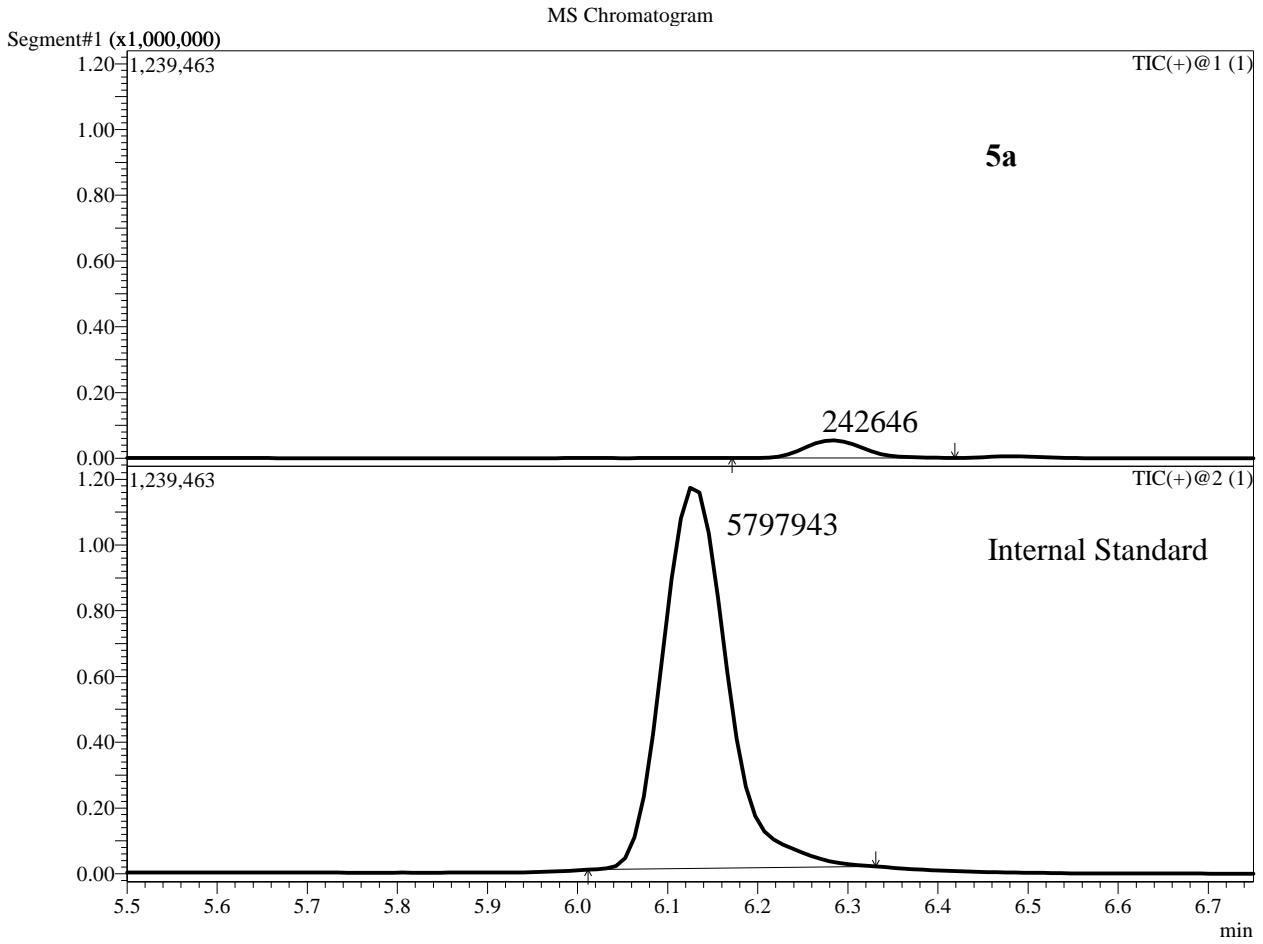

MASS Peak Table TIC

| Peak# | Ret. Time | m/z | Area    | Compound Name | Event# |
|-------|-----------|-----|---------|---------------|--------|
| 1     | 6.283     | TIC | 242646  |               | 1-1    |
| 2     | 6.129     | TIC | 5797943 |               | 1-2    |

Date Acquired : 3/31/2016 11:05:51 AM  
 Sample ID : 12h ipB Plasma  
 Injection Volume : 10  
 Data File : 34.lcd  
 Method File : V1.lcm

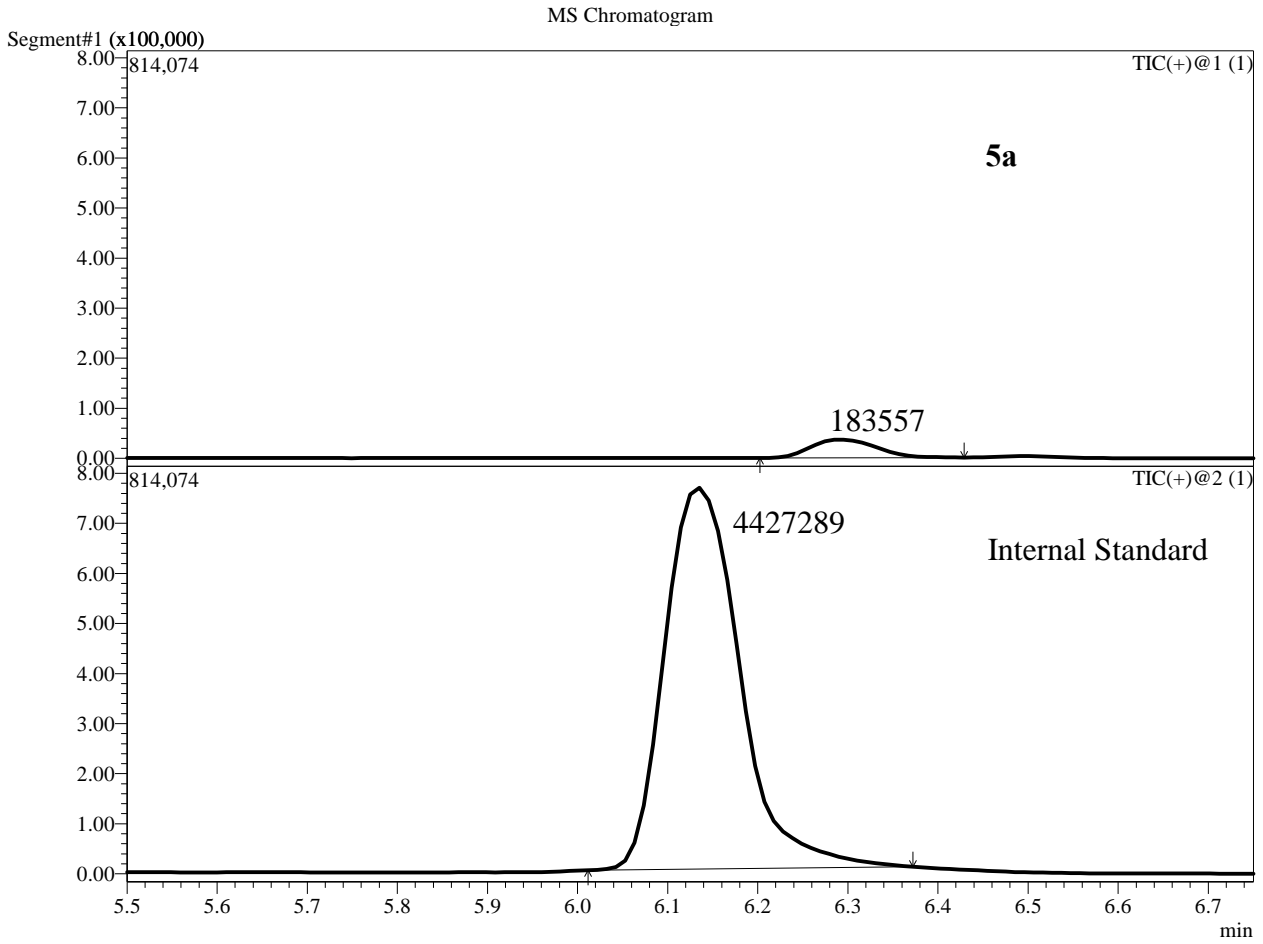

MASS Peak Table TIC

| Peak# | Ret. Time | m/z | Area    | Compound Name | Event# |
|-------|-----------|-----|---------|---------------|--------|
| 1     | 6.291     | TIC | 183557  |               | 1-1    |
| 2     | 6.134     | TIC | 4427289 |               | 1-2    |

Sample Information

Date Acquired : 3/30/2016 7:07:24 PM  
 Sample ID : 12h ipC Brain  
 Injection Volume : 10  
 Data File : 11.lcd  
 Method File : V1.lcm

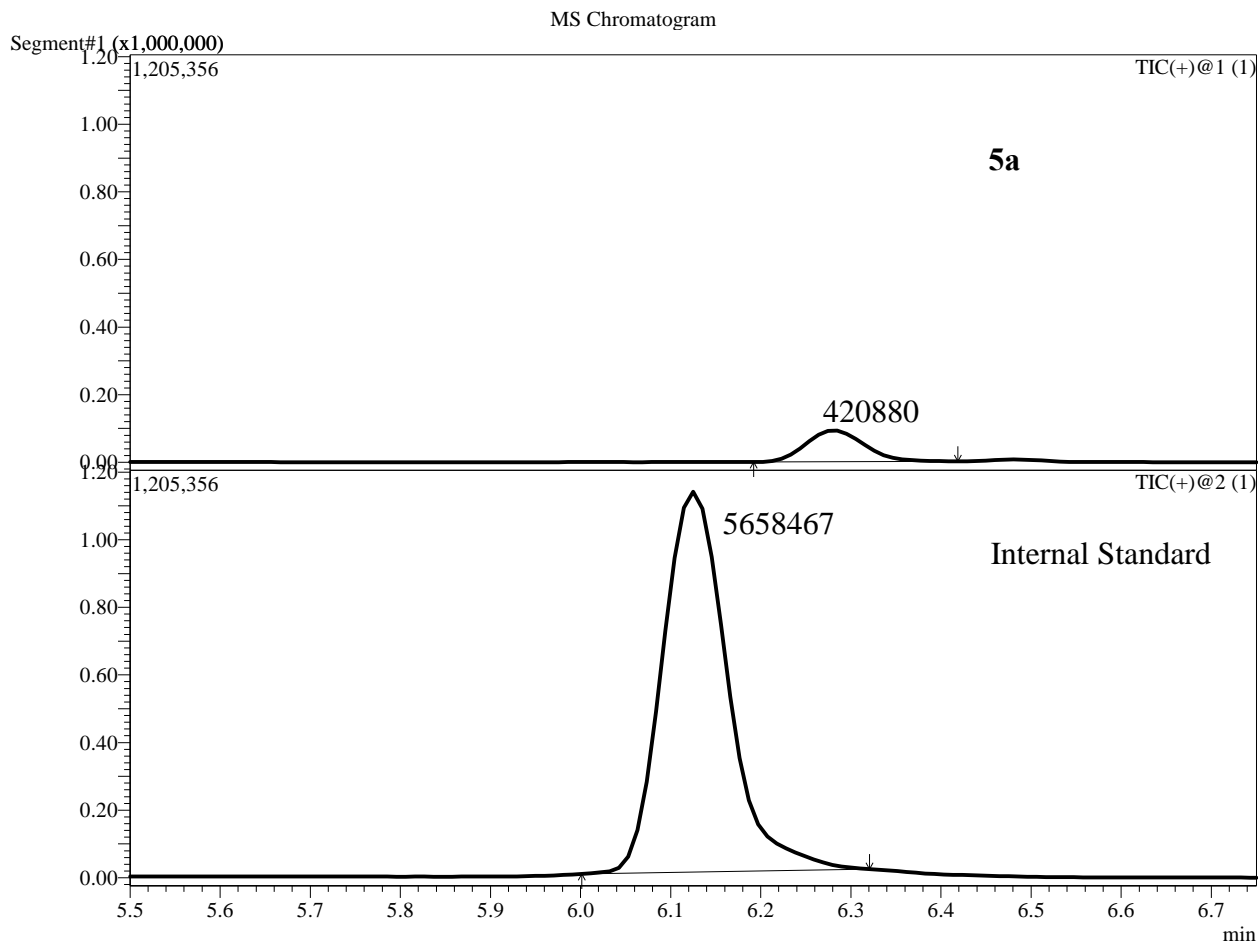

MASS Peak Table TIC

| Peak# | Ret. Time | m/z | Area    | Compound Name | Event# |
|-------|-----------|-----|---------|---------------|--------|
| 1     | 6.281     | TIC | 420880  |               | 1-1    |
| 2     | 6.125     | TIC | 5658467 |               | 1-2    |

Date Acquired : 3/31/2016 11:16:21 AM  
 Sample ID : 12h ipC Plasma  
 Injection Volume : 10  
 Data File : 35.lcd  
 Method File : V1.lcm

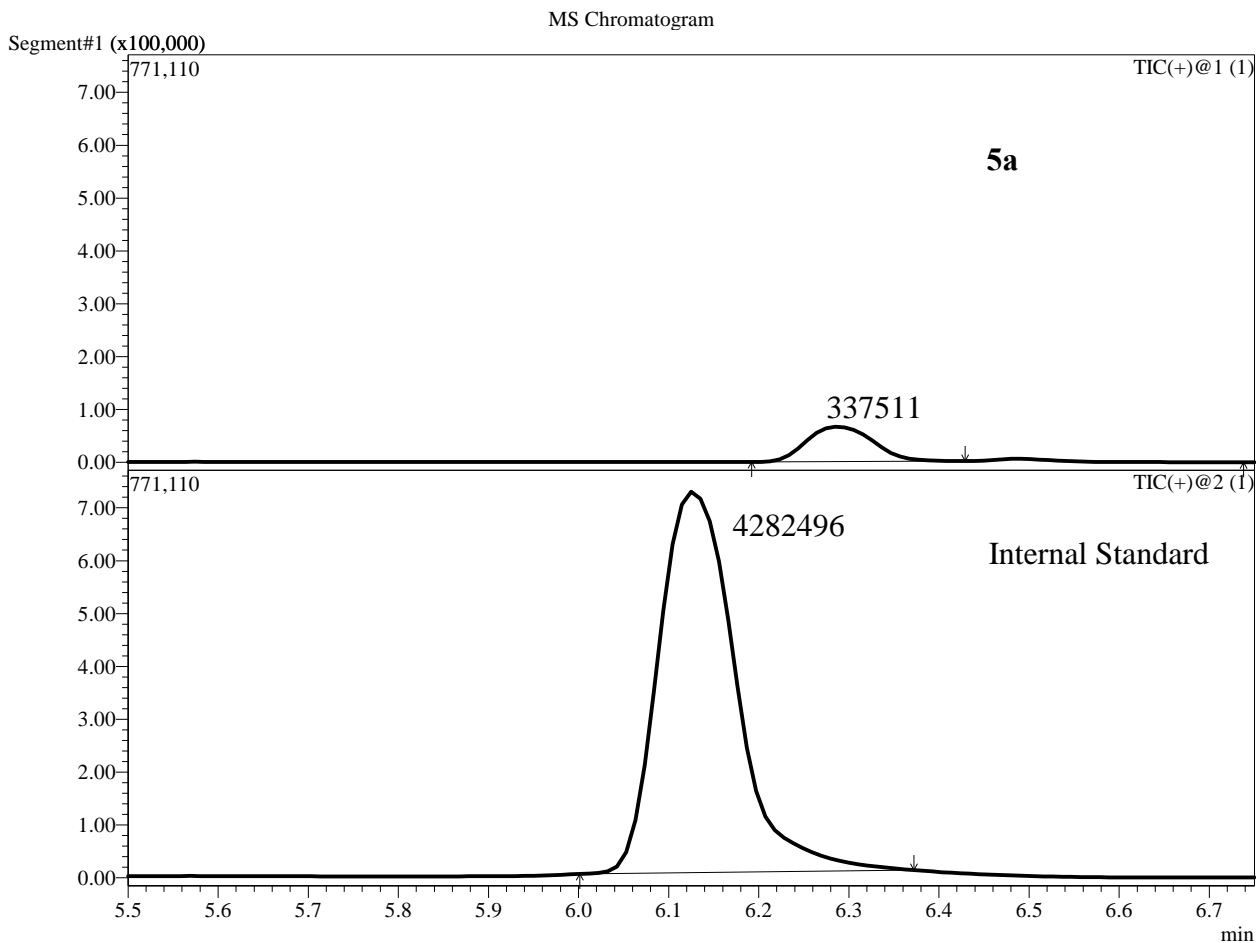

MASS Peak Table TIC

| Peak# | Ret. Time | m/z | Area    | Compound Name | Event# |
|-------|-----------|-----|---------|---------------|--------|
| 1     | 6.286     | TIC | 337511  |               | 1-1    |
| 2     | 6.127     | TIC | 4282496 |               | 1-2    |



**Sample Information**  
 Date Acquired : 3/30/2016 7:17:55 PM  
 Sample ID : 12h ipD Brain  
 Injection Volume : 10  
 Data File : 12.lcd  
 Method File : V1.lcm

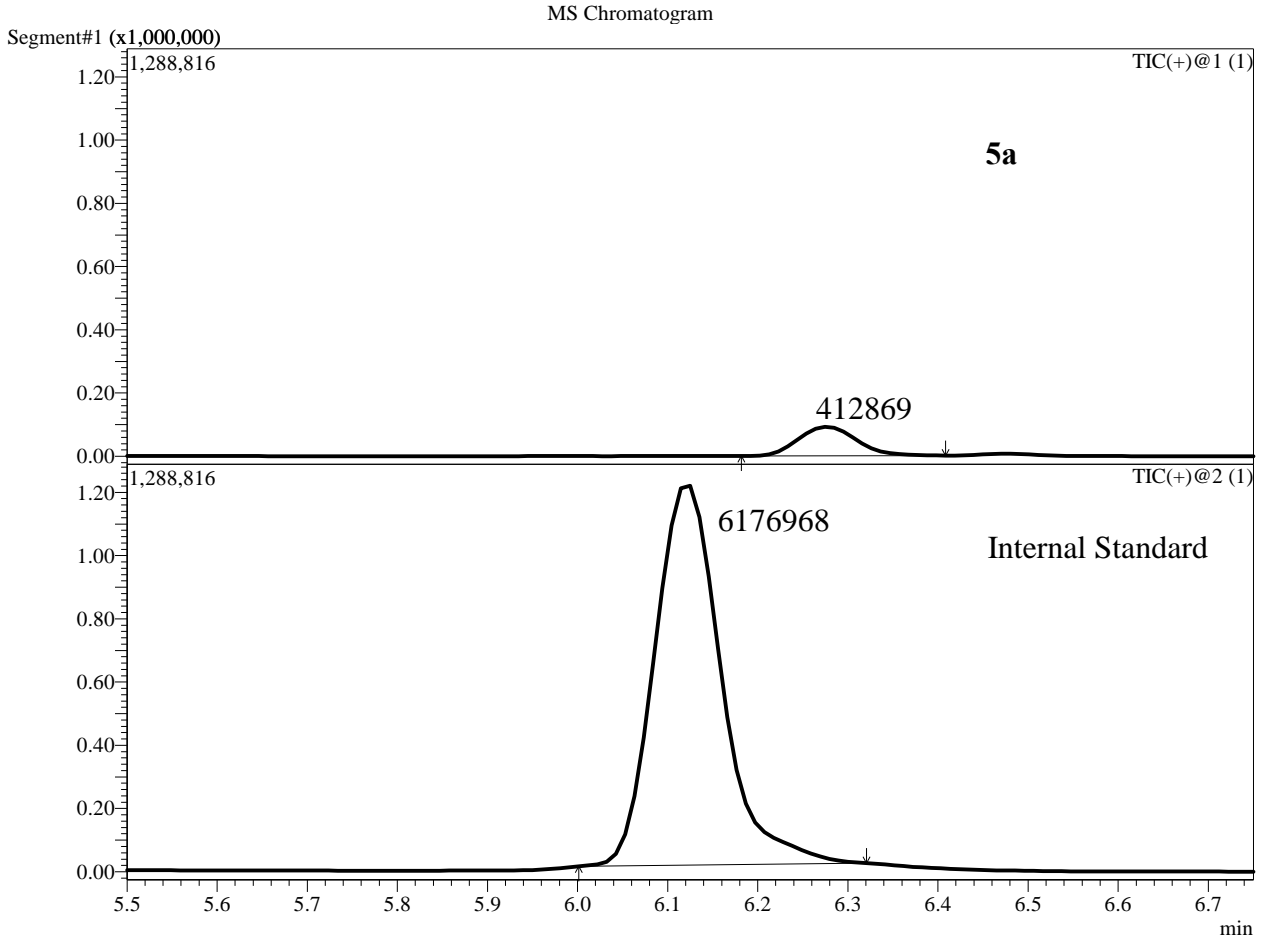

MASS Peak Table TIC

| Peak# | Ret. Time | m/z | Area    | Compound Name | Event# |
|-------|-----------|-----|---------|---------------|--------|
| 1     | 6.276     | TIC | 412869  |               | 1-1    |
| 2     | 6.121     | TIC | 6176968 |               | 1-2    |

Date Acquired : 3/31/2016 11:26:53 AM  
 Sample ID : 12h ipD Plasma  
 Injection Volume : 10  
 Data File : 36.lcd  
 Method File : V1.lcm

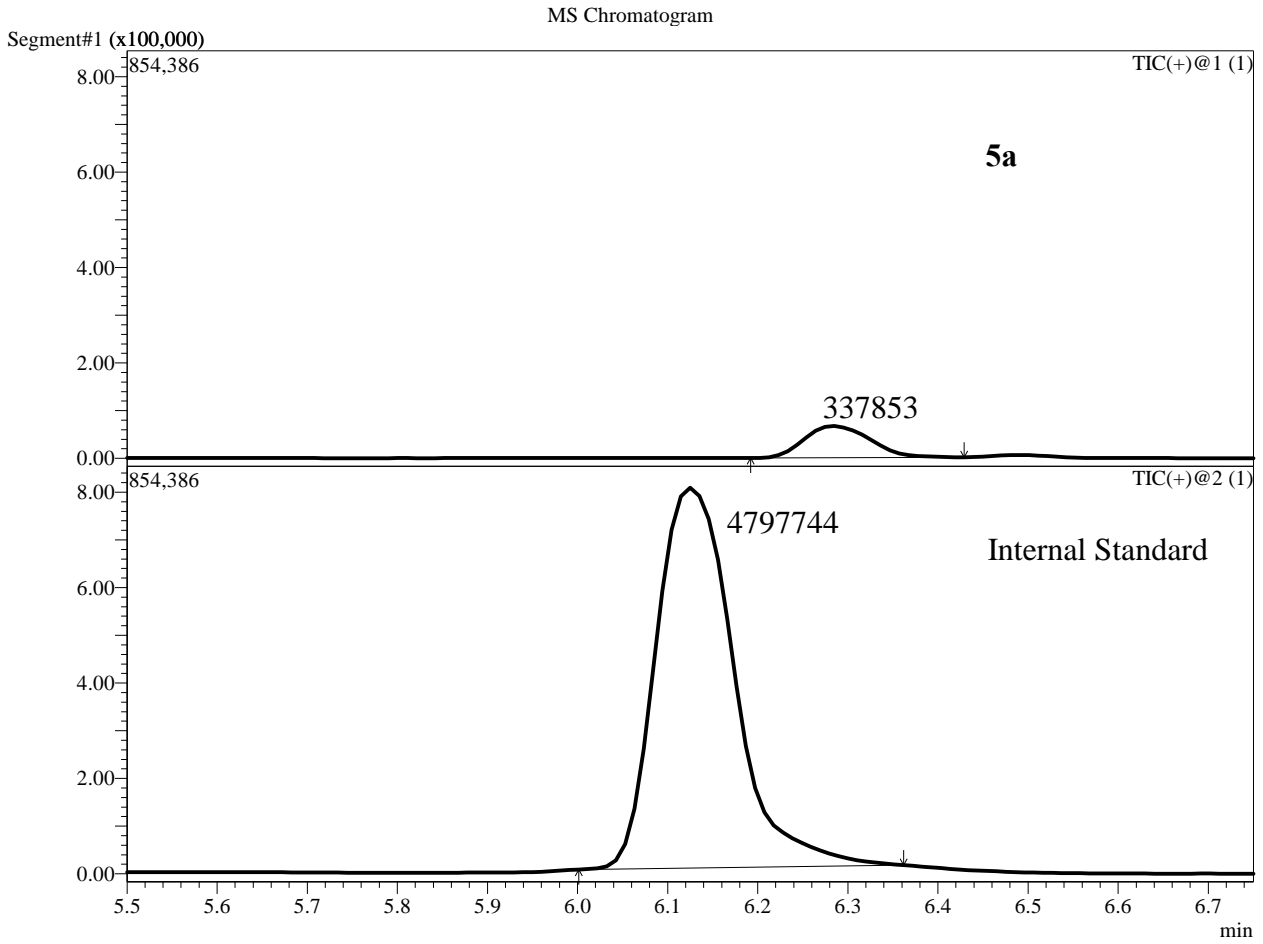

MASS Peak Table TIC

| Peak# | Ret. Time | m/z | Area    | Compound Name | Event# |
|-------|-----------|-----|---------|---------------|--------|
| 1     | 6.283     | TIC | 337853  |               | 1-1    |
| 2     | 6.125     | TIC | 4797744 |               | 1-2    |

**Sample Information**  
 Date Acquired : 3/30/2016 7:28:26 PM  
 Sample ID : 1h poA Brain  
 Injection Volume : 10  
 Data File : 13.lcd  
 Method File : V1.lcm

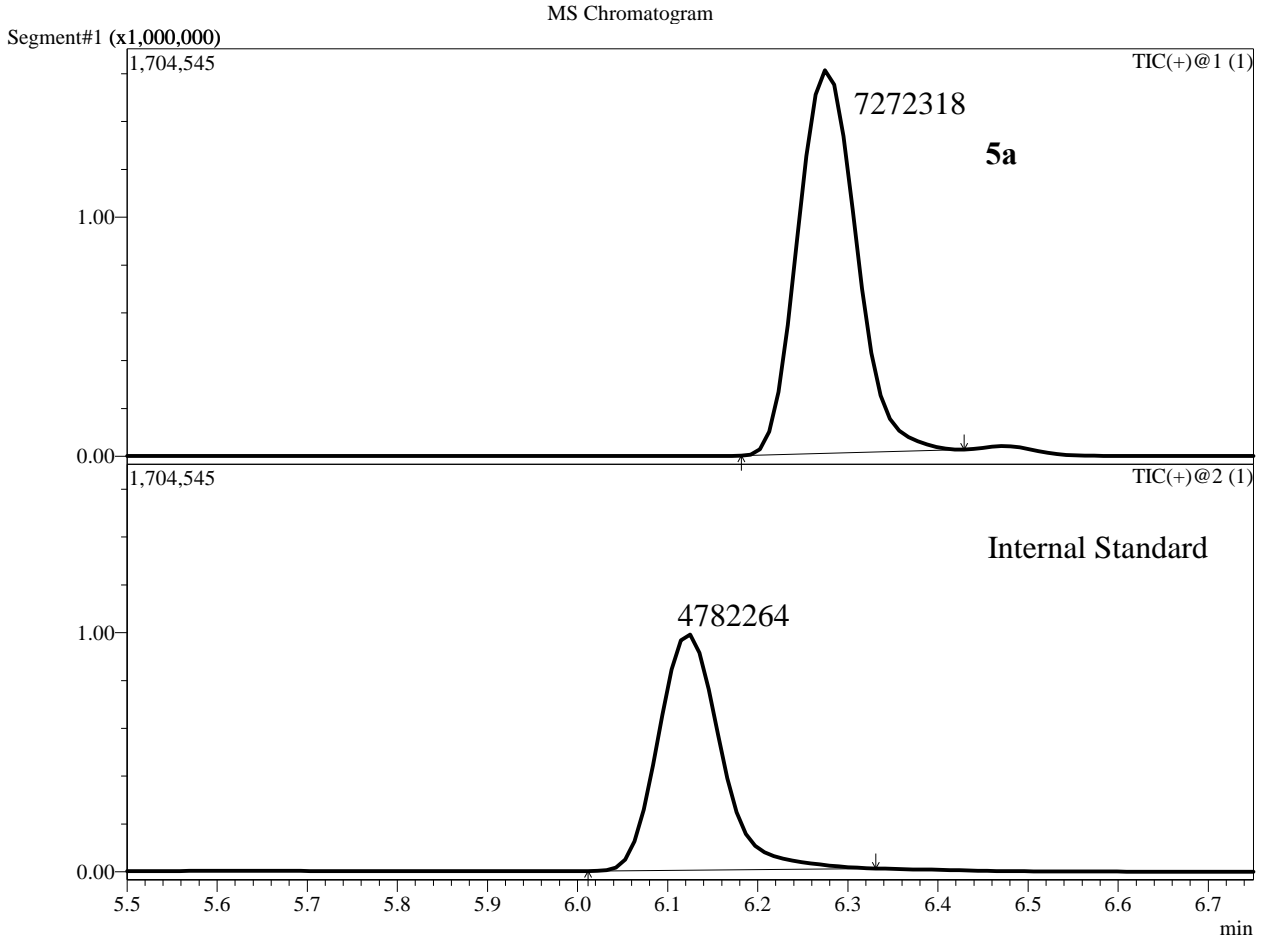

MASS Peak Table TIC

| Peak# | Ret. Time | m/z | Area    | Compound Name | Event# |
|-------|-----------|-----|---------|---------------|--------|
| 1     | 6.276     | TIC | 7272318 |               | 1-1    |
| 2     | 6.122     | TIC | 4782264 |               | 1-2    |

Date Acquired : 3/31/2016 11:37:24 AM  
 Sample ID : 1h poA Plasma  
 Injection Volume : 10  
 Data File : 37.lcd  
 Method File : V1.lcm

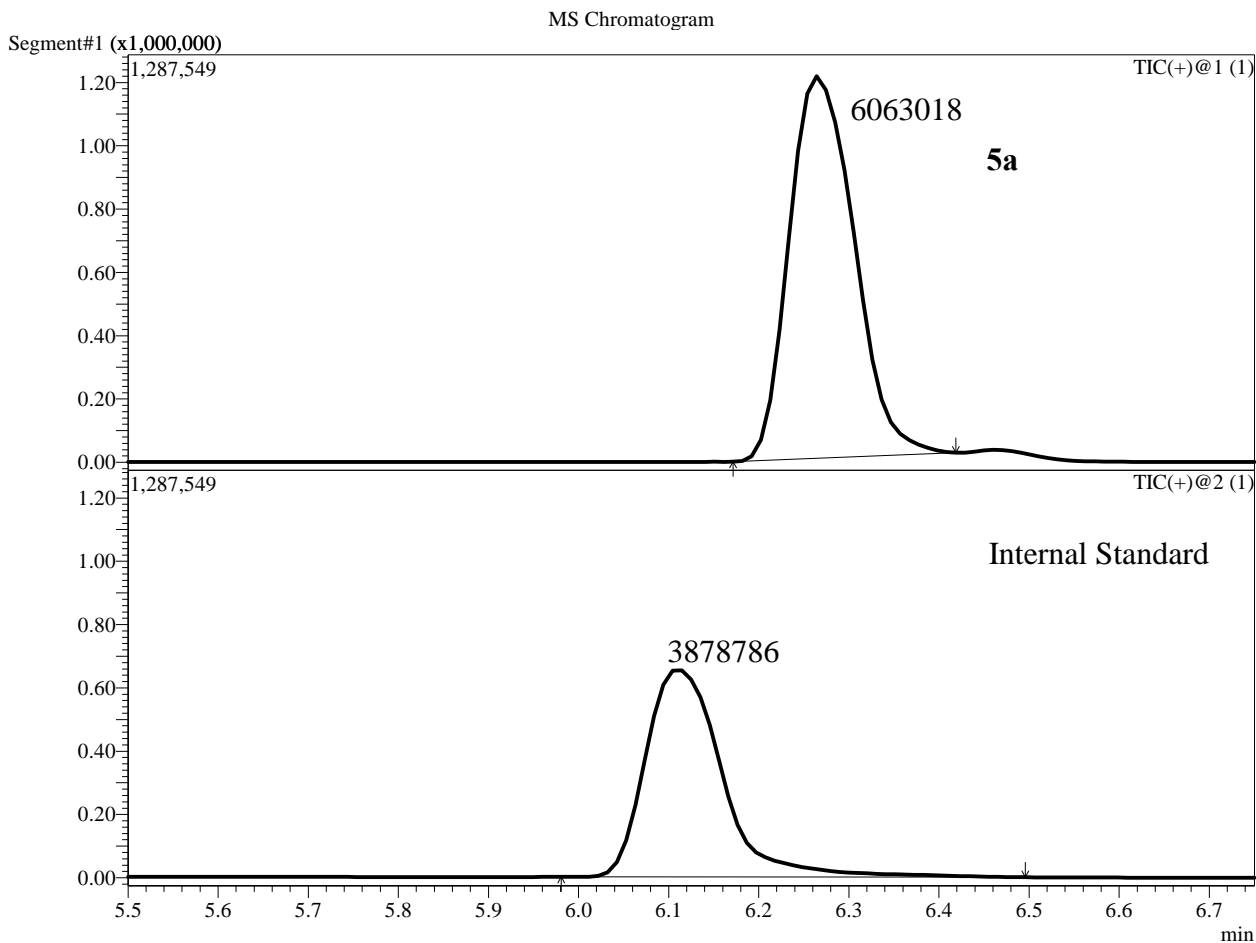

MASS Peak Table TIC

| Peak# | Ret. Time | m/z | Area    | Compound Name | Event# |
|-------|-----------|-----|---------|---------------|--------|
| 1     | 6.265     | TIC | 6063018 |               | 1-1    |
| 2     | 6.110     | TIC | 3878786 |               | 1-2    |

Sample Information

Date Acquired : 3/30/2016 7:38:57 PM  
 Sample ID : 1h poB Brain  
 Injection Volume : 10  
 Data File : 14.lcd  
 Method File : V1.lcm

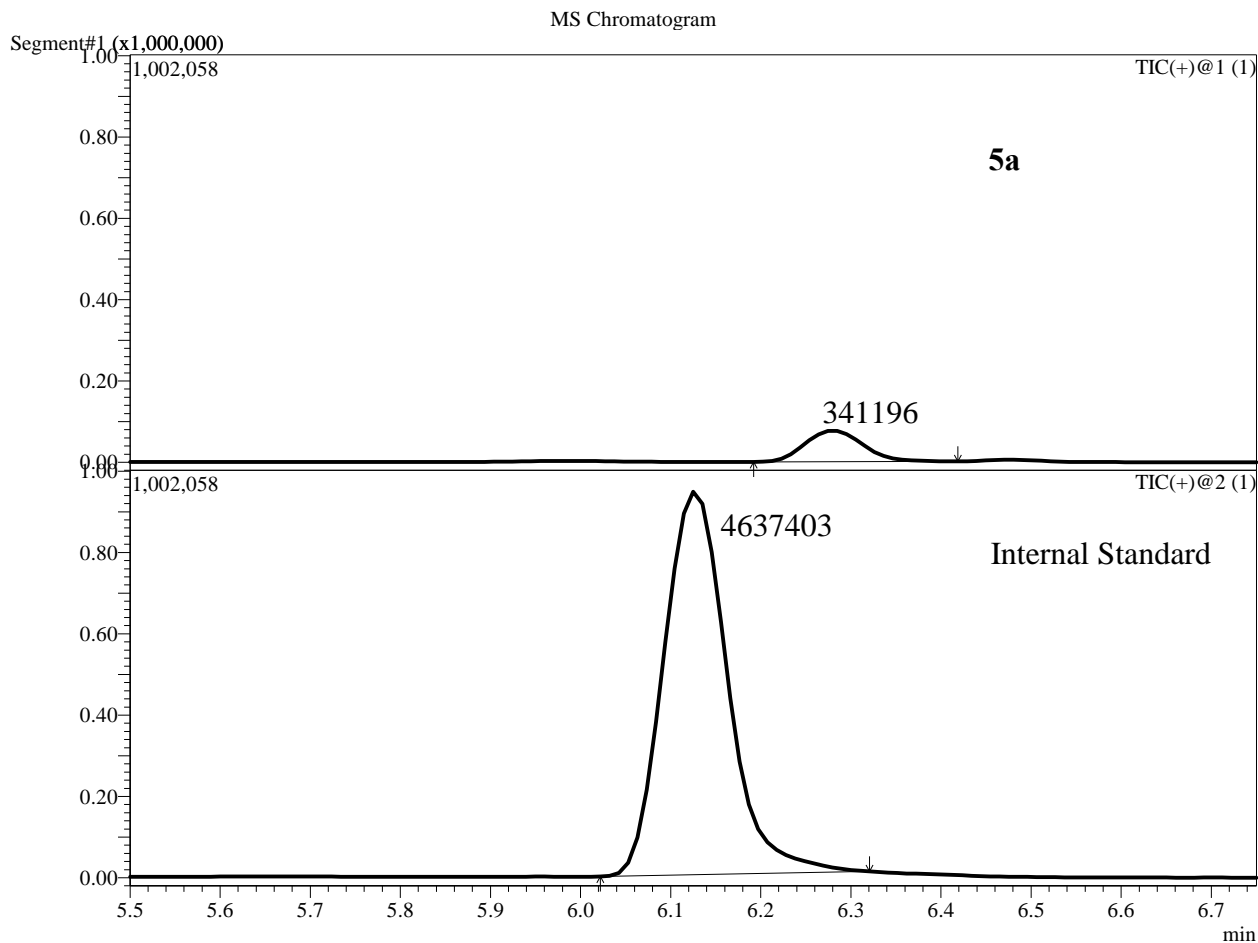

MASS Peak Table TIC

| Peak# | Ret. Time | m/z | Area    | Compound Name | Event# |
|-------|-----------|-----|---------|---------------|--------|
| 1     | 6.280     | TIC | 341196  |               | 1-1    |
| 2     | 6.127     | TIC | 4637403 |               | 1-2    |

**Sample Information**  
 Date Acquired : 3/31/2016 11:47:55AM  
 Sample ID : 1h poB Plasma  
 Injection Volume : 10  
 Data File : 38.lcd  
 Method File : V1.lcm

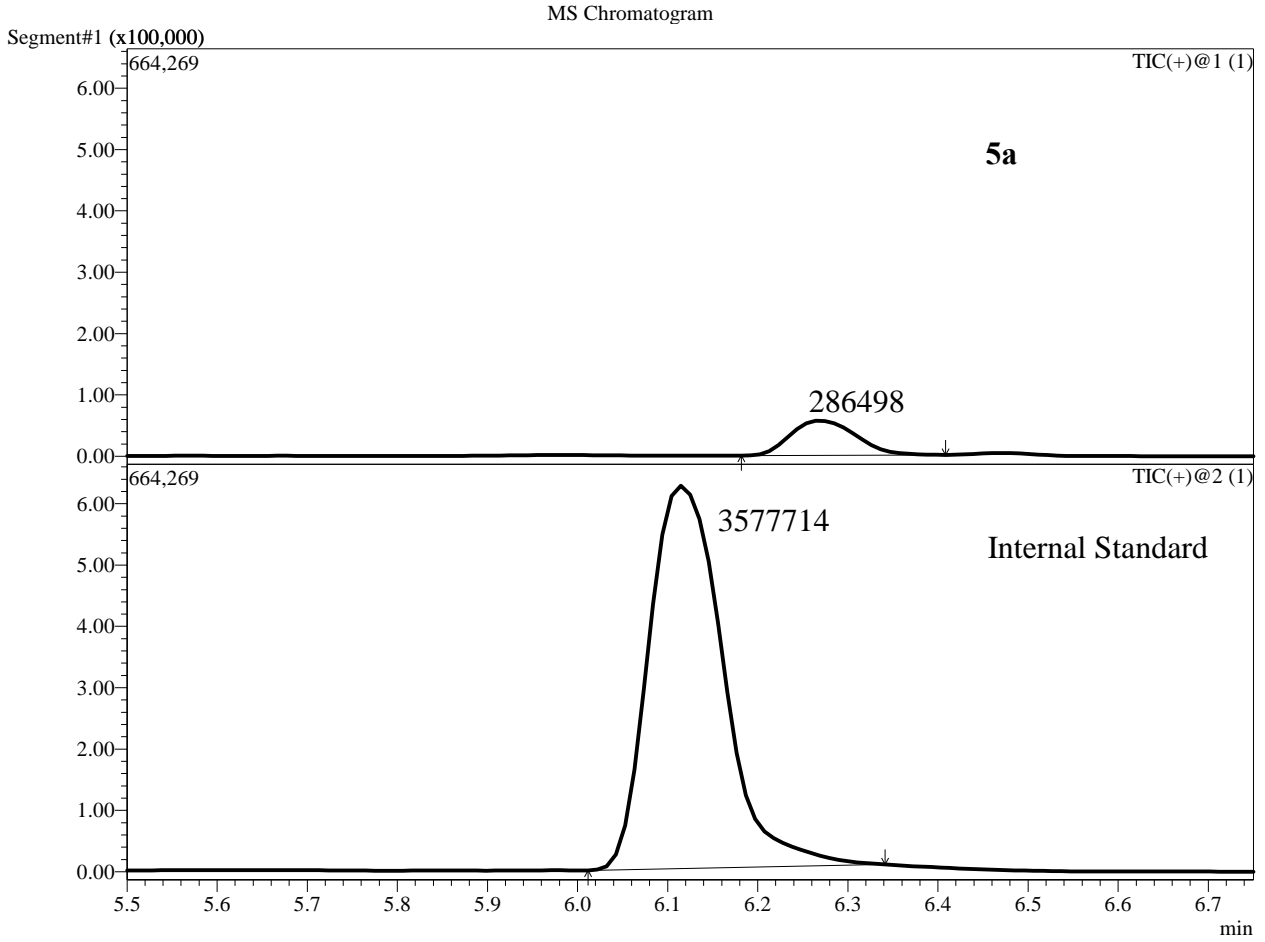

MASS Peak Table TIC

| Peak# | Ret. Time | m/z | Area    | Compound Name | Event# |
|-------|-----------|-----|---------|---------------|--------|
| 1     | 6.268     | TIC | 286498  |               | 1-1    |
| 2     | 6.115     | TIC | 3577714 |               | 1-2    |

Sample Information

Date Acquired : 3/30/2016 7:49:29 PM  
 Sample ID : 1h poC Brain  
 Injection Volume : 10  
 Data File : 15.lcd  
 Method File : V1.lcm

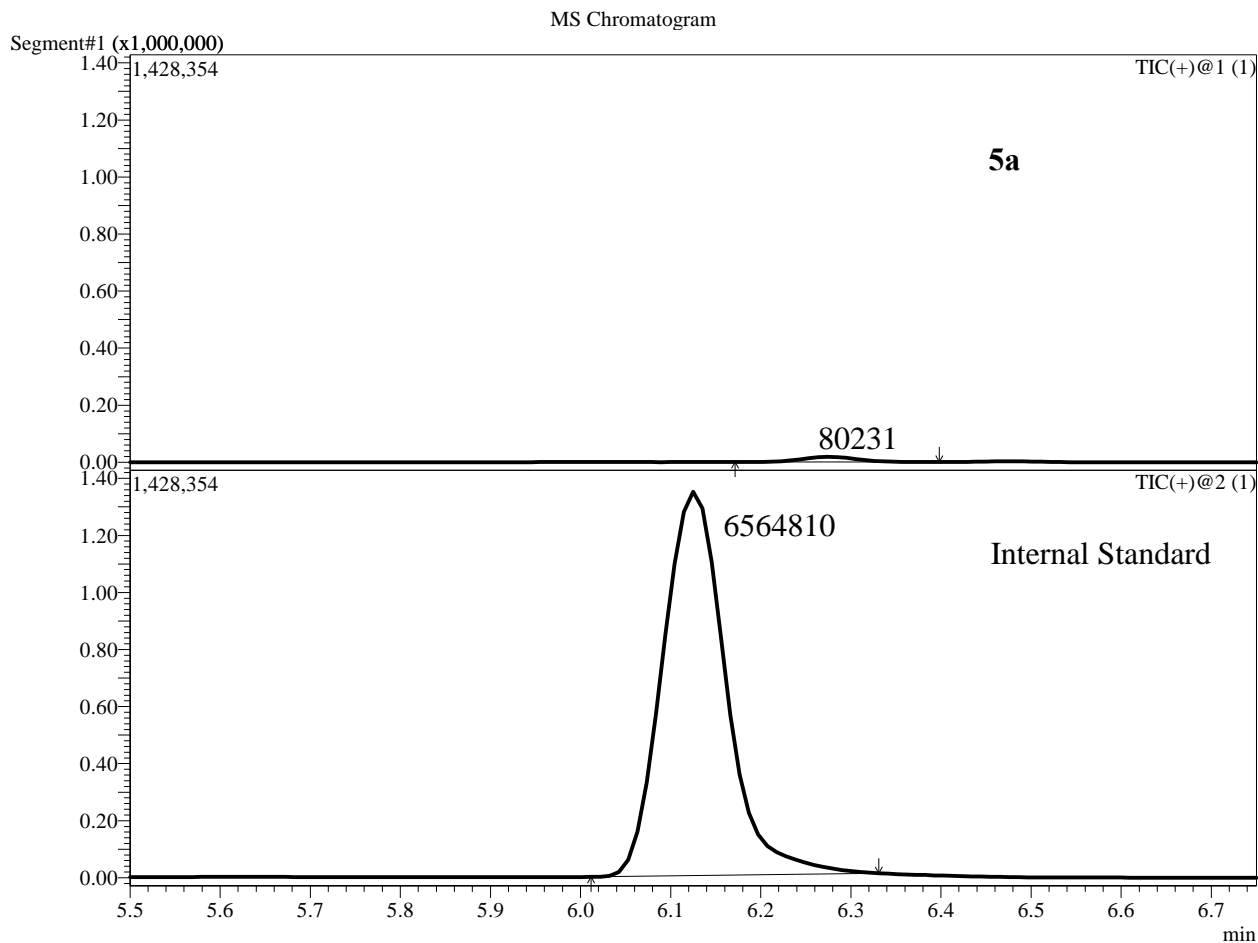

MASS Peak Table TIC

| Peak# | Ret. Time | m/z | Area    | Compound Name | Event# |
|-------|-----------|-----|---------|---------------|--------|
| 1     | 6.275     | TIC | 80231   |               | 1-1    |
| 2     | 6.126     | TIC | 6564810 |               | 1-2    |

**Sample Information**  
 Date Acquired : 3/31/2016 11:58:27 AM  
 Sample ID : 1h poC Plasma  
 Injection Volume : 10  
 Data File : 39.lcd  
 Method File : V1.lcm

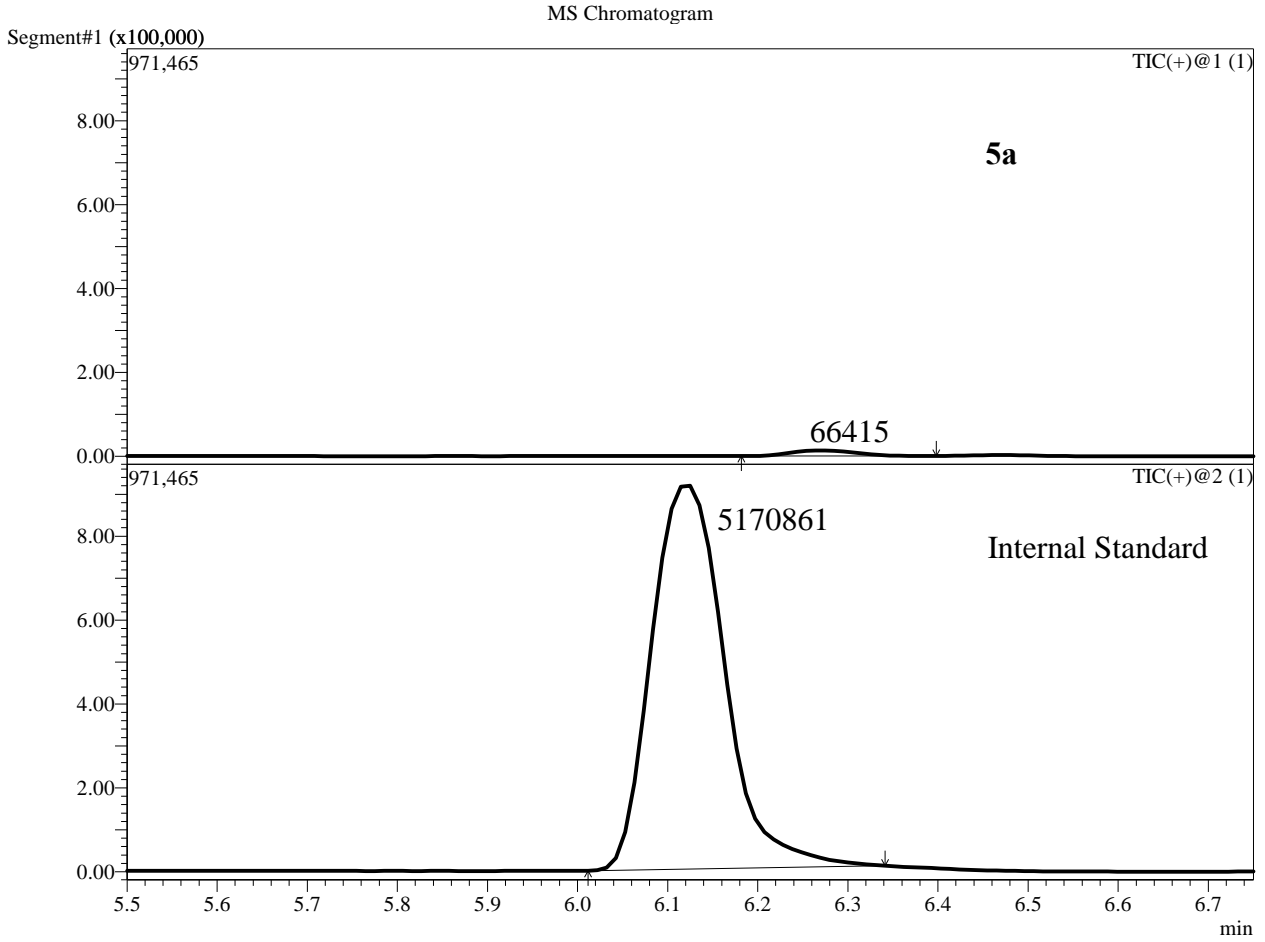

MASS Peak Table TIC

| Peak# | Ret. Time | m/z | Area    | Compound Name | Event# |
|-------|-----------|-----|---------|---------------|--------|
| 1     | 6.269     | TIC | 66415   |               | 1-1    |
| 2     | 6.121     | TIC | 5170861 |               | 1-2    |



Sample Information

Date Acquired : 3/30/2016 8:00:00 PM  
 Sample ID : 1h poD Brain  
 Injection Volume : 10  
 Data File : 16.lcd  
 Method File : V1.lcm

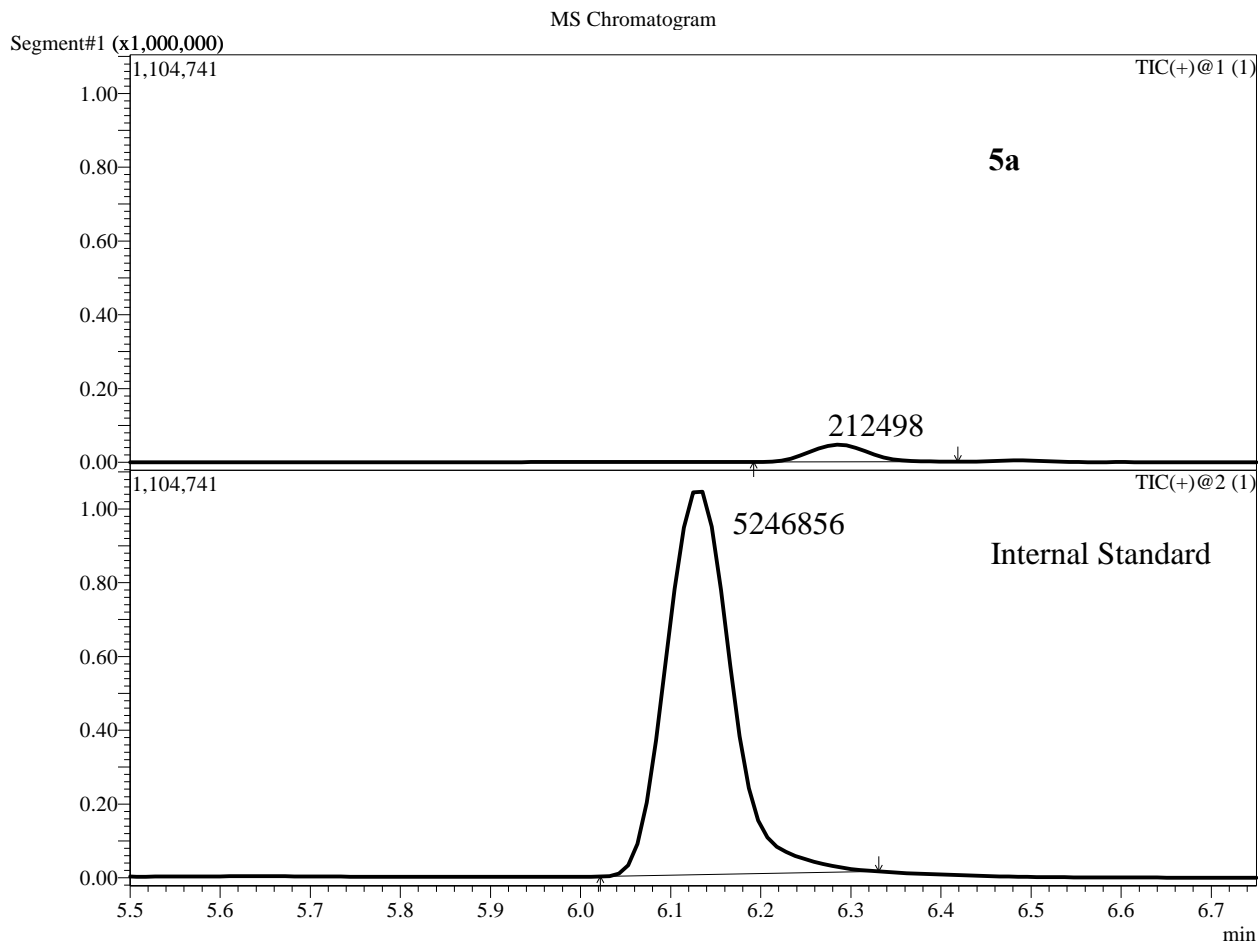

MASS Peak Table TIC

| Peak# | Ret. Time | m/z | Area    | Compound Name | Event# |
|-------|-----------|-----|---------|---------------|--------|
| 1     | 6.286     | TIC | 212498  |               | 1-1    |
| 2     | 6.130     | TIC | 5246856 |               | 1-2    |

**Sample Information**  
 Date Acquired : 3/31/2016 12:08:57 PM  
 Sample ID : 1h poD Plasma  
 Injection Volume : 10  
 Data File : 40.lcd  
 Method File : V1.lcm

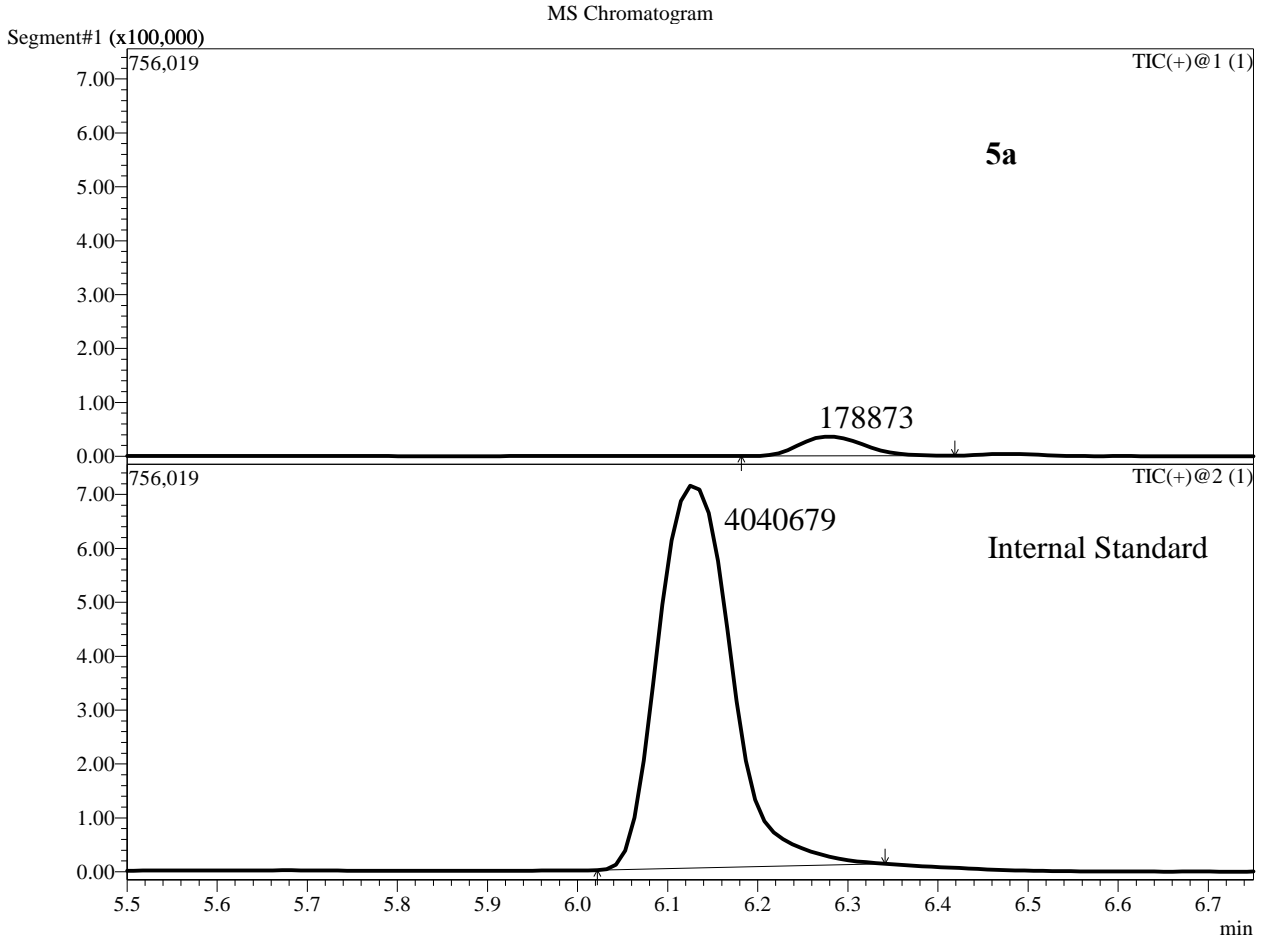

MASS Peak Table TIC

| Peak# | Ret. Time | m/z | Area    | Compound Name | Event# |
|-------|-----------|-----|---------|---------------|--------|
| 1     | 6.279     | TIC | 178873  |               | 1-1    |
| 2     | 6.128     | TIC | 4040679 |               | 1-2    |

Sample Information

Date Acquired : 3/30/2016 8:10:30 PM  
 Sample ID : 2h poA Brain  
 Injection Volume : 10  
 Data File : 17.lcd  
 Method File : V1.lcm

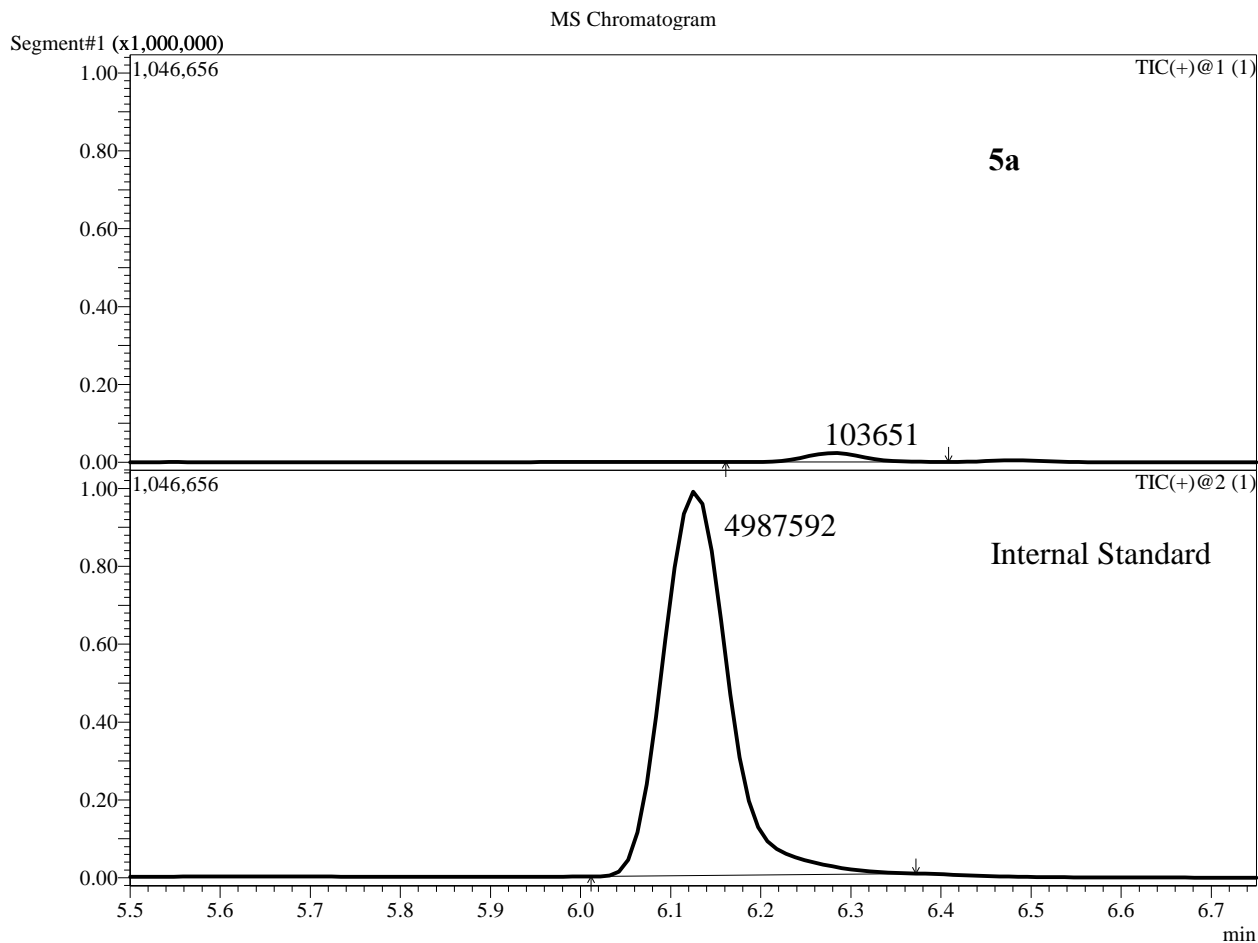

MASS Peak Table TIC

| Peak# | Ret. Time | m/z | Area    | Compound Name | Event# |
|-------|-----------|-----|---------|---------------|--------|
| 1     | 6.282     | TIC | 103651  |               | 1-1    |
| 2     | 6.127     | TIC | 4987592 |               | 1-2    |

Sample Information

Date Acquired : 3/31/2016 12:19:29 PM  
 Sample ID : 2h poA Plasma  
 Injection Volume : 10  
 Data File : 41.lcd  
 Method File : V1.lcm

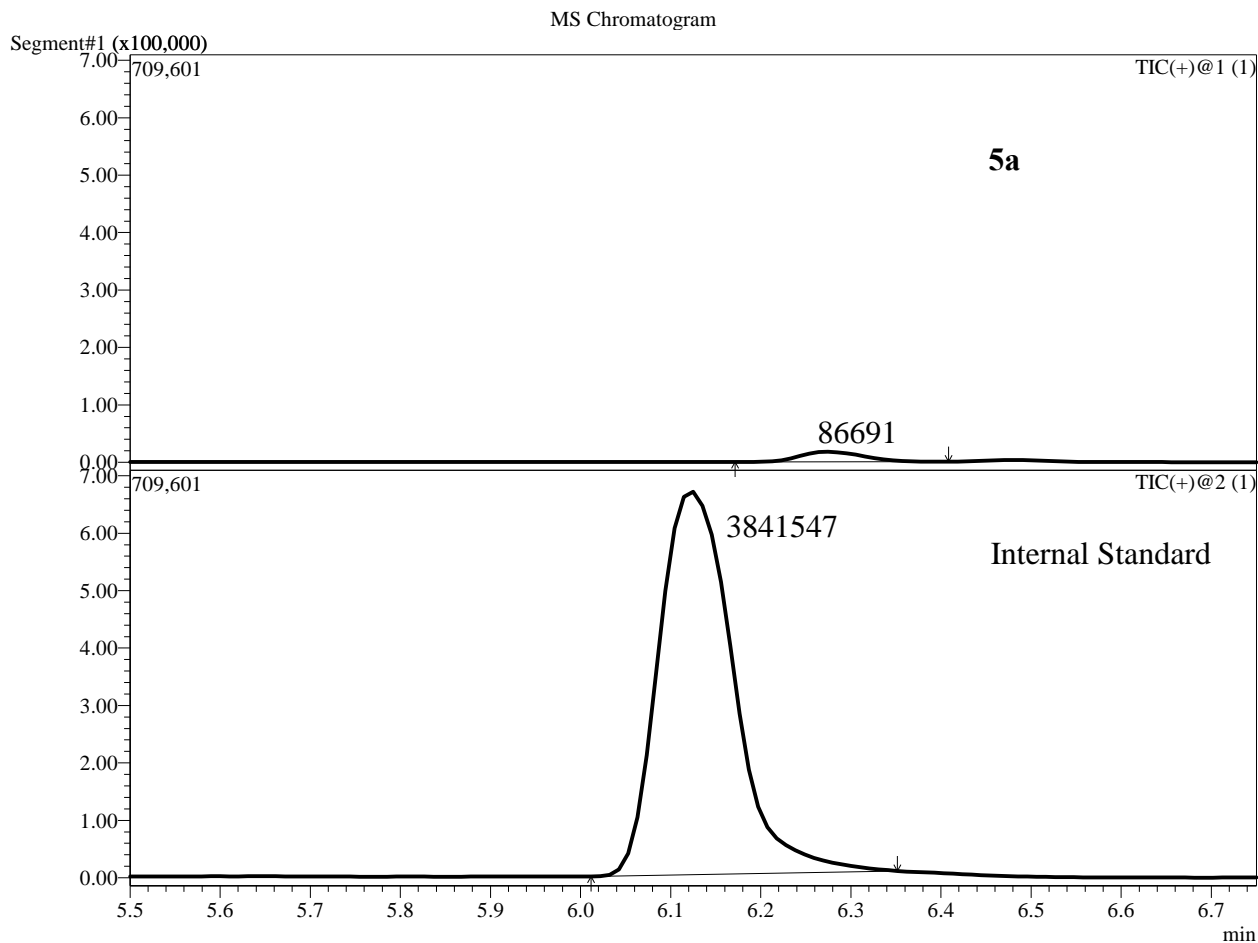

MASS Peak Table TIC

| Peak# | Ret. Time | m/z | Area    | Compound Name | Event# |
|-------|-----------|-----|---------|---------------|--------|
| 1     | 6.274     | TIC | 86691   |               | 1-1    |
| 2     | 6.123     | TIC | 3841547 |               | 1-2    |

Date Acquired : 3/30/2016 8:21:00 PM  
 Sample ID : 2h poB Brain  
 Injection Volume : 10  
 Data File : 18.lcd  
 Method File : V1.lcm

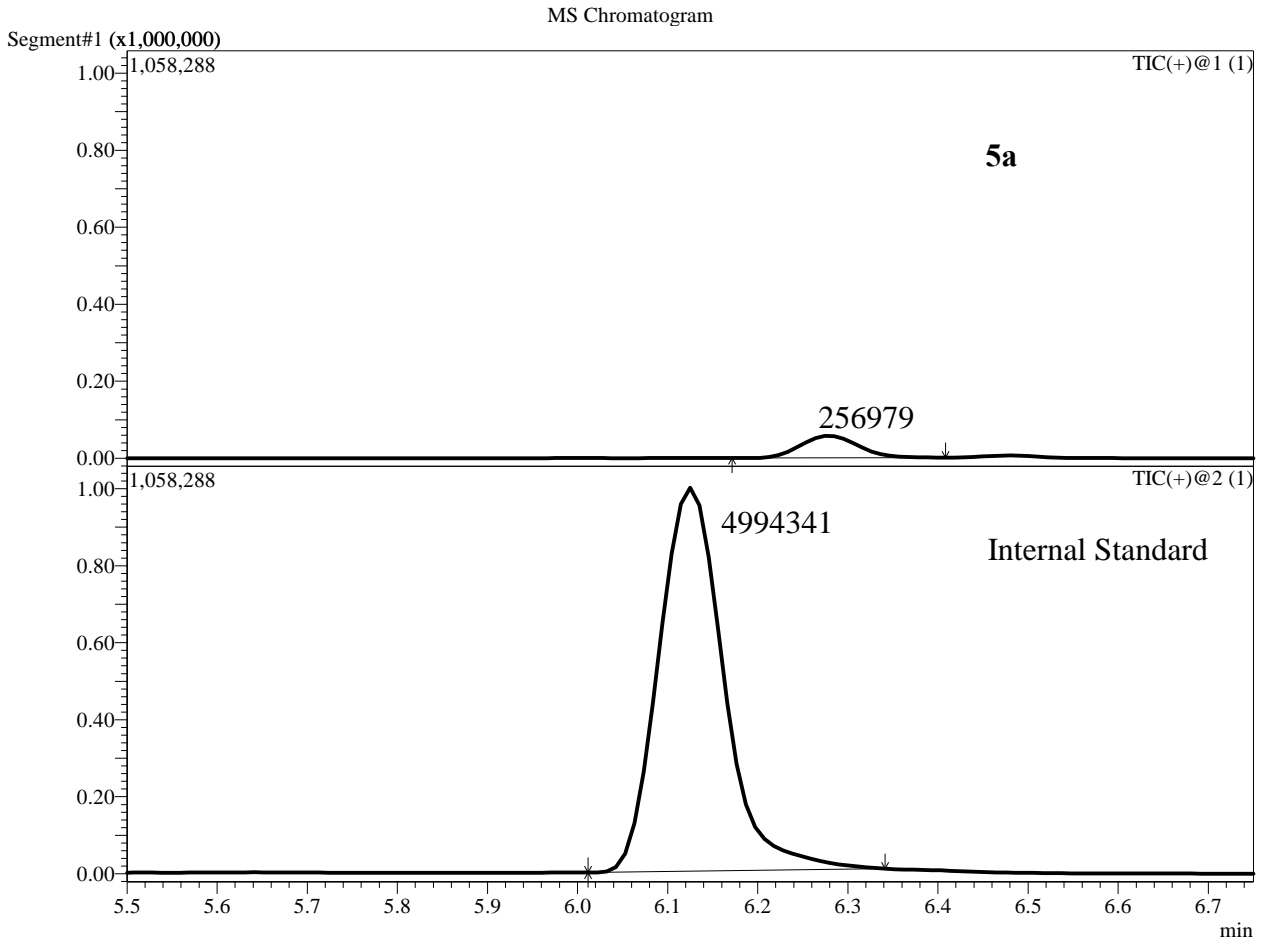

MASS Peak Table TIC

| Peak# | Ret. Time | m/z | Area    | Compound Name | Event# |
|-------|-----------|-----|---------|---------------|--------|
| 1     | 6.279     | TIC | 256979  |               | 1-1    |
| 2     | 6.125     | TIC | 4994341 |               | 1-2    |

Sample Information

Date Acquired : 3/31/2016 12:30:00 PM  
 Sample ID : 2h poB Plasma  
 Injection Volume : 10  
 Data File : 42.lcd  
 Method File : V1.lcm

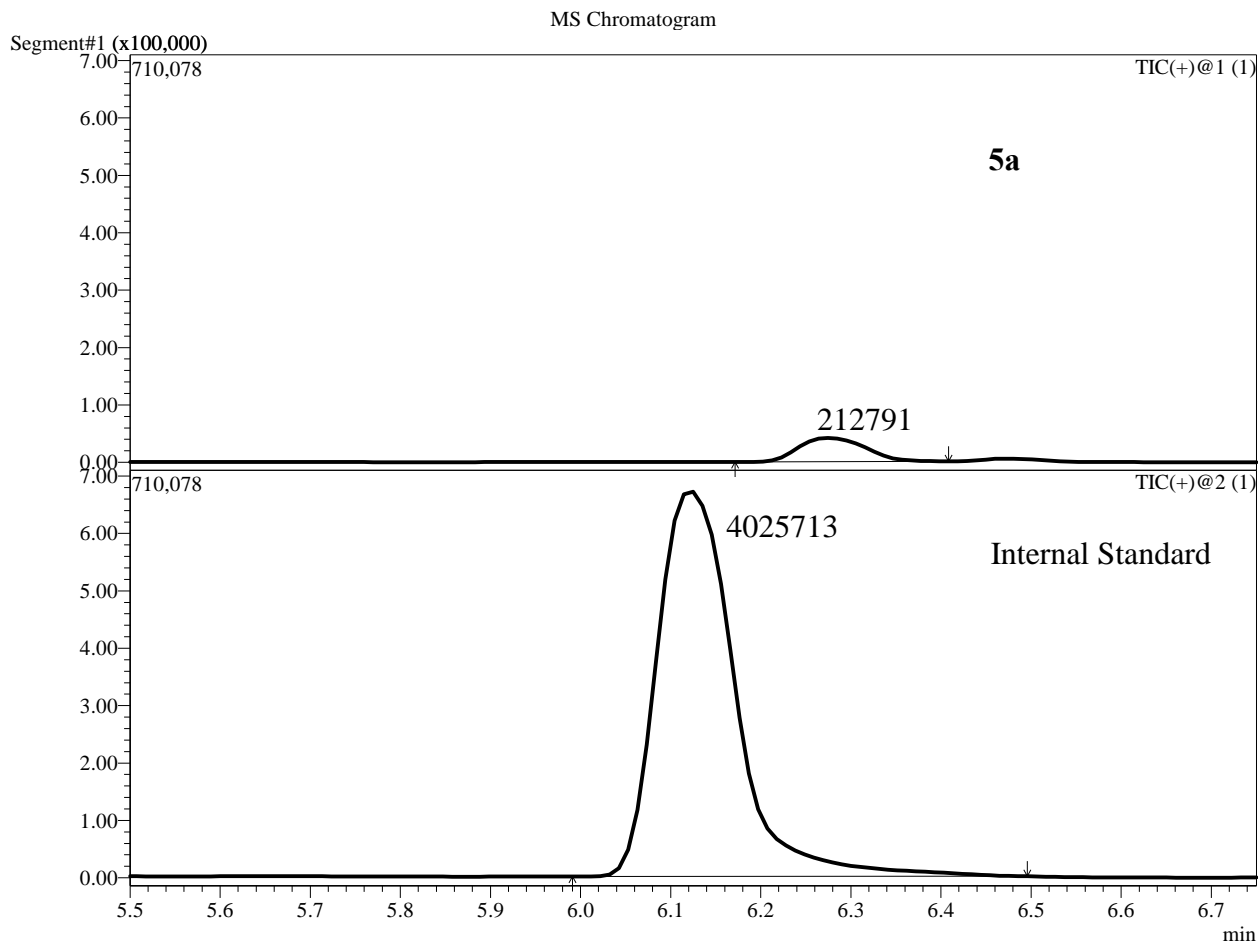

MASS Peak Table TIC

| Peak# | Ret. Time | m/z | Area    | Compound Name | Event# |
|-------|-----------|-----|---------|---------------|--------|
| 1     | 6.274     | TIC | 212791  |               | 1-1    |
| 2     | 6.122     | TIC | 4025713 |               | 1-2    |

Sample Information

Date Acquired : 3/30/2016 8:31:29 PM  
 Sample ID : 2h poC Brain  
 Injection Volume : 10  
 Data File : 19.lcd  
 Method File : V1.lcm

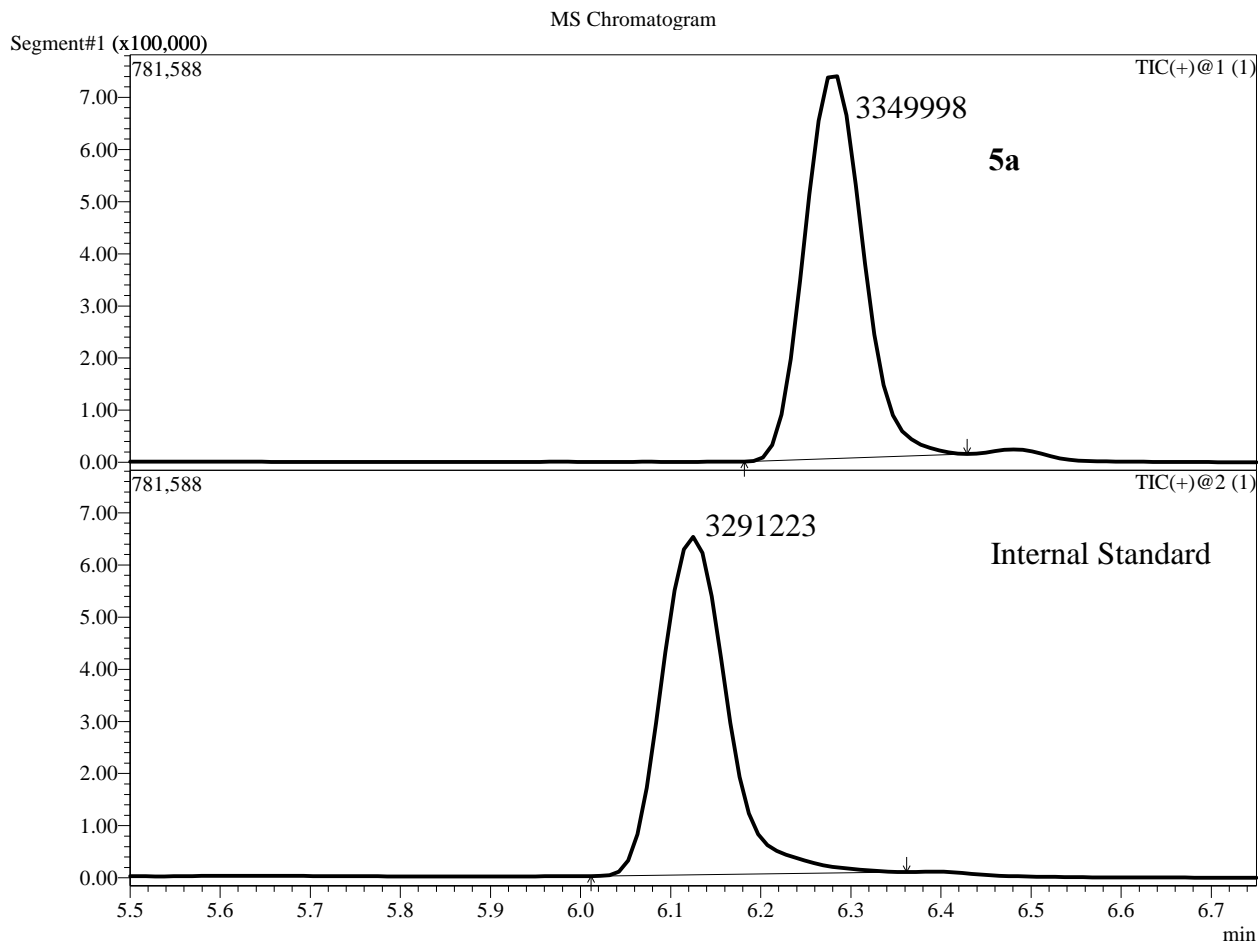

MASS Peak Table TIC

| Peak# | Ret. Time | m/z | Area    | Compound Name | Event# |
|-------|-----------|-----|---------|---------------|--------|
| 1     | 6.280     | TIC | 3349998 |               | 1-1    |
| 2     | 6.125     | TIC | 3291223 |               | 1-2    |

Date Acquired : 3/31/2016 12:40:31 PM  
 Sample ID : 2h poC Plasma  
 Injection Volume : 10  
 Data File : 43.lcd  
 Method File : V1.lcm

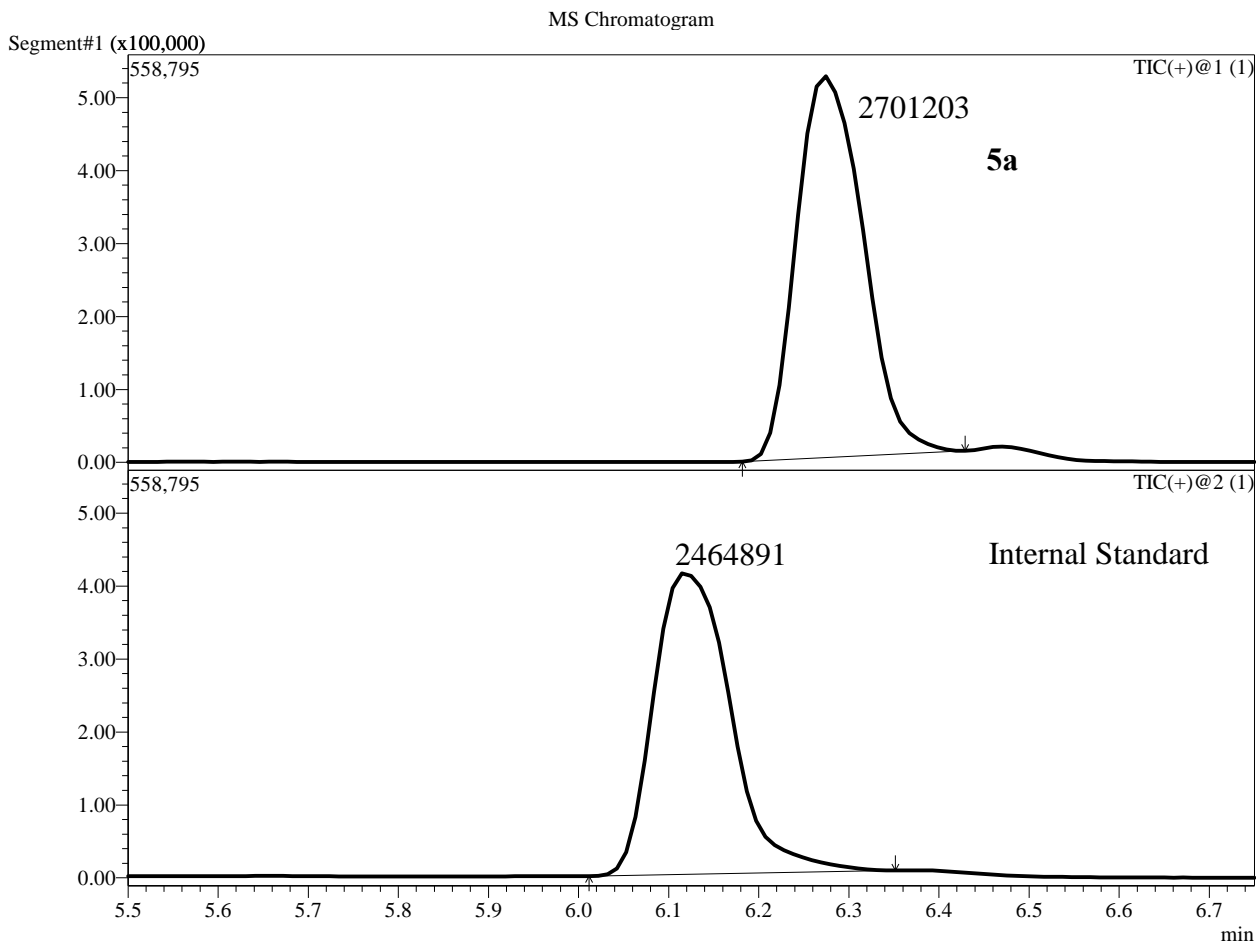

MASS Peak Table TIC

| Peak# | Ret. Time | m/z | Area    | Compound Name | Event# |
|-------|-----------|-----|---------|---------------|--------|
| 1     | 6.273     | TIC | 2701203 |               | 1-1    |
| 2     | 6.119     | TIC | 2464891 |               | 1-2    |



**Sample Information**  
 Date Acquired : 3/30/2016 8:41:59 PM  
 Sample ID : 2h poD Brain  
 Injection Volume : 10  
 Data File : 20.lcd  
 Method File : V1.lcm

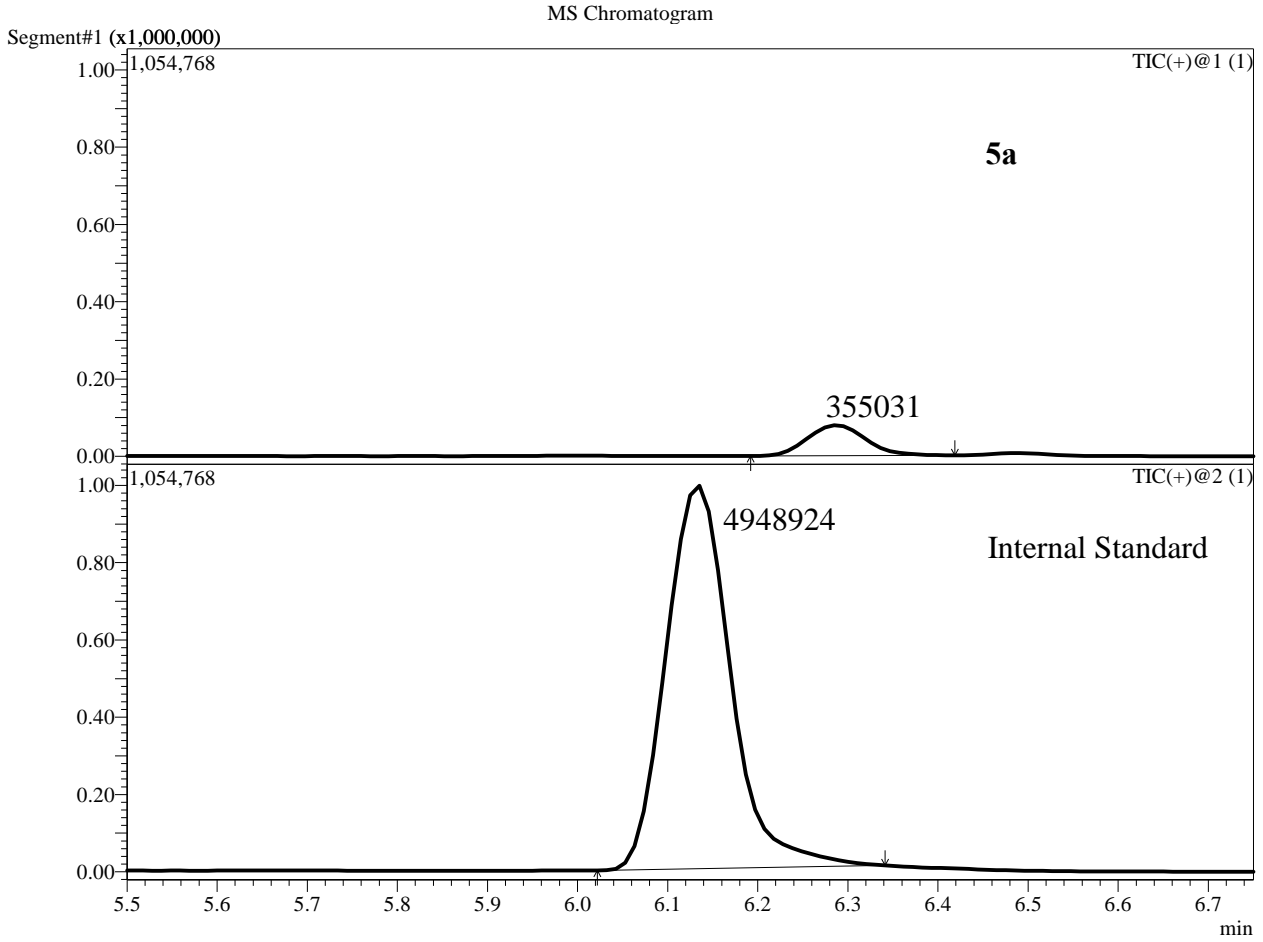

MASS Peak Table TIC

| Peak# | Ret. Time | m/z | Area    | Compound Name | Event# |
|-------|-----------|-----|---------|---------------|--------|
| 1     | 6.287     | TIC | 355031  |               | 1-1    |
| 2     | 6.133     | TIC | 4948924 |               | 1-2    |

**Sample Information**  
 Date Acquired : 3/31/2016 12:51:01 PM  
 Sample ID : 2h poD Plasma  
 Injection Volume : 10  
 Data File : 44.lcd  
 Method File : V1.lcm

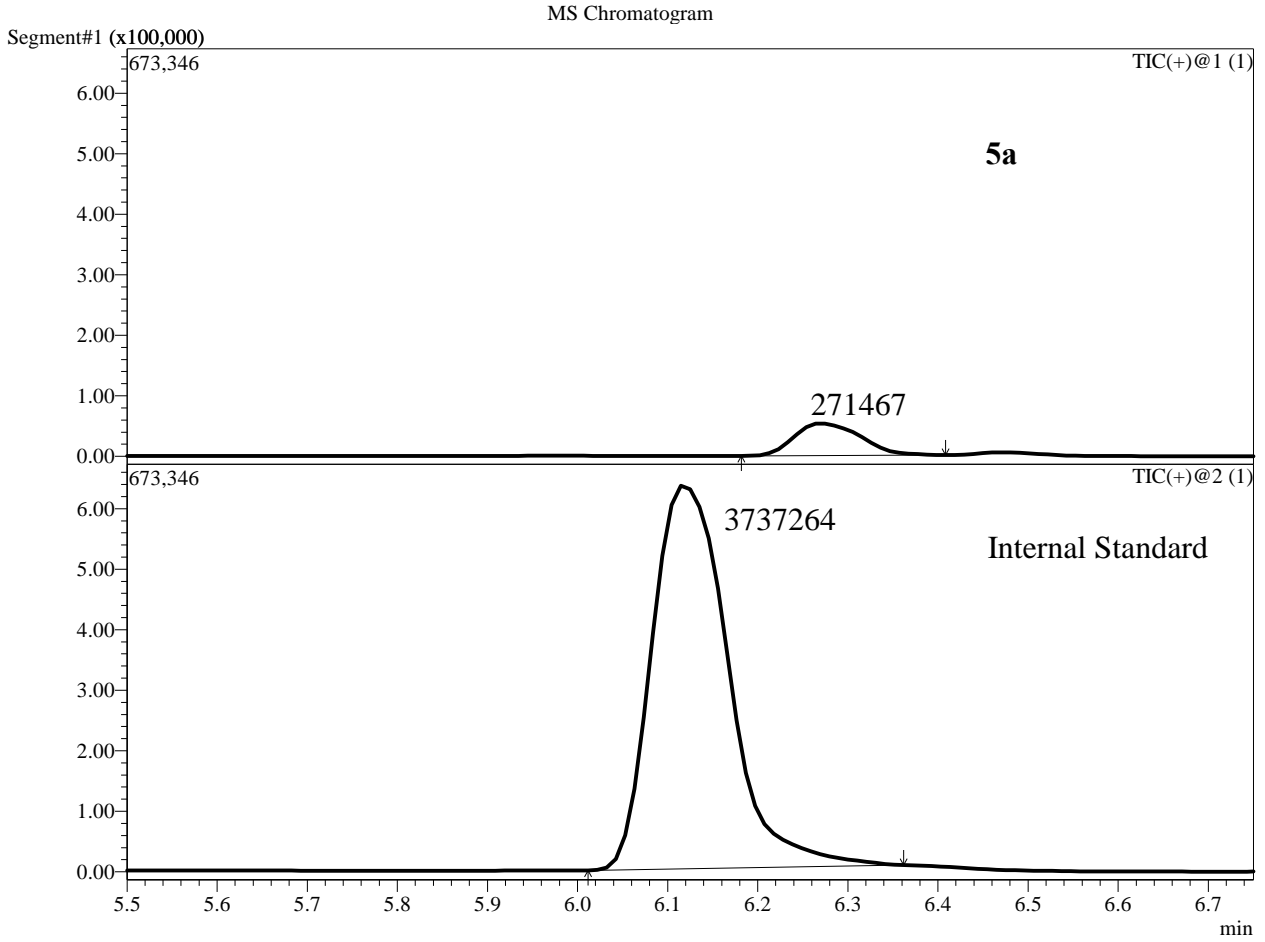

MASS Peak Table TIC

| Peak# | Ret. Time | m/z | Area    | Compound Name | Event# |
|-------|-----------|-----|---------|---------------|--------|
| 1     | 6.270     | TIC | 271467  |               | 1-1    |
| 2     | 6.118     | TIC | 3737264 |               | 1-2    |

Date Acquired : 3/30/2016 8:52:30 PM  
 Sample ID : 12h poA Brain  
 Injection Volume : 10  
 Data File : 21.lcd  
 Method File : V1.lcm

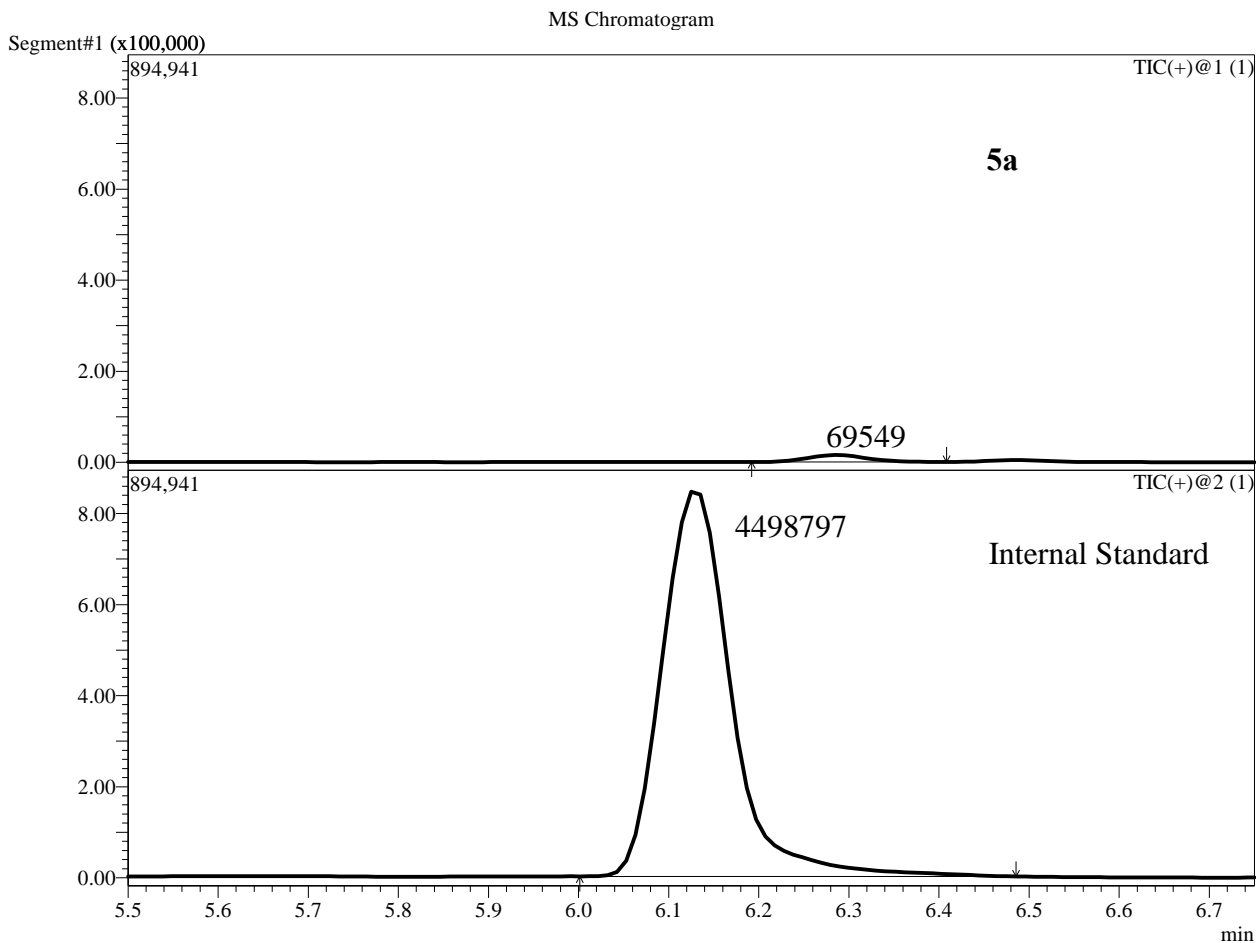

MASS Peak Table TIC

| Peak# | Ret. Time | m/z | Area    | Compound Name | Event# |
|-------|-----------|-----|---------|---------------|--------|
| 1     | 6.286     | TIC | 69549   |               | 1-1    |
| 2     | 6.129     | TIC | 4498797 |               | 1-2    |

Date Acquired : 3/31/2016 1:01:31 PM  
 Sample ID : 12h poA Plasma  
 Injection Volume : 10  
 Data File : 45.lcd  
 Method File : V1.lcm

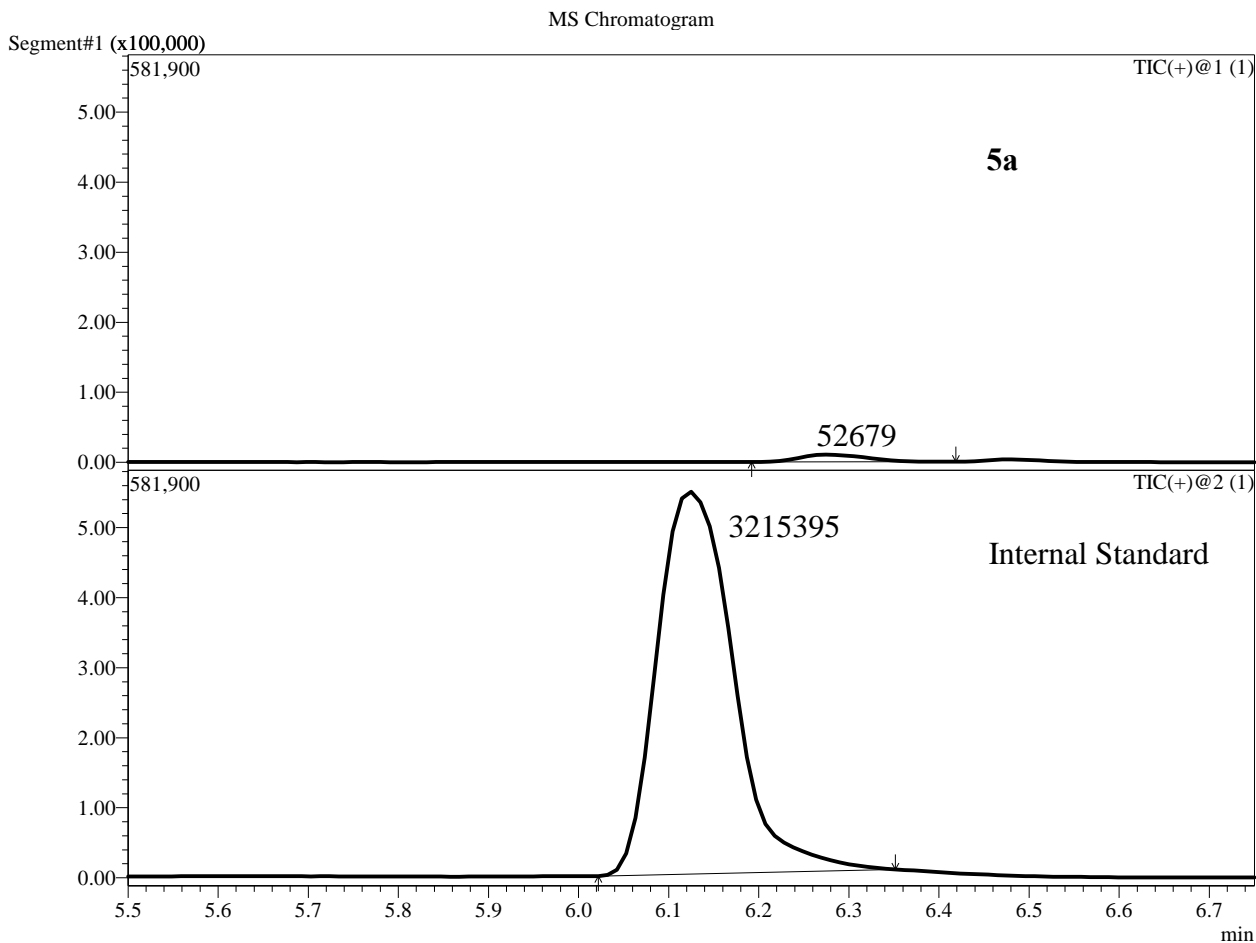

MASS Peak Table TIC

| Peak# | Ret. Time | m/z | Area    | Compound Name | Event# |
|-------|-----------|-----|---------|---------------|--------|
| 1     | 6.276     | TIC | 52679   |               | 1-1    |
| 2     | 6.124     | TIC | 3215395 |               | 1-2    |

Date Acquired : 3/30/2016 9:03:00 PM  
 Sample ID : 12h poB Brain  
 Injection Volume : 10  
 Data File : 22.lcd  
 Method File : V1.lcm

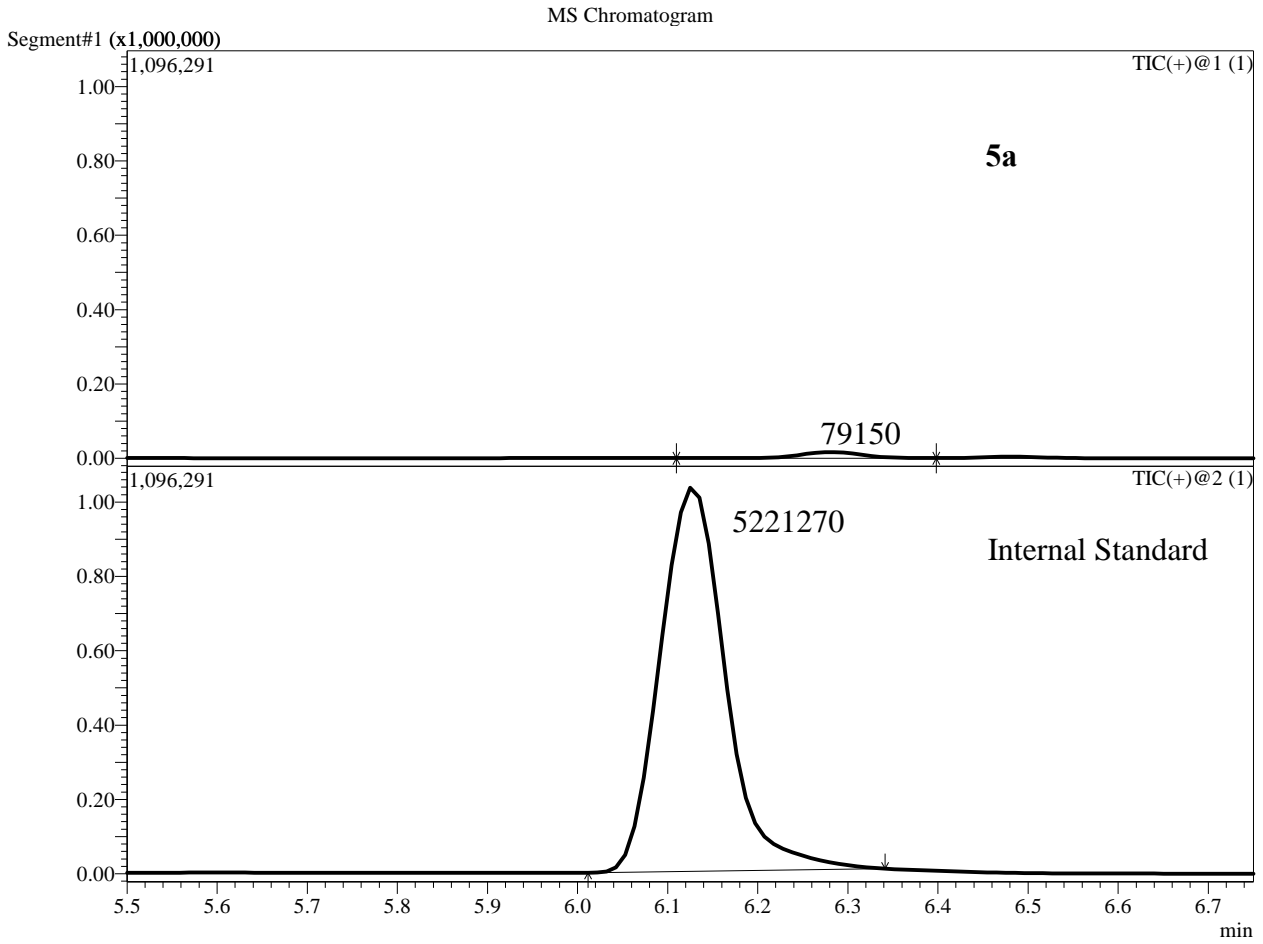

MASS Peak Table TIC

| Peak# | Ret. Time | m/z | Area    | Compound Name | Event# |
|-------|-----------|-----|---------|---------------|--------|
| 1     | 6.270     | TIC | 79150   |               | 1-1    |
| 2     | 6.127     | TIC | 5221270 |               | 1-2    |

Sample Information

Date Acquired : 3/31/2016 1:12:01 PM  
 Sample ID : 12h poB Plasma  
 Injection Volume : 10  
 Data File : 46.lcd  
 Method File : V1.lcm

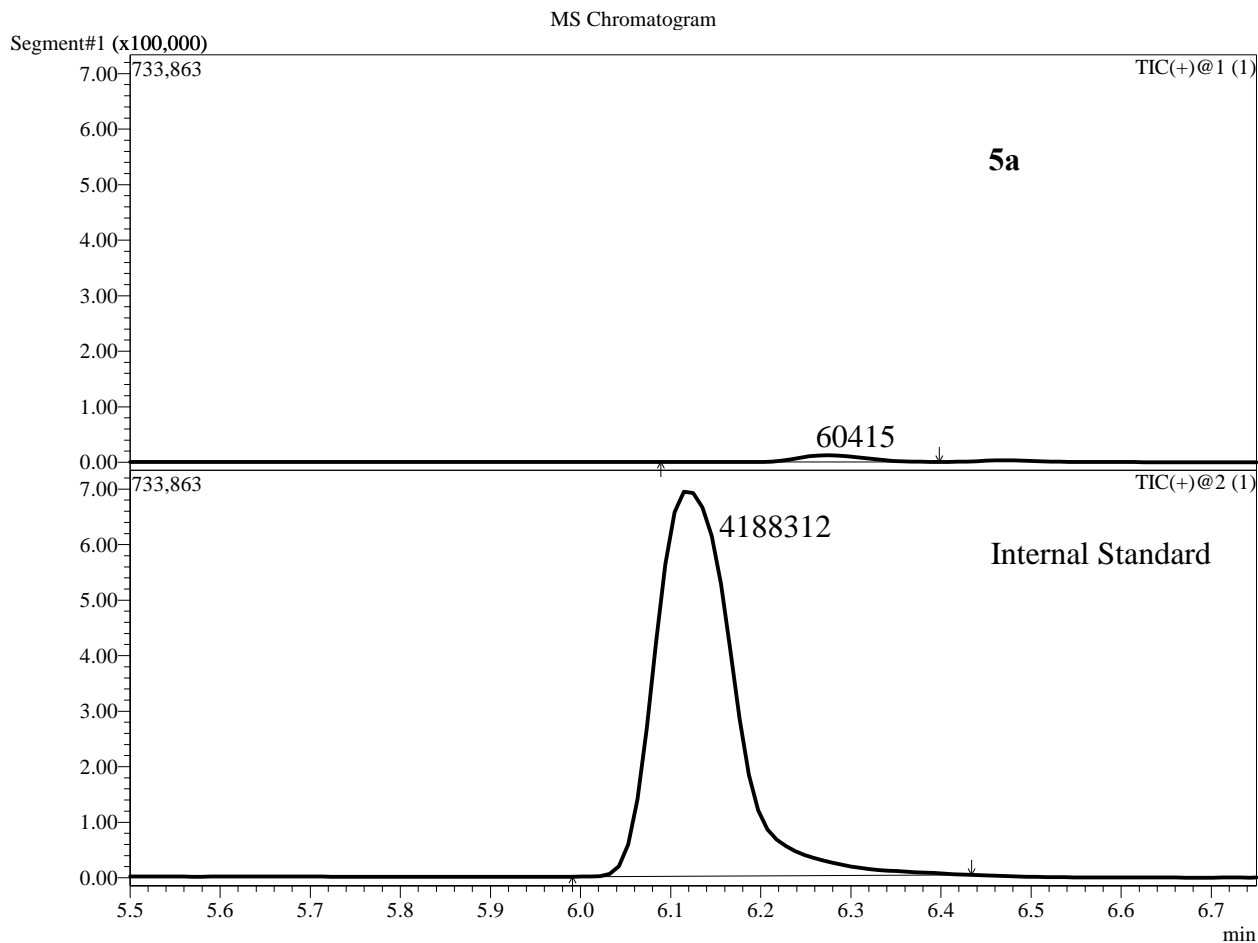

MASS Peak Table TIC

| Peak# | Ret. Time | m/z | Area    | Compound Name | Event# |
|-------|-----------|-----|---------|---------------|--------|
| 1     | 6.272     | TIC | 60415   |               | 1-1    |
| 2     | 6.119     | TIC | 4188312 |               | 1-2    |

Sample Information

Date Acquired : 3/30/2016 9:13:30 PM  
 Sample ID : 12h poC Brain  
 Injection Volume : 10  
 Data File : 23.lcd  
 Method File : V1.lcm

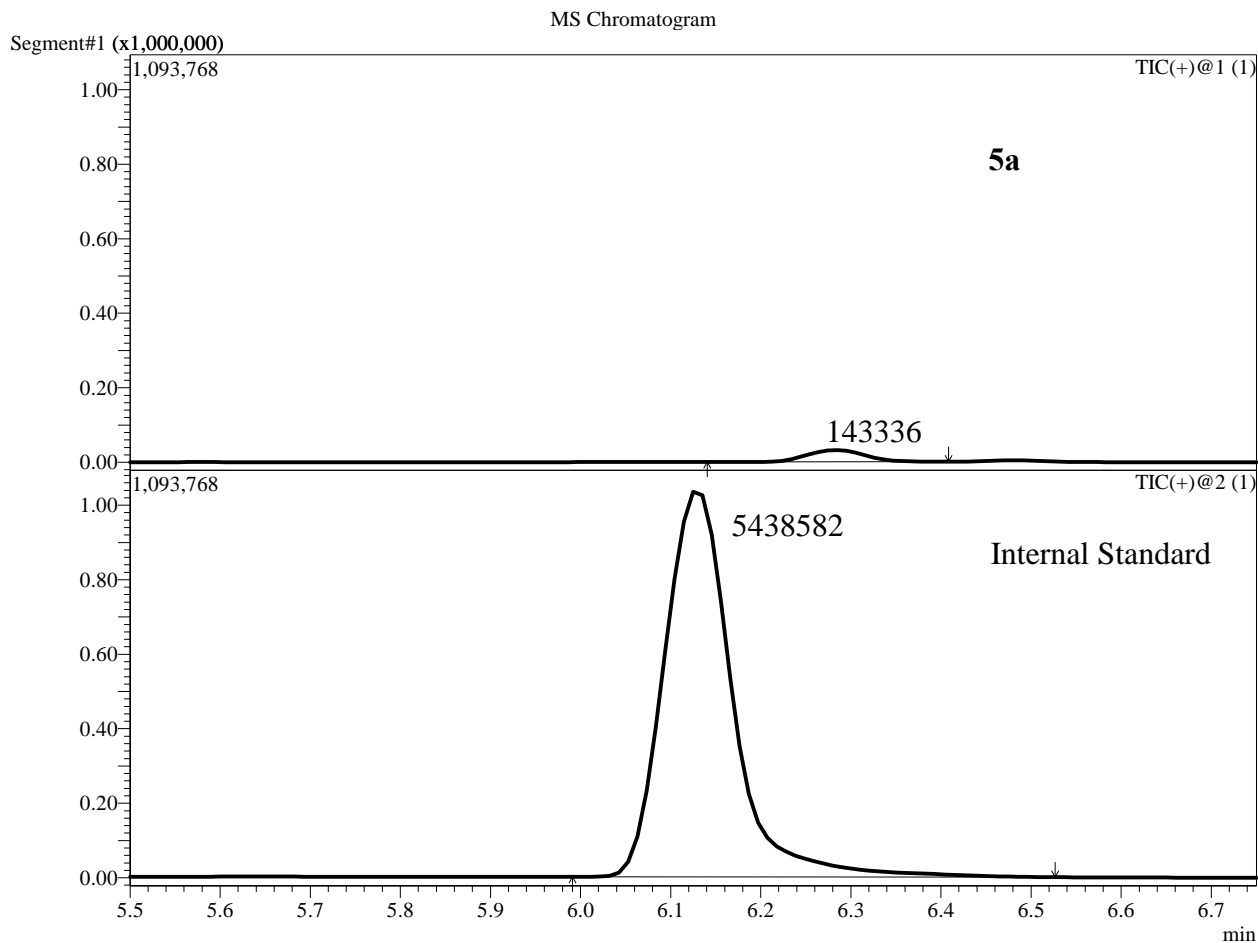

MASS Peak Table TIC

| Peak# | Ret. Time | m/z | Area    | Compound Name | Event# |
|-------|-----------|-----|---------|---------------|--------|
| 1     | 6.283     | TIC | 143336  |               | 1-1    |
| 2     | 6.129     | TIC | 5438582 |               | 1-2    |

Sample Information

Date Acquired : 3/31/2016 1:22:32 PM  
 Sample ID : 12h poC Plasma  
 Injection Volume : 10  
 Data File : 47.lcd  
 Method File : V1.lcm

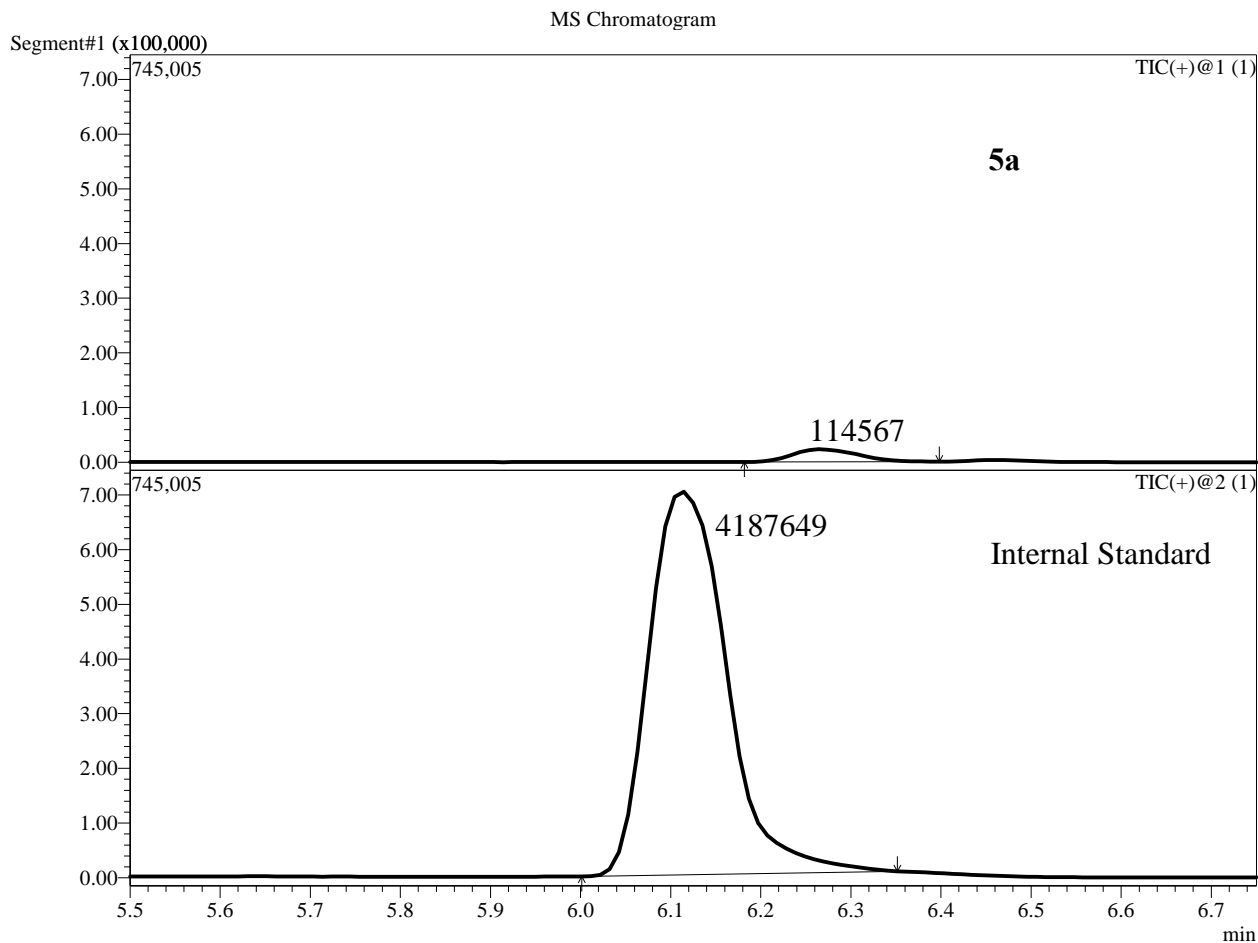

MASS Peak Table TIC

| Peak# | Ret. Time | m/z | Area    | Compound Name | Event# |
|-------|-----------|-----|---------|---------------|--------|
| 1     | 6.265     | TIC | 114567  |               | 1-1    |
| 2     | 6.113     | TIC | 4187649 |               | 1-2    |



Sample Information

Date Acquired : 3/31/2016 1:33:04 PM  
 Sample ID : 12h poD Brain  
 Injection Volume : 10  
 Data File : 48.lcd  
 Method File : V1.lcm

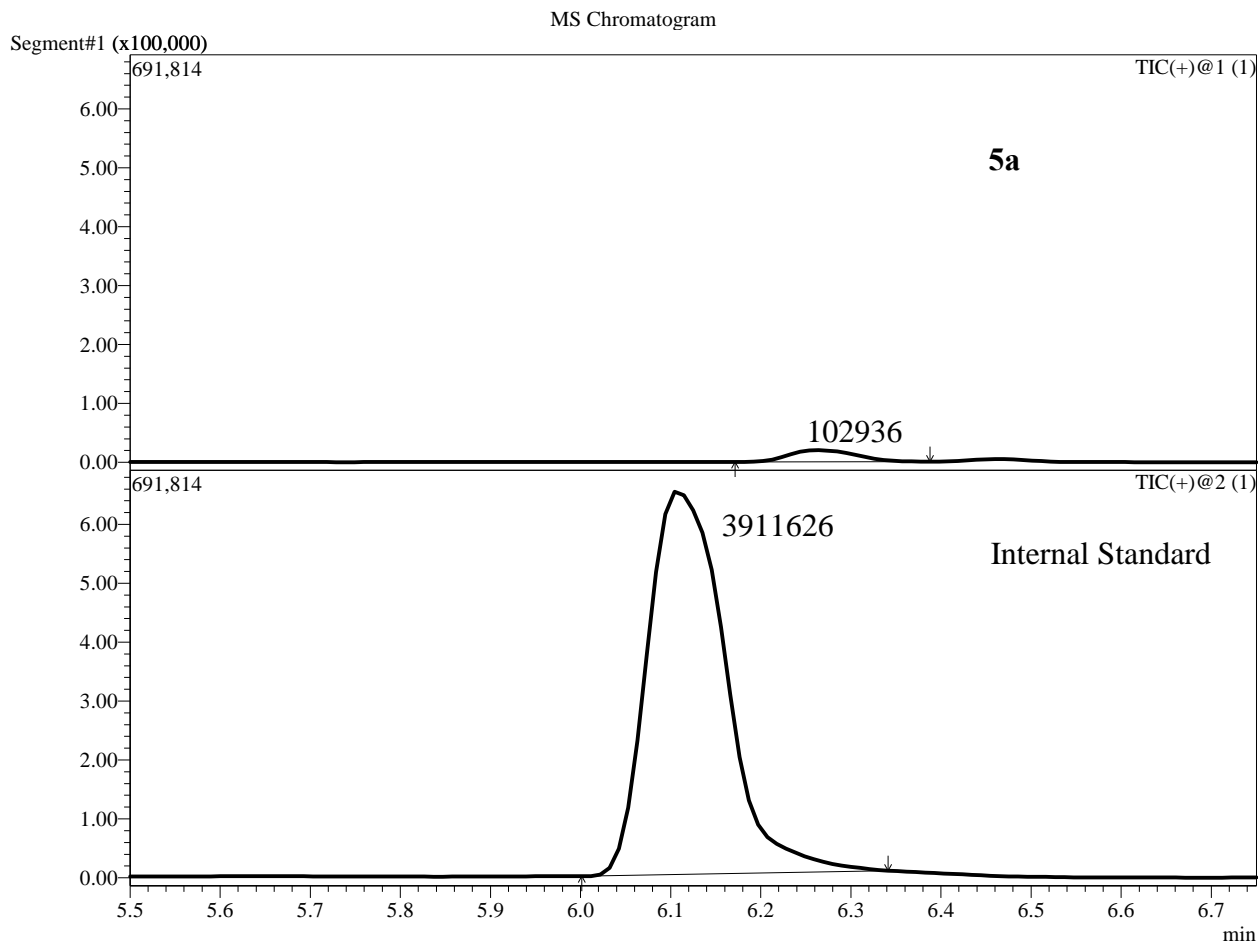

MASS Peak Table TIC

| Peak# | Ret. Time | m/z | Area    | Compound Name | Event# |
|-------|-----------|-----|---------|---------------|--------|
| 1     | 6.262     | TIC | 102936  |               | 1-1    |
| 2     | 6.108     | TIC | 3911626 |               | 1-2    |

Date Acquired : 3/30/2016 9:24:00 PM  
 Sample ID : 12h poD Plasma  
 Injection Volume : 10  
 Data File : 24.lcd  
 Method File : V1.lcm

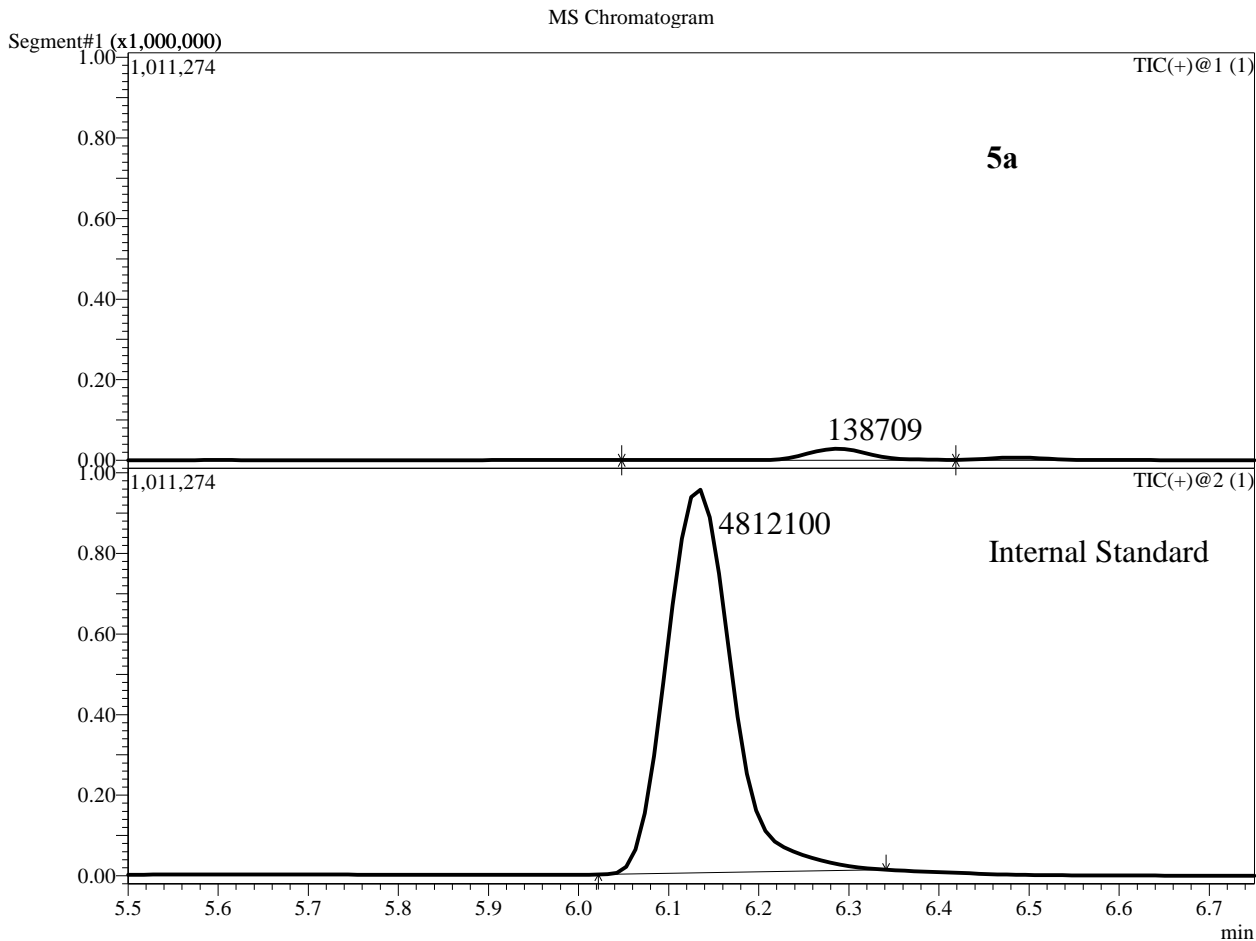

MASS Peak Table TIC

| Peak# | Ret. Time | m/z | Area    | Compound Name | Event# |
|-------|-----------|-----|---------|---------------|--------|
| 1     | 6.287     | TIC | 138709  |               | 1-1    |
| 2     | 6.132     | TIC | 4812100 |               | 1-2    |

# Supplemental Crystallographic Data

## Furoxans (oxadiazole-4N-oxides) with Attenuated Reactivity are Neuroprotective, Cross the Blood Brain Barrier, and Improve Passive Avoidance Memory

*Austin Horton<sup>†</sup>, Kevin Nash<sup>‡</sup>, Ethel Tackie-Yarboi<sup>†</sup>, Alexander Kostrevski<sup>†</sup>, Adam Novak<sup>†</sup>,  
Aparna Raghavan<sup>†</sup>, Jatin Tulsulkar<sup>†</sup>, Qasim Alhadidi<sup>†</sup>, Nathan Wamer<sup>†</sup>, Bryn Langenderfer<sup>†</sup>,  
Kalee Royster<sup>†</sup>, Maxwell Ducharme<sup>†</sup>, Katelyn Hagood<sup>†</sup>, Megan Post<sup>†</sup>, Zahoor A. Shah<sup>†</sup>, Isaac T.  
Schiefer<sup>†\*</sup>*

<sup>†</sup>Department of Medicinal and Biological Chemistry, College of Pharmacy and Pharmaceutical Sciences, University of Toledo, Toledo, OH, 43614

<sup>‡</sup>Department of Pharmacology and Experimental Therapeutics, College of Pharmacy and Pharmaceutical Sciences, University of Toledo, Toledo, OH 43614

## List of Contents

- S3 Crystal Structure Report for **5a**
- S4 Sample and Crystal Data (Table 1), Data Collection and structure refinement (Table 2)
- S5 Atomic coordinates and equivalent isotropic atomic displacement parameters (Table 3)
- S6 Bond lengths (Table 4)
- S7 Bond angles (Table 5)
- S8 Anisotropic atomic displacement parameters (Table 6)
- S9 Hydrogen atomic coordinates and isotropic atomic displacement parameters (Table 7)

# Crystal Structure Report for 5a (IS141\_3)

A clear colorless irregular prism-like specimen of  $C_{15}H_{18}FN_3O_2$ , approximate dimensions 0.058 mm x 0.156 mm x 0.270 mm, was used for the X-ray crystallographic analysis. The X-ray intensity data were measured.

The integration of the data using a monoclinic unit cell yielded a total of 26380 reflections to a maximum  $\theta$  angle of  $33.11^\circ$  (0.65 Å resolution), of which 5531 were independent (average redundancy 4.769, completeness = 95.1%,  $R_{\text{int}} = 4.72\%$ ,  $R_{\text{sig}} = 4.02\%$ ) and 4041 (73.06%) were greater than  $2\sigma(F^2)$ . The final cell constants of  $a = 11.3374(14)$  Å,  $b = 7.2234(9)$  Å,  $c = 18.825(2)$  Å,  $\beta = 97.601(2)^\circ$ , volume =  $1528.1(3)$  Å<sup>3</sup>, are based upon the refinement of the XYZ-centroids of reflections above  $20\sigma(I)$ .

The final anisotropic full-matrix least-squares refinement on  $F^2$  with 255 variables converged at  $R1 = 5.17\%$ , for the observed data and  $wR2 = 14.18\%$  for all data. The methyl group (C15) is disordered. The occupancy of the C15 atoms was refined to be 50% and then fixed. They are refined with isotropic atomic displacement parameters; the bonded hydrogen atoms were calculated on idealized hydrogens and refined as riding atoms. The goodness-of-fit was 1.012. The largest peak in the final difference electron density synthesis was  $0.487 e^-/\text{Å}^3$  and the largest hole was  $-0.540 e^-/\text{Å}^3$  with an RMS deviation of  $0.058 e^-/\text{Å}^3$ . On the basis of the final model, the calculated density was  $1.266 \text{ g/cm}^3$  and  $F(000)$ , 616  $e^-$ .

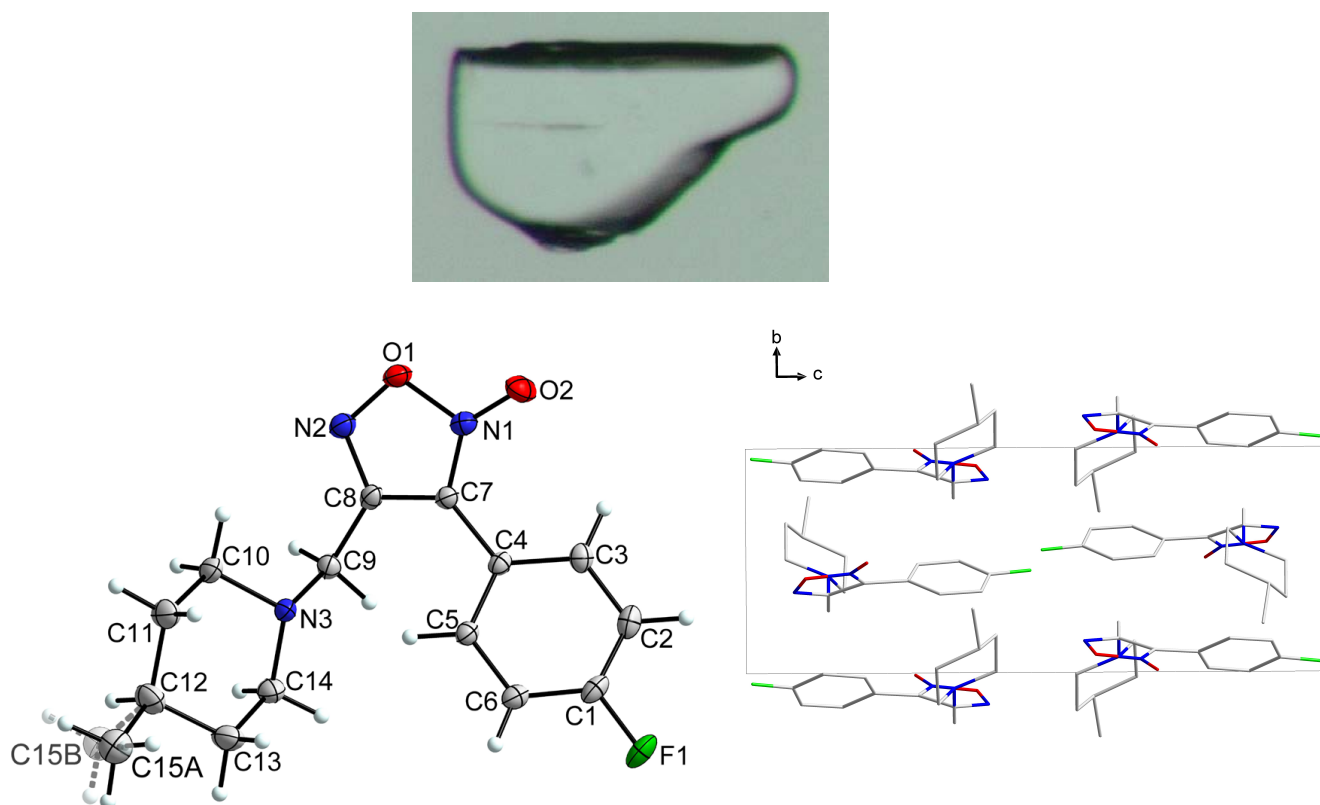

**Table 1. Sample and crystal data for IS141\_3.**

|                               |                                                                |                |
|-------------------------------|----------------------------------------------------------------|----------------|
| <b>Chemical formula</b>       | C <sub>15</sub> H <sub>18</sub> FN <sub>3</sub> O <sub>2</sub> |                |
| <b>Formula weight</b>         | 291.32 g/mol                                                   |                |
| <b>Temperature</b>            | 100(2) K                                                       |                |
| <b>Wavelength</b>             | 0.71073 Å                                                      |                |
| <b>Crystal size</b>           | 0.058 x 0.156 x 0.270 mm                                       |                |
| <b>Crystal habit</b>          | clear colorless irregular prism                                |                |
| <b>Crystal system</b>         | monoclinic                                                     |                |
| <b>Space group</b>            | P 1 21/c 1                                                     |                |
| <b>Unit cell dimensions</b>   | a = 11.3374(14) Å                                              | α = 90°        |
|                               | b = 7.2234(9) Å                                                | β = 97.601(2)° |
|                               | c = 18.825(2) Å                                                | γ = 90°        |
| <b>Volume</b>                 | 1528.1(3) Å <sup>3</sup>                                       |                |
| <b>Z</b>                      | 4                                                              |                |
| <b>Density (calculated)</b>   | 1.266 g/cm <sup>3</sup>                                        |                |
| <b>Absorption coefficient</b> | 0.094 mm <sup>-1</sup>                                         |                |
| <b>F(000)</b>                 | 616                                                            |                |

**Table 2. Data collection and structure refinement for IS141\_3.**

|                                         |                                                                                                                                                               |                           |
|-----------------------------------------|---------------------------------------------------------------------------------------------------------------------------------------------------------------|---------------------------|
| <b>Theta range for data collection</b>  | 2.18 to 33.11°                                                                                                                                                |                           |
| <b>Index ranges</b>                     | -16<=h<=16, -10<=k<=10, -28<=l<=28                                                                                                                            |                           |
| <b>Reflections collected</b>            | 26380                                                                                                                                                         |                           |
| <b>Independent reflections</b>          | 5531 [R(int) = 0.0472]                                                                                                                                        |                           |
| <b>Refinement method</b>                | Full-matrix least-squares on F <sup>2</sup>                                                                                                                   |                           |
| <b>Refinement program</b>               | SHELXL-2014/7 (Sheldrick, 2014)                                                                                                                               |                           |
| <b>Function minimized</b>               | Σ w(F <sub>o</sub> <sup>2</sup> - F <sub>c</sub> <sup>2</sup> ) <sup>2</sup>                                                                                  |                           |
| <b>Data / restraints / parameters</b>   | 5531 / 0 / 255                                                                                                                                                |                           |
| <b>Goodness-of-fit on F<sup>2</sup></b> | 1.012                                                                                                                                                         |                           |
| <b>Final R indices</b>                  | 4041 data; I>2σ(I)                                                                                                                                            | R1 = 0.0517, wR2 = 0.1252 |
|                                         | all data                                                                                                                                                      | R1 = 0.0794, wR2 = 0.1418 |
| <b>Weighting scheme</b>                 | w=1/[σ <sup>2</sup> (F <sub>o</sub> <sup>2</sup> )+(0.0662P) <sup>2</sup> +0.6040P]<br>where P=(F <sub>o</sub> <sup>2</sup> +2F <sub>c</sub> <sup>2</sup> )/3 |                           |
| <b>Largest diff. peak and hole</b>      | 0.487 and -0.540 eÅ <sup>-3</sup>                                                                                                                             |                           |
| <b>R.M.S. deviation from mean</b>       | 0.058 eÅ <sup>-3</sup>                                                                                                                                        |                           |

**Table 3. Atomic coordinates and equivalent isotropic atomic displacement parameters ( $\text{\AA}^2$ ) for IS141\_3.**

U(eq) is defined as one third of the trace of the orthogonalized  $U_{ij}$  tensor.

|      | <b>x/a</b>  | <b>y/b</b>  | <b>z/c</b> | <b>U(eq)</b> |
|------|-------------|-------------|------------|--------------|
| F1   | 0.31894(8)  | 0.54560(13) | 0.51068(4) | 0.0328(2)    |
| O1   | 0.64913(8)  | 0.57881(13) | 0.89702(5) | 0.02322(19)  |
| O2   | 0.72029(8)  | 0.50985(14) | 0.79156(5) | 0.0279(2)    |
| N1   | 0.63260(9)  | 0.55790(15) | 0.81989(6) | 0.0200(2)    |
| N2   | 0.54205(10) | 0.63937(16) | 0.91653(6) | 0.0222(2)    |
| N3   | 0.25619(9)  | 0.56969(15) | 0.85780(5) | 0.0187(2)    |
| C1   | 0.36877(12) | 0.56305(18) | 0.58001(6) | 0.0224(2)    |
| C2   | 0.48134(12) | 0.63739(18) | 0.59438(7) | 0.0233(2)    |
| C3   | 0.53301(11) | 0.64905(17) | 0.66571(6) | 0.0202(2)    |
| C4   | 0.46964(10) | 0.58888(16) | 0.72049(6) | 0.0165(2)    |
| C5   | 0.35444(10) | 0.51745(16) | 0.70360(6) | 0.0177(2)    |
| C6   | 0.30356(11) | 0.50271(17) | 0.63257(6) | 0.0204(2)    |
| C7   | 0.52028(10) | 0.59930(16) | 0.79628(6) | 0.0166(2)    |
| C8   | 0.46649(10) | 0.65105(16) | 0.85770(6) | 0.0179(2)    |
| C9   | 0.34215(11) | 0.72097(17) | 0.85802(6) | 0.0195(2)    |
| C10  | 0.25910(12) | 0.4930(2)   | 0.93044(7) | 0.0241(3)    |
| C11  | 0.17264(13) | 0.3330(2)   | 0.93051(8) | 0.0300(3)    |
| C12  | 0.04613(13) | 0.3927(2)   | 0.90175(9) | 0.0335(3)    |
| C13  | 0.04648(13) | 0.4804(2)   | 0.82762(8) | 0.0331(3)    |
| C14  | 0.13635(11) | 0.6371(2)   | 0.83078(7) | 0.0256(3)    |
| C15A | 0.9623(4)   | 0.2173(6)   | 0.8909(2)  | 0.0348(8)    |
| C15B | 0.9542(3)   | 0.2489(5)   | 0.9067(2)  | 0.0344(8)    |

**Table 4. Bond lengths (Å) for IS141\_3.**

|           |            |           |            |
|-----------|------------|-----------|------------|
| F1-C1     | 1.3577(14) | O1-N2     | 1.3849(14) |
| O1-N1     | 1.4470(13) | O2-N1     | 1.2384(13) |
| N1-C7     | 1.3263(15) | N2-C8     | 1.3102(15) |
| N3-C9     | 1.4639(16) | N3-C14    | 1.4692(16) |
| N3-C10    | 1.4716(15) | C1-C2     | 1.3780(19) |
| C1-C6     | 1.3817(18) | C2-C3     | 1.3947(17) |
| C2-H2     | 0.976(19)  | C3-C4     | 1.4016(16) |
| C3-H3     | 0.993(16)  | C4-C5     | 1.4011(16) |
| C4-C7     | 1.4676(15) | C5-C6     | 1.3885(16) |
| C5-H5     | 0.985(17)  | C6-H6     | 0.947(18)  |
| C7-C8     | 1.4266(16) | C8-C9     | 1.4981(17) |
| C9-H9A    | 0.934(17)  | C9-H9B    | 0.991(15)  |
| C10-C11   | 1.5158(19) | C10-H10A  | 1.027(18)  |
| C10-H10B  | 1.010(18)  | C11-C12   | 1.527(2)   |
| C11-H11A  | 0.991(19)  | C11-H11B  | 0.959(16)  |
| C12-C15B  | 1.482(4)   | C12-C13   | 1.533(2)   |
| C12-C15A  | 1.581(4)   | C12-H12   | 1.06(2)    |
| C13-C14   | 1.519(2)   | C13-H13A  | 1.01(2)    |
| C13-H13B  | 1.015(18)  | C14-H14A  | 0.979(17)  |
| C14-H14B  | 1.014(19)  | C15A-H15A | 0.98       |
| C15A-H15B | 0.98       | C15A-H15C | 0.98       |
| C15B-H15D | 0.98       | C15B-H15E | 0.98       |
| C15B-H15F | 0.98       |           |            |



**Table 5. Bond angles (°) for IS141\_3.**

|                |            |                |            |
|----------------|------------|----------------|------------|
| N2-O1-N1       | 107.30(8)  | O2-N1-C7       | 135.13(11) |
| O2-N1-O1       | 117.17(9)  | C7-N1-O1       | 107.69(9)  |
| C8-N2-O1       | 107.11(10) | C9-N3-C14      | 109.79(10) |
| C9-N3-C10      | 110.19(9)  | C14-N3-C10     | 110.63(10) |
| F1-C1-C2       | 118.80(11) | F1-C1-C6       | 117.71(12) |
| C2-C1-C6       | 123.49(11) | C1-C2-C3       | 118.21(11) |
| C1-C2-H2       | 121.9(11)  | C3-C2-H2       | 119.8(11)  |
| C2-C3-C4       | 119.91(12) | C2-C3-H3       | 120.4(9)   |
| C4-C3-H3       | 119.6(9)   | C5-C4-C3       | 120.03(10) |
| C5-C4-C7       | 118.20(10) | C3-C4-C7       | 121.77(11) |
| C6-C5-C4       | 120.19(11) | C6-C5-H5       | 120.3(10)  |
| C4-C5-H5       | 119.5(10)  | C1-C6-C5       | 118.16(12) |
| C1-C6-H6       | 119.3(11)  | C5-C6-H6       | 122.5(11)  |
| N1-C7-C8       | 106.37(10) | N1-C7-C4       | 123.31(10) |
| C8-C7-C4       | 130.32(10) | N2-C8-C7       | 111.50(11) |
| N2-C8-C9       | 121.92(11) | C7-C8-C9       | 126.50(10) |
| N3-C9-C8       | 112.01(10) | N3-C9-H9A      | 111.3(10)  |
| C8-C9-H9A      | 107.9(10)  | N3-C9-H9B      | 108.0(9)   |
| C8-C9-H9B      | 107.7(9)   | H9A-C9-H9B     | 109.9(13)  |
| N3-C10-C11     | 110.66(11) | N3-C10-H10A    | 110.2(10)  |
| C11-C10-H10A   | 110.2(10)  | N3-C10-H10B    | 108.5(10)  |
| C11-C10-H10B   | 111.7(10)  | H10A-C10-H10B  | 105.4(14)  |
| C10-C11-C12    | 111.21(12) | C10-C11-H11A   | 109.0(11)  |
| C12-C11-H11A   | 110.4(11)  | C10-C11-H11B   | 111.2(9)   |
| C12-C11-H11B   | 108.5(9)   | H11A-C11-H11B  | 106.5(15)  |
| C15B-C12-C11   | 114.53(19) | C15B-C12-C13   | 115.7(2)   |
| C11-C12-C13    | 108.91(12) | C11-C12-C15A   | 109.90(19) |
| C13-C12-C15A   | 106.69(19) | C15B-C12-H12   | 98.2(11)   |
| C11-C12-H12    | 110.5(11)  | C13-C12-H12    | 108.4(11)  |
| C15A-C12-H12   | 112.3(11)  | C14-C13-C12    | 110.79(12) |
| C14-C13-H13A   | 109.4(12)  | C12-C13-H13A   | 111.1(12)  |
| C14-C13-H13B   | 108.9(10)  | C12-C13-H13B   | 108.5(10)  |
| H13A-C13-H13B  | 108.0(15)  | N3-C14-C13     | 110.59(12) |
| N3-C14-H14A    | 109.0(10)  | C13-C14-H14A   | 109.6(10)  |
| N3-C14-H14B    | 111.3(10)  | C13-C14-H14B   | 109.8(10)  |
| H14A-C14-H14B  | 106.5(15)  | C12-C15A-H15A  | 109.5      |
| C12-C15A-H15B  | 109.5      | H15A-C15A-H15B | 109.5      |
| C12-C15A-H15C  | 109.5      | H15A-C15A-H15C | 109.5      |
| H15B-C15A-H15C | 109.5      | C12-C15B-H15D  | 109.5      |
| C12-C15B-H15E  | 109.5      | H15D-C15B-H15E | 109.5      |
| C12-C15B-H15F  | 109.5      | H15D-C15B-H15F | 109.5      |
| H15E-C15B-H15F | 109.5      |                |            |

**Table 6. Anisotropic atomic displacement parameters ( $\text{\AA}^2$ ) for IS141\_3.**

The anisotropic atomic displacement factor exponent takes the form:  $-2\pi^2 [ h^2 a^{*2} U_{11} + \dots + 2 h k a^* b^* U_{12} ]$

|     | $U_{11}$  | $U_{22}$  | $U_{33}$  | $U_{23}$   | $U_{13}$   | $U_{12}$   |
|-----|-----------|-----------|-----------|------------|------------|------------|
| F1  | 0.0453(5) | 0.0384(5) | 0.0132(3) | 0.0006(3)  | -0.0022(3) | 0.0002(4)  |
| O1  | 0.0209(4) | 0.0274(4) | 0.0196(4) | 0.0009(3)  | -0.0038(3) | -0.0004(3) |
| O2  | 0.0188(4) | 0.0335(5) | 0.0312(5) | -0.0035(4) | 0.0030(4)  | 0.0045(4)  |
| N1  | 0.0189(5) | 0.0206(5) | 0.0197(5) | -0.0002(4) | -0.0006(4) | -0.0007(4) |
| N2  | 0.0225(5) | 0.0246(5) | 0.0185(5) | 0.0007(4)  | -0.0008(4) | -0.0027(4) |
| N3  | 0.0164(4) | 0.0236(5) | 0.0157(4) | 0.0041(4)  | 0.0009(3)  | -0.0020(4) |
| C1  | 0.0314(6) | 0.0220(5) | 0.0131(5) | -0.0004(4) | 0.0000(4)  | 0.0047(5)  |
| C2  | 0.0323(6) | 0.0204(5) | 0.0185(5) | 0.0007(4)  | 0.0086(5)  | 0.0014(5)  |
| C3  | 0.0235(6) | 0.0179(5) | 0.0202(5) | -0.0012(4) | 0.0061(4)  | -0.0001(4) |
| C4  | 0.0189(5) | 0.0163(5) | 0.0143(5) | -0.0001(4) | 0.0021(4)  | 0.0025(4)  |
| C5  | 0.0187(5) | 0.0186(5) | 0.0155(5) | 0.0005(4)  | 0.0014(4)  | 0.0021(4)  |
| C6  | 0.0216(5) | 0.0211(5) | 0.0175(5) | -0.0010(4) | -0.0008(4) | 0.0031(4)  |
| C7  | 0.0167(5) | 0.0169(5) | 0.0156(5) | 0.0008(4)  | 0.0001(4)  | -0.0009(4) |
| C8  | 0.0205(5) | 0.0182(5) | 0.0147(5) | 0.0005(4)  | 0.0010(4)  | -0.0042(4) |
| C9  | 0.0210(5) | 0.0206(5) | 0.0172(5) | 0.0001(4)  | 0.0032(4)  | -0.0010(4) |
| C10 | 0.0223(6) | 0.0315(6) | 0.0178(5) | 0.0072(5)  | 0.0005(4)  | -0.0039(5) |
| C11 | 0.0259(6) | 0.0326(7) | 0.0308(7) | 0.0110(6)  | 0.0012(5)  | -0.0068(5) |
| C12 | 0.0231(6) | 0.0394(8) | 0.0381(8) | 0.0093(6)  | 0.0043(6)  | -0.0077(6) |
| C13 | 0.0203(6) | 0.0418(8) | 0.0350(7) | 0.0078(6)  | -0.0037(5) | -0.0055(6) |
| C14 | 0.0197(6) | 0.0319(7) | 0.0247(6) | 0.0078(5)  | 0.0004(4)  | 0.0014(5)  |

**Table 7. Hydrogen atomic coordinates and isotropic atomic displacement parameters ( $\text{\AA}^2$ ) for IS141\_3.**

|      | <b>x/a</b>  | <b>y/b</b> | <b>z/c</b> | <b>U(eq)</b> |
|------|-------------|------------|------------|--------------|
| H2   | 0.5259(16)  | 0.678(3)   | 0.5563(10) | 0.039(5)     |
| H3   | 0.6140(14)  | 0.702(2)   | 0.6781(8)  | 0.023(4)     |
| H5   | 0.3103(15)  | 0.476(2)   | 0.7425(9)  | 0.024(4)     |
| H6   | 0.2270(16)  | 0.451(2)   | 0.6191(9)  | 0.028(4)     |
| H9A  | 0.3416(14)  | 0.797(2)   | 0.8982(9)  | 0.025(4)     |
| H9B  | 0.3207(13)  | 0.795(2)   | 0.8137(8)  | 0.019(4)     |
| H10A | 0.2391(15)  | 0.594(2)   | 0.9652(9)  | 0.027(4)     |
| H10B | 0.3434(15)  | 0.454(2)   | 0.9483(9)  | 0.028(4)     |
| H12  | 0.0148(17)  | 0.492(3)   | 0.9360(11) | 0.041(5)     |
| H11A | 0.1759(16)  | 0.285(3)   | 0.9800(10) | 0.041(5)     |
| H11B | 0.1947(14)  | 0.232(2)   | 0.9018(8)  | 0.020(4)     |
| H13A | -0.0351(18) | 0.529(3)   | 0.8082(11) | 0.040(5)     |
| H13B | 0.0690(15)  | 0.382(2)   | 0.7935(9)  | 0.028(4)     |
| H14A | 0.1371(15)  | 0.689(2)   | 0.7828(9)  | 0.030(4)     |
| H14B | 0.1114(16)  | 0.741(3)   | 0.8616(10) | 0.034(5)     |
| H15A | -0.1179     | 0.2559     | 0.8704     | 0.052        |
| H15B | -0.0411     | 0.1571     | 0.9372     | 0.052        |
| H15C | -0.0062     | 0.1300     | 0.8582     | 0.052        |
| H15D | -0.1245     | 0.2999     | 0.8896     | 0.052        |
| H15E | -0.0434     | 0.2095     | 0.9567     | 0.052        |
| H15F | -0.0302     | 0.1424     | 0.8771     | 0.052        |
